# Supplementary material
Source: publisher figshare collection journal article supplement (https://acs.figshare.com/ndownloader/files/6498723)

# Supporting Information

## For

### Nickel-Catalyzed Monofluoroalkylation of Arylsilanes *via* Hiyama Cross-Coupling

Yun Wu, Hao-Ran Zhang, Yi-Xuan Cao, Quan Lan, and Xi-Sheng Wang\*

## Table of Contents

|                                                                                                                  |     |
|------------------------------------------------------------------------------------------------------------------|-----|
| General information .....                                                                                        | S2  |
| Optimization of reaction conditions .....                                                                        | S3  |
| Table S1. Ligand screening .....                                                                                 | S3  |
| Table S2. Ni-source screening .....                                                                              | S3  |
| Table S3. Base and solvent screening .....                                                                       | S4  |
| Table S4. Optimization of reaction conditions .....                                                              | S4  |
| Preparation of arylsilanes 1.....                                                                                | S5  |
| Synthesis route toward 1w.....                                                                                   | S5  |
| Synthesis route toward 1aa .....                                                                                 | S5  |
| Synthesis route towards ezetimibe derivative 5.....                                                              | S6  |
| General Procedure for Nickel-Catalyzed Monofluoroalkylation of Arylsilanes <i>via</i> Hiyama Cross-Coupling..... | S8  |
| Procedure of Monofluoroalkylation of Ezetimibe Derivative 5 .....                                                | S16 |
| Mechanistic studies .....                                                                                        | S17 |
| 1. Radical Trapping Experiment with TEMPO.....                                                                   | S17 |
| 2. Procedure of Monofluoroalkylation of $\beta$ -pinene.....                                                     | S18 |
| References .....                                                                                                 | S19 |
| NMR spectra of new compounds ( $^1\text{H}$ NMR, $^{13}\text{C}$ NMR, $^{19}\text{F}$ NMR) .....                 | S21 |

## General information

NMR spectra were recorded on Bruker-400 MHz NMR spectrometer (400 MHz for  $^1\text{H}$ ; 101 MHz for  $^{13}\text{C}$  and 376 MHz for  $^{19}\text{F}$ ).  $^1\text{H}$  NMR chemical shifts were determined relative to internal  $(\text{CH}_3)_4\text{Si}$  (TMS) at  $\delta$  0.0 or to the signal of a residual protonated solvent:  $\text{CDCl}_3$   $\delta$  7.26.  $^{13}\text{C}$  NMR chemical shifts were determined relative to  $\text{CDCl}_3$   $\delta$  77.16.  $^{19}\text{F}$  NMR chemical shifts were determined relative to external  $\text{CFC}_3$  at  $\delta$  0.0 or internal  $\text{PhCF}_3$  at  $\delta$  63.0. High resolution mass spectra were recorded on P-SIMS-Gly of Bruker Daltonics Inc. using ESI-TOF (electrospray ionization-time of flight). 1,4-Dioxane was distilled from sodium immediately before use.  $\text{Ni}(\text{dme})\text{Cl}_2$  was obtained from Strem Chemicals. Inc (*J&K* purchased). 4,4'-Di*t*Bu-bpy was obtained from Macklin and used as received. CsF was obtained from *J&K*.  $\text{BrCHFCO}_2\text{Et}$  was obtained from Fluorochem Ltd (UK) (*J&K* purchased) and used as received. dppp = 1,3-bis(diphenylphosphino)propane, TMEDA = *N,N,N',N'*-tetramethylethylenediamine, DMF = *N,N*-dimethylformamide, DCM = dichloromethane, THF = tetrahydrofuran.

## Optimization of reaction conditions

**Table S1.** Ligand screening<sup>a</sup>

Reaction scheme: **1a** (phenyltriethoxysilane) + **2** (BrCFHCO<sub>2</sub>Et) reacts with Ni(dme)Cl<sub>2</sub> (10 mol %), Ligand (12 mol %), CsF (2 equiv) in 1,4-dioxane (2 mL) at 80 °C to form **3a** (ethyl 1-phenyl-2-fluoroacetate).

Ligands shown: **L1** (1,10-phenanthroline), **L2** (2,2'-bipyridine, Q = H), **L3** (2,2'-bipyridine, Q = OMe), **L4** (2,2'-bipyridine, Q = *t*Bu), **L5** (1,3-bis(dimethylamino)cyclohexane), **L6** (1,2-bis(2-pyridyl)ethane), **L7** (1,2-bis(benzyl)-4,5-dihydro-1,3-dioxazole).

| Entry | ligand           | Yield (%) <sup>b</sup> |
|-------|------------------|------------------------|
| 1     | -                | 0                      |
| 2     | <b>L1</b>        | 22                     |
| 3     | <b>L2</b>        | 26                     |
| 4     | <b>L3</b>        | 37                     |
| 5     | <b>L4</b>        | <b>45</b>              |
| 6     | <b>L5</b>        | 22                     |
| 7     | TMEDA            | 30                     |
| 8     | <b>L6</b>        | 0                      |
| 9     | <b>L7</b>        | 0                      |
| 10    | PPh <sub>3</sub> | 0                      |
| 11    | dppp             | 0                      |

<sup>a</sup>The reaction conditions were as follows: **1a** (0.3 mmol, 1.5 equiv), **2** (0.2 mmol, 1.0 equiv), Ni(dme)Cl<sub>2</sub> (0.02 mmol, 10 mol %), ligand (0.024 mmol, 12 mol %), CsF (0.4 mmol, 2.0 equiv), 1,4-dioxane (2.0 mL), 80 °C, 24 h, N<sub>2</sub>. <sup>b</sup>Yields determined by <sup>19</sup>F NMR using CF<sub>3</sub>Ph as an internal standard.

**Table S2.** Ni-source screening<sup>a</sup>

Reaction scheme: **1a** (phenyltriethoxysilane) + **2** (BrCFHCO<sub>2</sub>Et) reacts with [Ni] (10 mol %), **L4** (12 mol %), CsF (2 equiv) in 1,4-dioxane (2 mL) at 80 °C to form **3a** (ethyl 1-phenyl-2-fluoroacetate).

| Entry | [Ni]                                               | Yield (%) <sup>b</sup> | Entry     | [Ni]                                                 | Yield (%) <sup>b</sup> |
|-------|----------------------------------------------------|------------------------|-----------|------------------------------------------------------|------------------------|
| 1     | -                                                  | 0                      | 8         | NiCl <sub>2</sub> (dppe)                             | 41                     |
| 2     | NiBr <sub>2</sub>                                  | 41                     | 9         | NiCl <sub>2</sub> (dppf)                             | 41                     |
| 3     | NiI <sub>2</sub>                                   | 37                     | 10        | Ni(OTf) <sub>2</sub>                                 | <5                     |
| 4     | NiCl <sub>2</sub>                                  | 41                     | 11        | Ni(NO <sub>3</sub> ) <sub>2</sub> •6H <sub>2</sub> O | 30                     |
| 5     | Ni(acac) <sub>2</sub>                              | 11                     | <b>12</b> | <b>NiCl<sub>2</sub>(dme)</b>                         | <b>45</b>              |
| 6     | NiCl <sub>2</sub> (PPh <sub>3</sub> ) <sub>2</sub> | 37                     | 13        | Ni(OAc) <sub>2</sub>                                 | 41                     |
| 7     | NiCl <sub>2</sub> (dppp)                           | 41                     |           |                                                      |                        |

<sup>a</sup>The reaction conditions were as follows: **1a** (0.3 mmol, 1.5 equiv), **2** (0.2 mmol, 1.0 equiv), [Ni] (0.02 mmol, 10 mol %), **L4** (0.024 mmol, 12 mol %), CsF (0.4 mmol, 2.0 equiv), 1,4-dioxane (2.0 mL), 80 °C, 24 h, N<sub>2</sub>. <sup>b</sup>Yields determined by <sup>19</sup>F NMR using CF<sub>3</sub>Ph as an internal standard.

**Table S3.** Base and solvent screening<sup>a</sup>

| entry | base                            | solvent | yield (%) <sup>b</sup> | entry | base | solvent            | yield (%) <sup>b</sup> |
|-------|---------------------------------|---------|------------------------|-------|------|--------------------|------------------------|
| 1     | -                               | dioxane | 0                      | 9     | CsF  | dioxane            | 45                     |
| 2     | KOAc                            | dioxane | 0                      | 10    | TBAF | dioxane            | 0                      |
| 3     | <i>t</i> BuOK                   | dioxane | 0                      | 11    | CsF  | THF                | 41                     |
| 4     | KF                              | dioxane | 0                      | 12    | CsF  | DMF                | 30                     |
| 5     | K <sub>3</sub> PO <sub>4</sub>  | dioxane | 0                      | 13    | CsF  | DCM                | 37                     |
| 6     | Cs <sub>2</sub> CO <sub>3</sub> | dioxane | 0                      | 14    | CsF  | CH <sub>3</sub> CN | 22                     |
| 7     | K <sub>2</sub> CO <sub>3</sub>  | dioxane | 0                      | 15    | CsF  | toluene            | 18                     |
| 8     | NaOH                            | dioxane | 0                      |       |      |                    |                        |

<sup>a</sup>The reaction conditions were as follows: **1a** (0.3 mmol, 1.5 equiv), **2** (0.2 mmol, 1.0 equiv), Ni(dme)Cl<sub>2</sub> (0.02 mmol, 10 mol %), **L4** (0.024 mmol, 12 mol %), base (2 equiv), solvent (2 mL), 80 °C, 24 h, N<sub>2</sub>. <sup>b</sup>Yields determined by <sup>19</sup>F NMR using CF<sub>3</sub>Ph as an internal standard.

**Table S4.** Optimization of reaction conditions<sup>a</sup>

| Entry | x   | y   | Yield (%) <sup>b</sup> | Entry           | x   | y   | Yield (%) <sup>b</sup> |
|-------|-----|-----|------------------------|-----------------|-----|-----|------------------------|
| 1     | 2.0 | 2.0 | 45                     | 6               | 5.0 | 1.0 | 86                     |
| 2     | 3.0 | 2.0 | 64                     | 7               | 5.0 | 1.5 | 93                     |
| 3     | 4.0 | 2.0 | 87                     | 8               | 5.0 | 2.5 | 96(93) <sup>c</sup>    |
| 4     | 5.0 | 2.0 | 90                     | 9               | 5.0 | 3.0 | 96                     |
| 5     | 6.0 | 2.0 | 90                     | 10 <sup>d</sup> | 5.0 | 2.5 | 96(93) <sup>c</sup>    |

<sup>a</sup>Unless otherwise noted, the reaction conditions were as follows: **1a** (0.3 mmol, 1.5 equiv), **2** (0.2 mmol, 1.0 equiv), Ni(dme)Cl<sub>2</sub> (0.02 mmol, 10 mol %), **L4** (0.024 mmol, 12 mol %), CsF (x equiv), 1,4-dioxane (y mL), 80 °C, 24 h, N<sub>2</sub>. <sup>b</sup>Yields determined by <sup>19</sup>F NMR using CF<sub>3</sub>Ph as an internal standard. <sup>c</sup>Isolated yield. <sup>d</sup>**1a** (1.2 equiv).

## Preparation of arylsilanes 1.

The arylsilane **1a** was purchased and used directly from commercial sources, and substrates **1b-1m**<sup>1</sup>, **1o-1r**<sup>1</sup>, **1y-1z**<sup>1</sup>, **1n**<sup>2</sup>, **1s**<sup>3</sup>, **1t**<sup>4</sup>, **1u-1v**<sup>5</sup>, **1x**<sup>6</sup>, **1ab**<sup>6</sup> and **1ac**<sup>7</sup> were prepared in accordance with methods described in the literature.

### Synthesis route toward **1w**

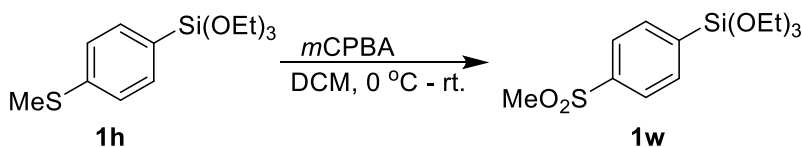

To a solution of **1h** (265 mg, 0.92 mmol) in DCM (5 mL) was added *m*CPBA (498 mg, 2.3 mmol) at 0 °C. The reaction mixture was stirred for 2 h at room temperature. The solution was added saturated sodium hyposulfite (10 mL), and extracted with DCM (3 x 10 mL). The combined organic layers were washed with saturated sodium chloride (40 mL), dried over Na<sub>2</sub>SO<sub>4</sub>, filtered and concentrated in vacuo. The residue was then purified by flash column chromatography (PE/EA = 5:1) to give **1w** as a colorless oil (234 mg, 80%).

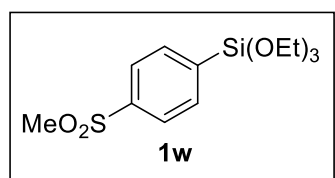

<sup>1</sup>H NMR (400 MHz, CDCl<sub>3</sub>) δ 7.92 (d, *J* = 8.3 Hz, 2H), 7.86 (d, *J* = 8.3 Hz, 2H), 3.87 (q, *J* = 7.0 Hz, 6H), 3.03 (s, 6H), 1.24 (t, *J* = 7.0 Hz, 9H). <sup>13</sup>C NMR (101 MHz, CDCl<sub>3</sub>) δ 142.1, 138.8, 135.7, 126.3, 59.1, 44.4, 18.2. HRMS (ESI)

calcd. for C<sub>13</sub>H<sub>22</sub>O<sub>5</sub>SSiNa [M+Na]<sup>+</sup> 341.0855, found: 341.0851.

### Synthesis route toward **1aa**

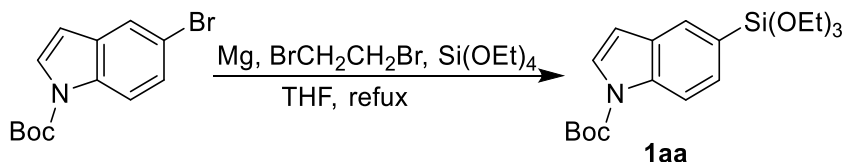

A 250 mL three-neck flask was fitted with an addition funnel, a reflux condenser, a rubber septum, and a stir bar. The flask was charged with magnesium turnings (0.68 g, 28.3 mmol), flame-dried under vacuum, and back-filled with argon. Freshly dried THF (20 mL) and tetraethyl silicate (8.3 mL, 37.8 mmol) were added into the flask via syringe, and the addition funnel was charged with *N*-Boc-5-bromoindole (2.80 g, 9.45

mmol) and 1, 2-dibromoethane (0.90 g, 4.73 mmol) dissolved in THF (15 mL). Then, the aryl bromide was added at such a rate that THF maintained a moderate reflux. After the reaction mixture was stirred at reflux overnight, it was cooled to room temperature. The saturated  $\text{NH}_4\text{Cl}$  solution was added carefully, and the solution was extracted with EtOAc (3 x 30 mL) for three times. The organic phase was dried over  $\text{Na}_2\text{SO}_4$ , filtered, and concentrated in vacuo. The crude product was purified by silica gel column chromatograph (PE/EtOAc = 40/1) to give **1aa** as a colorless oil (1.62 g, 45%).

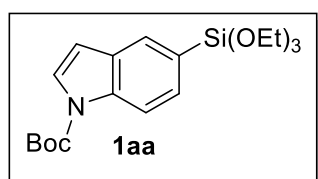

$^1\text{H}$  NMR (400 MHz,  $\text{CDCl}_3$ )  $\delta$  8.16 (d,  $J$  = 8.3 Hz, 1H), 7.92 (s, 1H), 7.62-7.60 (m, 2H), 6.59 (d,  $J$  = 3.7 Hz, 1H), 3.88 (q,  $J$  = 7.0 Hz, 6H), 1.67 (s, 9H), 1.25 (t,  $J$  = 7.0 Hz, 9H).  $^{13}\text{C}$  NMR (101 MHz,  $\text{CDCl}_3$ )  $\delta$  149.8, 136.7, 130.4, 128.4, 126.0, 124.2, 114.9, 107.5, 83.9, 77.4, 77.1, 76.8, 58.8, 28.2, 18.3. HRMS (ESI) calcd. for  $\text{C}_{19}\text{H}_{29}\text{NO}_5\text{SiNa}$   $[\text{M}+\text{Na}]^+$  402.1713, found: 402.1716.

### Synthesis route towards ezetimibe derivative **5**

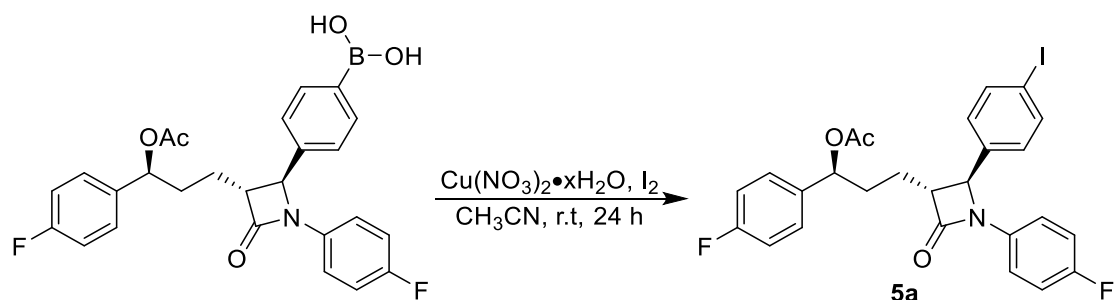

To a 50 mL of round-bottom flask were added  $\text{Cu}(\text{NO}_3)_2 \cdot x\text{H}_2\text{O}$  (167 mg, 0.69 mmol), , iodine (588 mg, 2.31 mmol), acetylated ezetimibe boronic acid<sup>8</sup> (1.11 g, 2.31 mmol) and dry acetonitrile (15 mL). The reaction mixture was stirred for 24 h at room temperature under an argon atmosphere. After the addition of water (60 mL), the reaction was extracted with DCM (3 x 40 mL). The combined organic layers were washed with saturated sodium hyposulfite (40 mL), dried over  $\text{Na}_2\text{SO}_4$ , filtered and concentrated in vacuo. The residue was then purified by flash column chromatography (PE/EA = 3:1) to give **5a** as a colorless solid (900 mg, 69%).

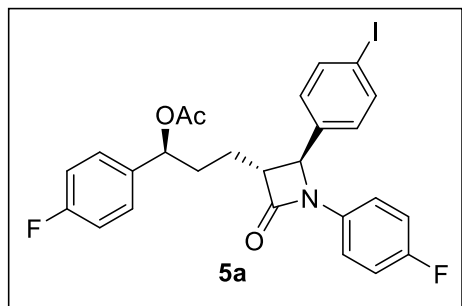

$^1\text{H}$  NMR (400 MHz,  $\text{CDCl}_3$ )  $\delta$  7.71 (d,  $J = 8.4$  Hz, 2H), 7.28-7.25 (m, 2H), 7.21-7.16 (m, 2H), 7.07-7.05 (d,  $J = 8.3$  Hz, 2H), 7.02 (t,  $J = 8.7$  Hz, 2H), 6.93 (t,  $J = 8.7$  Hz, 2H), 5.69 (t,  $J = 6.7$  Hz, 1H), 4.54 (d,  $J = 2.3$  Hz, 1H), 3.04 (td,  $J = 7.7$ , 2.3 Hz, 1H), 2.05-1.99 (m, 5H), 1.93-1.81 (m,

2H).  $^{13}\text{C}$  NMR (101 MHz,  $\text{CDCl}_3$ )  $\delta$  170.3, 166.6, 162.6 (d,  $J = 247$  Hz), 159.2 (d,  $J = 244$  Hz), 138.6, 137.3, 135.7 (d,  $J = 3.2$  Hz), 133.7 (d,  $J = 2.7$  Hz), 128.3 (d,  $J = 8.2$  Hz), 127.8, 118.4 (d,  $J = 7.9$  Hz), 116.0 (d,  $J = 22.7$  Hz), 115.6 (d,  $J = 21.5$  Hz), 94.3, 74.9, 60.8, 60.2, 33.7, 25.0, 21.3.  $^{19}\text{F}$  NMR (376 MHz,  $\text{CDCl}_3$ )  $\delta$  -113.6, -117.5. HRMS (ESI) calcd. for  $\text{C}_{26}\text{H}_{22}\text{F}_2\text{INO}_3\text{Na}$   $[\text{M}+\text{Na}]^+$  584.0510, found: 584.0509.

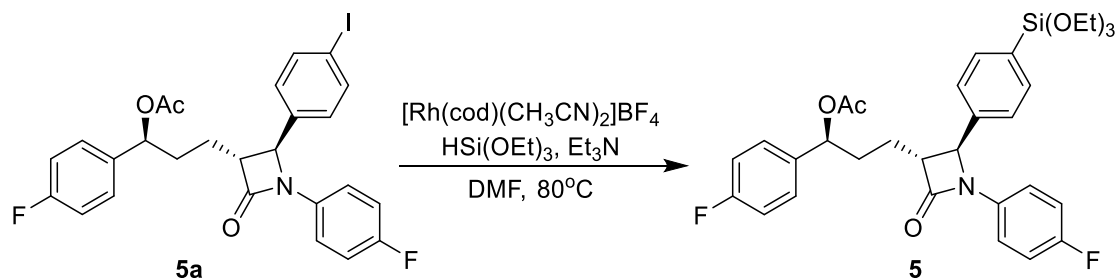

To a solution of  $[\text{Rh}(\text{cod})(\text{MeCN})_2]\text{BF}_4$  (10 mg, 0.03 mmol) in dry DMF (3 mL) was added ezetimibe derivative **5a** (500 mg, 0.89 mmol),  $\text{Et}_3\text{N}$  (0.37 mL, 2.67 mmol), and triethoxysilane (0.32 mL, 1.78 mmol). After being stirred for 2.5 h at 80 °C, then the solution was cooled to r.t. The mixture was diluted with EtOAc (100 mL) and washed three times with water, dried over  $\text{Na}_2\text{SO}_4$ , filtrated and concentrated under vacuum. The residue was purified by flash column chromatography (PE/EA = 3:1) to give **5** as a colorless oil (455 mg, 75%).

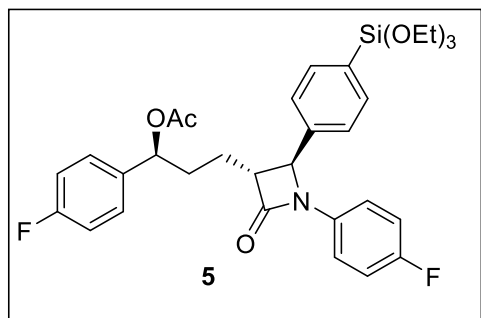

$^1\text{H}$  NMR (400 MHz,  $\text{CDCl}_3$ )  $\delta$  7.68 (d,  $J = 8.0$  Hz, 2H), 7.32 (d,  $J = 8.0$  Hz, 2H), 7.28-7.25 (m, 2H), 7.23-7.19 (m, 2H), 7.02 (t,  $J = 8.7$  Hz, 2H), 6.92 (t,  $J = 8.7$  Hz, 2H), 5.70 (t,  $J = 6.7$  Hz, 1H), 4.59 (d,  $J = 2.2$  Hz, 1H), 3.88 (q,  $J = 7.0$  Hz, 6H), 3.07 (td,  $J = 7.7$ , 2.2 Hz, 1H), 2.09-2.00 (m, 5H), 1.92-1.83 (m, 2H), 1.25 (t,  $J = 7.0$  Hz, 9H).  $^{13}\text{C}$  NMR (101 MHz,

CDCl<sub>3</sub>)  $\delta$  170.3, 166.9, 162.5 (d,  $J$  = 246.7 Hz), 159.1 (d,  $J$  = 243.5 Hz), 139.6, 135.8, 135.8, 133.9 (d,  $J$  = 2.7 Hz), 132.1, 128.3 (d,  $J$  = 8.3 Hz), 125.3, 118.4 (d,  $J$  = 7.9 Hz), 116.0 (d,  $J$  = 22.7 Hz), 115.6 (d,  $J$  = 21.7 Hz), 74.9, 61.3, 60.1, 58.9, 33.7, 25.0, 21.3, 18.3. <sup>19</sup>F NMR (376 MHz, CDCl<sub>3</sub>)  $\delta$  -113.7, -117.9. HRMS (ESI) calcd. for C<sub>32</sub>H<sub>37</sub>F<sub>2</sub>NO<sub>6</sub>SiNa [M+Na]<sup>+</sup> 620.2256, found: 620.2258.

## General Procedure for Nickel-Catalyzed Monofluoroalkylation of Arylsilanes *via* Hiyama Cross-Coupling

To a 25 mL of Schlenk tube were added Ni(dme)Cl<sub>2</sub> (10 mol %, 0.02 mmol, 4.4 mg), **L4** (12 mol %, 0.024 mmol, 6.5 mg) and CsF (5.0 equiv, 1 mmol, 152 mg) under air. The vessel was evacuated and backfilled with N<sub>2</sub> (3 times) and 1,4-dioxane (2.5 mL) was added via syringe. The mixture was stirred for 15 min, and then the arylsilane (1.2 or 2.0 equiv, 0.24 or 0.4 mmol) was added. After stirring for an additional 10 min, the BrCFHCO<sub>2</sub>Et (1.0 equiv, 0.2 mmol, 24  $\mu$ L) was added, and the reaction mixture was heated in a preheated oil bath at 80 or 100 °C for 24 h. The reaction mixture was cooled to room temperature, diluted with EtOAc and filtered through a pad of celite. The filtrate was concentrated under vacuum and purified by flash column chromatography to give desired fluoroalkylated product **3**.

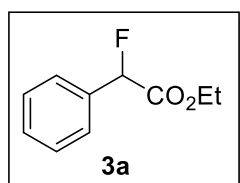

The product **3a**<sup>8</sup> was purified with silica gel chromatography (PE/EA = 30:1) as a colorless oil (33.9 mg, 93% yield). <sup>1</sup>H NMR (400 MHz, CDCl<sub>3</sub>)  $\delta$  7.48-7.46 (m, 2H), 7.42-7.40 (m, 3H), 5.77 (d,  $J$  = 47.8 Hz, 1H), 4.32-4.17 (m, 2H), 1.26 (t,  $J$  = 7.1 Hz, 3H). <sup>13</sup>C NMR (101 MHz, CDCl<sub>3</sub>)  $\delta$  168.6 (d,  $J$  = 27.6 Hz), 134.4 (d,  $J$  = 20.4 Hz), 129.7 (d,  $J$  = 2.22 Hz), 128.8, 126.7 (d,  $J$  = 6.16 Hz), 89.5 (d,  $J$  = 186.1 Hz), 61.9, 14.1. <sup>19</sup>F NMR (376 MHz, CDCl<sub>3</sub>)  $\delta$  -179.8.

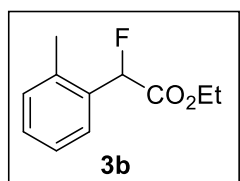

The product **3b**<sup>8</sup> was purified with silica gel chromatography (PE/EA = 30:1) as a colorless oil (31 mg, 79% yield). <sup>1</sup>H NMR (400 MHz, CDCl<sub>3</sub>)  $\delta$  7.40 (d,  $J$  = 7.5 Hz, 1H), 7.32-7.20 (m, 3H), 5.97 (d,  $J$  = 47.3 Hz, 1H), 4.33-4.17 (m, 2H), 2.44 (s, 3H), 1.26 (t,  $J$  = 7.1 Hz, 3H). <sup>13</sup>C NMR (101 MHz, CDCl<sub>3</sub>)  $\delta$  169.0 (d,  $J$  = 27.9 Hz), 136.7 (d,  $J$  =



3.7 Hz), 132.9 (d,  $J = 19.2$  Hz), 131.0, 129.7 (d,  $J = 2.6$  Hz), 127.4 (d,  $J = 6.7$  Hz), 126.4, 87.3 (d,  $J = 183.3$  Hz), 61.9, 19.2, 14.1.  $^{19}\text{F}$  NMR (376 MHz,  $\text{CDCl}_3$ )  $\delta$  -179.3.

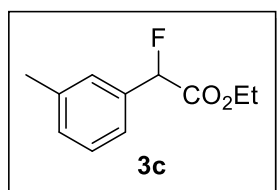

The product **3c**<sup>8</sup> was purified with silica gel chromatography (PE/EA = 30:1) as a colorless oil (32.2 mg, 82% yield).  $^1\text{H}$  NMR (400 MHz,  $\text{CDCl}_3$ )  $\delta$  7.31-7.24 (m, 3H), 7.22-7.20 (m, 1H), 5.73 (d,  $J = 47.9$  Hz, 1H), 4.32-4.16 (m, 2H), 2.37 (s, 3H), 1.26 (t,  $J = 7.1$  Hz, 3H).  $^{13}\text{C}$  NMR (101 MHz,  $\text{CDCl}_3$ )  $\delta$  168.8 (d,  $J = 27.6$  Hz), 138.7, 134.3 (d,  $J = 20.2$  Hz), 130.5 (d,  $J = 2.3$  Hz), 128.7, 127.4 (d,  $J = 5.9$  Hz), 123.9 (d,  $J = 6.0$  Hz), 89.5 (d,  $J = 185.2$  Hz), 61.9, 21.4, 14.1.  $^{19}\text{F}$  NMR (376 MHz,  $\text{CDCl}_3$ )  $\delta$  -179.0

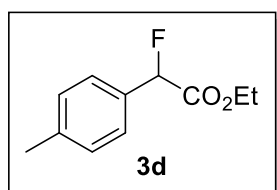

The product **3d**<sup>8</sup> was purified with silica gel chromatography (PE/EA = 30:1) as a colorless oil (35.7 mg, 91% yield).  $^1\text{H}$  NMR (400 MHz,  $\text{CDCl}_3$ )  $\delta$  7.35 (d,  $J = 8.0$  Hz, 2H), 7.21 (d,  $J = 8.0$  Hz, 2H), 5.73 (d,  $J = 47.9$  Hz, 1H), 4.31-4.16 (m, 2H), 2.37 (s, 3H), 1.26 (t,  $J = 7.1$  Hz).  $^{13}\text{C}$  NMR (101 MHz,  $\text{CDCl}_3$ )  $\delta$  168.8 (d,  $J = 27.9$  Hz), 139.8 (d,  $J = 2.5$  Hz), 131.4 (d,  $J = 20.5$  Hz), 129.5, 126.9 (d,  $J = 5.7$  Hz), 89.4 (d,  $J = 184.7$  Hz), 61.8, 21.4, 14.1.  $^{19}\text{F}$  NMR (376 MHz,  $\text{CDCl}_3$ )  $\delta$  -177.6.

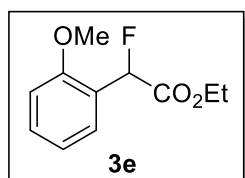

The product **3e**<sup>9</sup> was purified with silica gel chromatography (PE/EA = 30:1) as a colorless oil (31.4 mg, 74% yield).  $^1\text{H}$  NMR (400 MHz,  $\text{CDCl}_3$ )  $\delta$  7.41-7.36 (m, 2H), 6.99 (tt,  $J = 7.5, 0.9$  Hz, 1H), 6.93 (d,  $J = 8.6$  Hz, 1H), 6.09 (d,  $J = 47.5$  Hz, 1H), 4.32-4.20 (m, 2H), 3.86 (s, 3H), 1.26 (t,  $J = 7.1$  Hz, 3H).  $^{13}\text{C}$  NMR (101 MHz,  $\text{CDCl}_3$ )  $\delta$  169.2 (d,  $J = 27.7$  Hz), 157.4 (d,  $J = 3.5$  Hz), 131.4 (d,  $J = 3.1$  Hz), 129.3 (d,  $J = 5.1$  Hz), 123.0 (d,  $J = 19.3$  Hz), 120.8 (d,  $J = 1.7$  Hz), 111.2 (d,  $J = 1.4$  Hz), 85.0 (d,  $J = 182.1$  Hz), 61.6, 55.7, 14.2.  $^{19}\text{F}$  NMR (376 MHz,  $\text{CDCl}_3$ )  $\delta$  -177.9 (d,  $J = 47.4$  Hz).

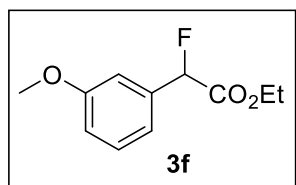

The product **3f**<sup>8</sup> was purified with silica gel chromatography (PE/EA = 30:1) as a colorless oil (39.8 mg, 94% yield).  $^1\text{H}$  NMR (400 MHz,  $\text{CDCl}_3$ )  $\delta$  7.31 (t,  $J = 7.9$  Hz, 1H), 7.04 (d,  $J = 7.7$  Hz, 1H), 7.01 (s, 1H), 6.93 (d,  $J = 8.3$  Hz, 1H), 5.74 (d,  $J = 47.8$  Hz, 1H), 4.31-4.17 (m, 2H), 3.81 (s, 3H), 1.26 (t,  $J = 7.1$  Hz, 3H).  $^{13}\text{C}$  NMR (101 MHz,  $\text{CDCl}_3$ )  $\delta$  168.5 (d,  $J = 27.5$  Hz), 159.9, 135.7 (d,  $J = 20.4$  Hz), 129.9, 118.9

(d,  $J = 6.2$  Hz), 115.4 (d,  $J = 2.0$  Hz), 111.8 (d,  $J = 6.5$  Hz), 89.3 (d,  $J = 185.8$  Hz), 61.9, 55.3, 14.1.  $^{19}\text{F}$  NMR (376 MHz,  $\text{CDCl}_3$ )  $\delta$  -180.2.

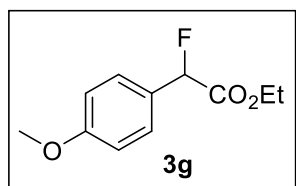

The product **3g**<sup>8</sup> was purified with silica gel chromatography (PE/EA = 20:1) as a colorless oil (38.6 mg, 91% yield).  $^1\text{H}$  NMR (400 MHz,  $\text{CDCl}_3$ )  $\delta$  7.39 (dd,  $J = 8.5, 1.5$  Hz, 1H), 6.92 (d,  $J = 8.3$  Hz, 2H), 5.71 (d,  $J = 47.9$  Hz, 1H), 4.32-4.17 (m, 2H), 3.82 (s, 3H), 1.26 (t,  $J = 7.1$  Hz, 3H).  $^{13}\text{C}$  NMR (101 MHz,  $\text{CDCl}_3$ )  $\delta$  168.9 (d,  $J = 28.5$  Hz), 160.7 (d,  $J = 2.3$  Hz), 128.6 (d,  $J = 5.3$  Hz), 126.5 (d,  $J = 21.1$  Hz), 114.3, 89.2 (d,  $J = 184.4$  Hz), 61.8, 55.4, 14.1.  $^{19}\text{F}$  NMR (376 MHz,  $\text{CDCl}_3$ )  $\delta$  -174.5.

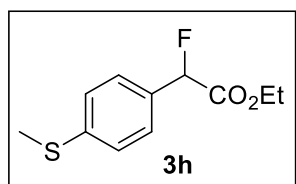

The product **3h**<sup>8</sup> was purified with silica gel chromatography (PE/EA = 30:1) as a colorless oil (42.9 mg, 94% yield).  $^1\text{H}$  NMR (400 MHz,  $\text{CDCl}_3$ )  $\delta$  7.37 (dd,  $J = 8.3, 1.3$  Hz, 2H), 7.26 (d,  $J = 7.9$  Hz, 2H), 5.72 (d,  $J = 47.7$  Hz, 1H), 4.31-4.16 (m, 2H), 2.49 (s, 3H), 1.26 (t,  $J = 7.1$  Hz, 3H).  $^{13}\text{C}$  NMR (101 MHz,  $\text{CDCl}_3$ )  $\delta$  168.6 (d,  $J = 27.9$  Hz), 140.9 (d,  $J = 2.6$  Hz), 130.8 (d,  $J = 20.8$  Hz), 127.3 (d,  $J = 5.8$  Hz), 126.3, 89.1 (d,  $J = 185.3$  Hz), 61.9, 15.4, 14.1.  $^{19}\text{F}$  NMR (376 MHz,  $\text{CDCl}_3$ )  $\delta$  -178.3.

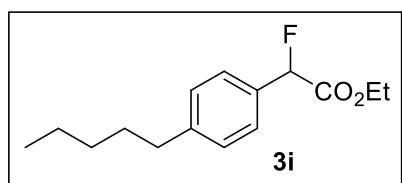

The product **3i** was purified with silica gel chromatography (PE/EA = 30:1) as a colorless oil (46.9 mg, 93% yield).  $^1\text{H}$  NMR (400 MHz,  $\text{CDCl}_3$ )  $\delta$  7.36 (dd,  $J = 8.0, 1.3$  Hz, 2H), 7.21 (d,  $J = 7.9$  Hz, 2H), 5.74 (d,  $J = 47.9$  Hz, 1H), 4.32-4.17 (m, 2H), 2.61 (t,  $J = 7.6$  Hz, 2H), 1.65-1.57 (m, 2H), 1.36-1.29 (m, 4H), 1.26 (t,  $J = 7.1$  Hz, 3H), 0.89 (t,  $J = 7.0$  Hz, 3H).  $^{13}\text{C}$  NMR (101 MHz,  $\text{CDCl}_3$ )  $\delta$  168.9 (d,  $J = 27.8$  Hz), 144.8 (d,  $J = 2.5$  Hz), 131.6 (d,  $J = 20.6$  Hz), 128.9, 126.9 (d,  $J = 5.7$  Hz), 89.5 (d,  $J = 184.8$  Hz), 61.8, 35.8, 31.6, 31.1, 22.6, 14.2, 14.1.  $^{19}\text{F}$  NMR (376 MHz,  $\text{CDCl}_3$ )  $\delta$  -177.6. HRMS (ESI) calcd. for  $\text{C}_{15}\text{H}_{21}\text{FO}_2\text{Na}$   $[\text{M}+\text{Na}]^+$  275.1423, found: 275.1420.

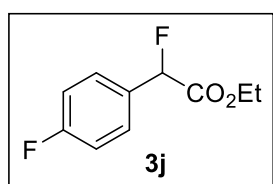

The product **3j**<sup>8</sup> was purified with silica gel chromatography (PE/EA = 30:1) as a colorless oil (36.4 mg, 91% yield).  $^1\text{H}$  NMR (400 MHz,  $\text{CDCl}_3$ )  $\delta$  7.48-7.44 (m, 2H), 7.12-7.08 (m, 2H), 5.75 (d,  $J = 47.5$  Hz, 1H), 4.32-4.18 (m, 2H), 1.26 (t,  $J =$

7.1 Hz, 3H).  $^{13}\text{C}$  NMR (101 MHz,  $\text{CDCl}_3$ )  $\delta$  168.5 (d,  $J = 27.7$  Hz), 163.5 (dd,  $J = 248.9$ , 2.4 Hz), 130.3 (dd,  $J = 21.0$ , 3.3 Hz), 128.8 (dd,  $J = 8.5$ , 6.0 Hz), 115.9 (d,  $J = 21.9$  Hz), 88.8 (d,  $J = 185.8$  Hz), 62.0, 14.1.  $^{19}\text{F}$  NMR (376 MHz,  $\text{CDCl}_3$ )  $\delta$  -111.3 (d,  $J = 3.8$  Hz), -178.4 (d,  $J = 3.8$  Hz).

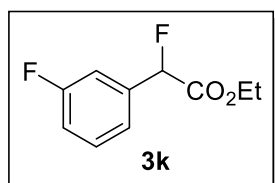

The product **3k**<sup>8</sup> was purified with silica gel chromatography (PE/EA = 30:1) as a colorless oil (36 mg, 90% yield).  $^1\text{H}$  NMR (400 MHz,  $\text{CDCl}_3$ )  $\delta$  7.41-7.36 (m, 1H), 7.25 (d,  $J = 6.4$  Hz, 1H), 7.20 (d,  $J = 9.2$  Hz, 1H), 7.12-7.07 (m, 1H), 5.77 (d,  $J = 47.5$  Hz, 1H), 4.33-4.19 (m, 2H), 1.27 (t,  $J = 7.1$  Hz, 3H).  $^{13}\text{C}$  NMR (101 MHz,  $\text{CDCl}_3$ )  $\delta$  168.1 (d,  $J = 27.1$  Hz), 162.8 (d,  $J = 247.4$  Hz), 136.6 (dd,  $J = 21.0$ , 7.5 Hz), 130.5 (d,  $J = 8.1$  Hz), 122.2 (dd,  $J = 6.5$ , 3.1 Hz), 116.6 (dd,  $J = 21.1$ , 1.8 Hz), 113.6 (dd,  $J = 23.1$ , 6.9 Hz), 88.6 (dd,  $J = 187.0$ , 1.9 Hz), 62.2, 14.1.  $^{19}\text{F}$  NMR (376 MHz,  $\text{CDCl}_3$ )  $\delta$  -111.8, -182.0.

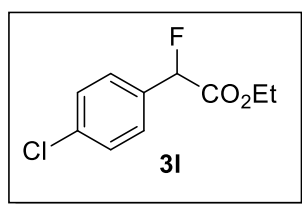

The product **3l**<sup>8</sup> was purified with silica gel chromatography (PE/EA = 30:1) as a colorless oil (38.5 mg, 91% yield).  $^1\text{H}$  NMR (400 MHz,  $\text{CDCl}_3$ )  $\delta$  7.42-7.37 (m, 4H), 5.74 (d,  $J = 47.5$  Hz, 1H), 4.31-4.17 (m, 2H), 1.25 (t,  $J = 7.1$  Hz, 3H).  $^{13}\text{C}$  NMR (101 MHz,  $\text{CDCl}_3$ )  $\delta$  168.2 (d,  $J = 27.4$  Hz), 135.7 (d,  $J = 2.5$  Hz), 132.8 (d,  $J = 20.9$  Hz), 129.1, 128.0 (d,  $J = 6.2$  Hz), 88.7 (d,  $J = 186.3$  Hz), 62.1, 14.1.  $^{19}\text{F}$  NMR (376 MHz,  $\text{CDCl}_3$ )  $\delta$  -180.8.

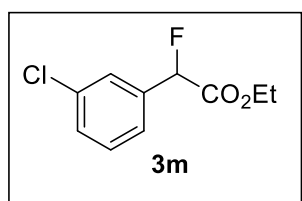

The product **3m** was purified with silica gel chromatography (PE/EA = 30:1) as a colorless oil (39.8 mg, 92% yield).  $^1\text{H}$  NMR (400 MHz,  $\text{CDCl}_3$ )  $\delta$  7.48 (s, 1H), 7.40-7.32 (m, 3H), 5.75 (d,  $J = 47.5$  Hz, 1H), 4.33-4.19 (m, 2H), 1.27 (t,  $J = 7.1$  Hz, 3H).  $^{13}\text{C}$  NMR (101 MHz,  $\text{CDCl}_3$ )  $\delta$  168.0 (d,  $J = 27.1$  Hz), 136.2 (d,  $J = 20.9$  Hz), 134.8, 130.1, 129.8 (d,  $J = 1.8$  Hz), 126.7 (d,  $J = 6.9$  Hz), 124.7 (d,  $J = 6.4$  Hz), 88.6 (d,  $J = 187.2$  Hz), 62.2, 14.1.  $^{19}\text{F}$  NMR (376 MHz,  $\text{CDCl}_3$ )  $\delta$  -182.1. HRMS (ESI) calcd. for  $\text{C}_{10}\text{H}_{10}\text{ClFO}_2$   $[\text{M}+\text{H}]^+$  239.0251, found: 239.0248.

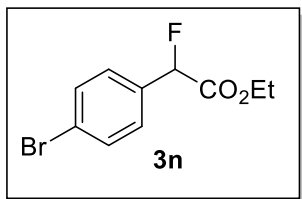

The product **3n**<sup>8</sup> was purified with silica gel chromatography (PE/EA = 20:1) as a colorless oil (43.8 mg, 84% yield). <sup>1</sup>H NMR (400 MHz, CDCl<sub>3</sub>) δ 7.55 (d, *J* = 8.3 Hz, 2H), 7.35 (d, *J* = 8.2 Hz, 2H), 5.73 (d, *J* = 47.5 Hz, 1H), 4.31-4.17 (m, 2H), 1.26 (t, *J* = 7.1 Hz, 3H). <sup>13</sup>C NMR (101 MHz, CDCl<sub>3</sub>) δ 168.1 (d, *J* = 27.3 Hz), 133.4 (d, *J* = 20.9 Hz), 132.0, 128.2 (d, *J* = 6.2 Hz), 123.9 (d, *J* = 2.6 Hz), 88.7 (d, *J* = 186.6 Hz), 62.1, 14.1. <sup>19</sup>F NMR (376 MHz, CDCl<sub>3</sub>) δ -181.3.

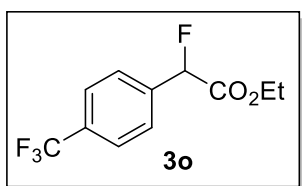

The product **3o**<sup>8</sup> was purified with silica gel chromatography (PE/EA = 30:1) as a colorless oil (45 mg, 90% yield). <sup>1</sup>H NMR (400 MHz, CDCl<sub>3</sub>) δ 7.68 (d, *J* = 8.4 Hz, 2H), 7.61 (d, *J* = 8.2 Hz, 2H), 5.85 (d, *J* = 47.5 Hz, 1H), 4.33-4.19 (m, 2H), 1.27 (t, *J* = 7.1 Hz, 3H). <sup>13</sup>C NMR (101 MHz, CDCl<sub>3</sub>) δ 167.9 (d, *J* = 26.7 Hz), 138.2 (d, *J* = 20.9 Hz), 131.7 (q, *J* = 34.3 Hz), 126.8 (d, *J* = 6.8 Hz), 125.8 (q, *J* = 3.8 Hz), 123.9 (q, *J* = 270.7 Hz), 88.6 (d, *J* = 187.5 Hz), 62.3, 14.1. <sup>19</sup>F NMR (376 MHz, CDCl<sub>3</sub>) δ -62.8, -184.2.

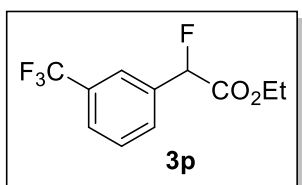

The product **3p**<sup>8</sup> was purified with silica gel chromatography (PE/EA = 30:1) as a colorless oil (46.5 mg, 93% yield). <sup>1</sup>H NMR (400 MHz, CDCl<sub>3</sub>) δ 7.75 (s, 1H), 7.69-7.66 (m, 2H), 7.55 (t, *J* = 7.8 Hz, 1H), 5.84 (d, *J* = 47.4 Hz, 1H), 4.33-4.16 (m, 2H), 1.27 (t, *J* = 7.1 Hz, 3H). <sup>13</sup>C NMR (101 MHz, CDCl<sub>3</sub>) δ 167.9 (d, *J* = 26.9 Hz), 135.4 (d, *J* = 21.1 Hz), 131.4 (q, *J* = 32.7 Hz), 129.8 (dd, *J* = 6.4, 1.0 Hz), 129.4, 126.5-126.4 (m, 1C), 123.8 (q, *J* = 270.9 Hz), 123.5-123.3 (m, 1C), 88.6 (d, *J* = 187.4 Hz), 62.3, 14.1. <sup>19</sup>F NMR (376 MHz, CDCl<sub>3</sub>) δ -62.8, -183.2.

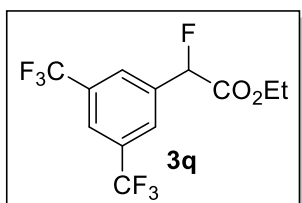

The product **3q**<sup>9</sup> was purified with silica gel chromatography (PE/EA = 30:1) as a colorless oil (55.4 mg, 87% yield). <sup>1</sup>H NMR (400 MHz, CDCl<sub>3</sub>) δ 7.96 (s, 2H), 7.92 (s, 1H), 5.92 (d, *J* = 47.0 Hz, 1H), 4.35-4.23 (m, 2H), 1.29 (t, *J* = 7.1 Hz, 3H). <sup>13</sup>C NMR (101 MHz, CDCl<sub>3</sub>) δ 167.1 (d, *J* = 26.3 Hz), 136.9 (d, *J* = 21.7 Hz), 132.4 (q, *J* = 33.9 Hz), 126.5-126.4 (m, 1C), 123.6-123.3 (m, 1C), 123.1 (q, *J* = 272.8 Hz), 87.92 (d, *J* = 189.8 Hz), 62.7, 14.1. <sup>19</sup>F NMR (376 MHz, CDCl<sub>3</sub>) δ -63.1,

-186.3 (d,  $J = 47.0$  Hz).

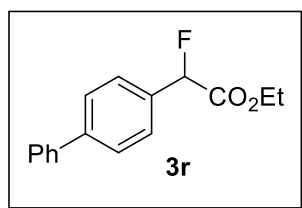

The product **3r**<sup>8</sup> was purified with silica gel chromatography (PE/EA = 30:1) as a colorless oil (47 mg, 91% yield). <sup>1</sup>H NMR (400 MHz, CDCl<sub>3</sub>)  $\delta$  7.65-7.54 (m, 6H), 7.47-7.44 (m, 2H), 7.37 (tt,  $J = 7.2, 2.0$  Hz, 1H), 5.83 (d,  $J = 47.7$  Hz, 1H), 4.35-4.20 (m, 2H), 1.29 (t,  $J = 7.1$  Hz, 3H). <sup>13</sup>C NMR (101 MHz, CDCl<sub>3</sub>)  $\delta$  168.7 (d,  $J = 27.6$  Hz), 142.6 (d,  $J = 2.3$  Hz), 140.3, 133.3 (d,  $J = 20.5$  Hz), 128.9, 127.8, 127.6, 127.3, 127.2, 89.3 (d,  $J = 185.4$  Hz), 62.0, 14.2. <sup>19</sup>F NMR (376 MHz, CDCl<sub>3</sub>)  $\delta$  -179.4.

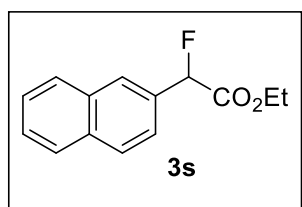

The product **3s**<sup>8</sup> was purified with silica gel chromatography (PE/EA = 20:1) as a colorless solid (41.8 mg, 90% yield). <sup>1</sup>H NMR (400 MHz, CDCl<sub>3</sub>)  $\delta$  7.97 (s, 1H), 7.91-7.85 (m, 3H), 7.58 (dd,  $J = 8.5, 1.5$  Hz, 1H), 7.56-7.51 (m, 2H), 5.96 (d,  $J = 47.7$  Hz, 1H), 4.34-4.19 (m, 2H), 1.26 (t,  $J = 7.1$  Hz, 3H). <sup>13</sup>C NMR (101 MHz, CDCl<sub>3</sub>)  $\delta$  168.6 (d,  $J = 27.7$  Hz), 133.7 (d,  $J = 1.4$  Hz), 133.0, 131.7 (d,  $J = 20.3$  Hz), 128.8, 128.4, 127.9, 127.0, 126.7, 126.7 (d,  $J = 5.8$  Hz), 123.6 (d,  $J = 5.0$  Hz), 89.6 (d,  $J = 185.5$  Hz), 62.0, 14.1. <sup>19</sup>F NMR (376 MHz, CDCl<sub>3</sub>)  $\delta$  -179.2.

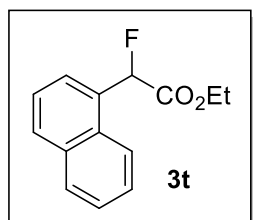

The product **3t** was purified with silica gel chromatography (PE/EA = 30:1) as a colorless oil (34.8 mg, 75% yield). <sup>1</sup>H NMR (400 MHz, CDCl<sub>3</sub>)  $\delta$  8.21 (d,  $J = 8.4$  Hz, 1H), 7.91 (t,  $J = 7.5$  Hz, 2H), 7.63-7.48 (m, 4H), 6.37 (d,  $J = 47.1$  Hz, 1H), 4.34-4.15 (m, 2H), 1.21 (t,  $J = 7.1$  Hz, 3H). <sup>13</sup>C NMR (101 MHz, CDCl<sub>3</sub>)  $\delta$  169.0 (d,  $J = 27.6$  Hz), 133.9, 130.7 (d,  $J = 1.6$  Hz), 130.6 (d,  $J = 2.4$  Hz), 130.3 (d,  $J = 18.7$  Hz), 128.9, 127.1, 126.9 (d,  $J = 8.0$  Hz), 126.3, 125.2, 123.8 (d,  $J = 1.3$  Hz), 88.7 (d,  $J = 185.2$  Hz), 62.1, 14.1. <sup>19</sup>F NMR (376 MHz, CDCl<sub>3</sub>)  $\delta$  -177.6. HRMS (ESI) calcd. for C<sub>14</sub>H<sub>13</sub>FO<sub>2</sub>Na [M+Na]<sup>+</sup> 255.0797, found: 255.0798.

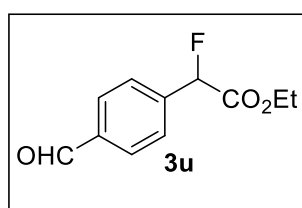

The product **3u**<sup>8</sup> was purified with silica gel chromatography (PE/EA = 30:1) as a colorless solid (33.6 mg, 80% yield). <sup>1</sup>H NMR (400 MHz, CDCl<sub>3</sub>)  $\delta$  10.0 (s, 1H), 7.92 (d,  $J = 7.9$  Hz, 2H), 7.64 (d,  $J = 7.9$  Hz, 2H), 5.86 (d,  $J$

= 47.5 Hz, 1H), 4.31-4.17 (m, 2H), 1.25 (t,  $J = 7.1$  Hz, 3H).  $^{13}\text{C}$  NMR (101 MHz,  $\text{CDCl}_3$ )  $\delta$  191.7, 167.8 (d,  $J = 26.7$  Hz), 140.5 (d,  $J = 20.4$  Hz), 137.0, 130.1, 126.9 (d,  $J = 6.9$  Hz), 88.8 (d,  $J = 187.7$  Hz), 62.3, 14.1.  $^{19}\text{F}$  NMR (376 MHz,  $\text{CDCl}_3$ )  $\delta$  -184.7.

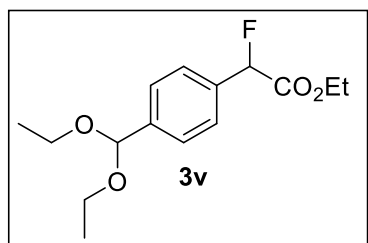

The product **3v** was purified with silica gel chromatography (PE/EA = 30:1) as a colorless oil (48.3 mg, 85% yield).  $^1\text{H}$  NMR (400 MHz,  $\text{CDCl}_3$ )  $\delta$  7.52 (d,  $J = 8.2$  Hz, 2H), 7.46 (d,  $J = 8.2$  Hz, 2H), 5.77 (d,  $J = 47.8$  Hz, 1H), 5.50 (s, 1H), 4.30-4.15 (m, 2H), 3.67-3.49 (m, 4H), 1.27-1.21 (m, 9H).  $^{13}\text{C}$  NMR (101 MHz,  $\text{CDCl}_3$ )  $\delta$  168.6 (d,  $J = 27.6$  Hz), 140.7 (d,  $J = 2.1$  Hz), 134.3 (d,  $J = 20.5$  Hz), 127.2, 126.6 (d,  $J = 6.1$  Hz), 101.2, 89.2 (d,  $J = 185.4$  Hz), 61.9, 61.3, 15.3, 14.1.  $^{19}\text{F}$  NMR (376 MHz,  $\text{CDCl}_3$ )  $\delta$  -180.0. HRMS (ESI): calcd. for  $\text{C}_{15}\text{H}_{21}\text{FO}_4\text{Na}$   $[\text{M}+\text{Na}]^+$  307.1322, found: 307.1324.

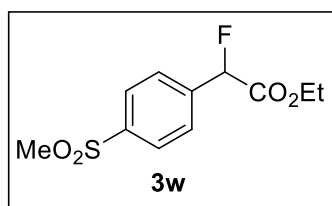

The product **3w** was purified with silica gel chromatography (PE/EA = 10:1) as a colorless solid (46.8 mg, 90% yield).  $^1\text{H}$  NMR (400 MHz,  $\text{CDCl}_3$ )  $\delta$  7.98 (d,  $J = 8.1$  Hz, 2H), 7.69 (d,  $J = 8.1$  Hz, 2H), 5.87 (d,  $J = 47.4$  Hz, 1H), 4.32-4.18 (m, 2H), 3.06 (s, 3H), 1.26 (t,  $J = 7.1$  Hz, 3H).  $^{13}\text{C}$  NMR (101 MHz,  $\text{CDCl}_3$ )  $\delta$  167.5 (d,  $J = 26.5$  Hz), 141.6 (d,  $J = 1.5$  Hz), 140.1 (d,  $J = 20.8$  Hz), 127.9, 127.2 (d,  $J = 7.0$  Hz), 88.4 (d,  $J = 188.5$  Hz), 62.5, 44.5, 14.1.  $^{19}\text{F}$  NMR (376 MHz,  $\text{CDCl}_3$ )  $\delta$  -185.5. HRMS (ESI) calcd. for  $\text{C}_{11}\text{H}_{14}\text{FO}_4\text{S}$   $[\text{M}+\text{H}]^+$  261.0597, found: 261.0596.

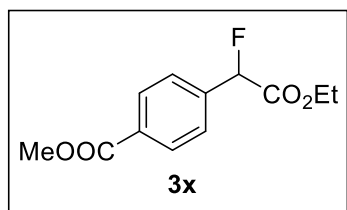

The product **3x** was purified with silica gel chromatography (PE/EA = 30:1) as a colorless oil (41.3 mg, 86% yield).  $^1\text{H}$  NMR (400 MHz,  $\text{CDCl}_3$ )  $\delta$  8.07 (d,  $J = 8.1$  Hz, 2H), 7.55 (d,  $J = 8.1$  Hz, 2H), 5.83 (d,  $J = 47.6$  Hz, 1H), 4.30-4.17 (m, 2H), 3.92 (s, 3H), 1.25 (t,  $J = 7.1$  Hz, 3H).  $^{13}\text{C}$  NMR (101 MHz,  $\text{CDCl}_3$ )  $\delta$  168.0 (d,  $J = 26.8$  Hz), 166.5, 138.9 (d,  $J = 20.5$  Hz), 131.2 (d,  $J = 1.7$  Hz), 130.1, 126.4 (d,  $J = 6.7$  Hz), 88.9 (d,  $J = 187.2$  Hz), 62.2, 52.4, 14.1.  $^{19}\text{F}$  NMR (376 MHz,  $\text{CDCl}_3$ )  $\delta$  -183.9. HRMS (ESI) calcd. for  $\text{C}_{12}\text{H}_{14}\text{FO}_4$   $[\text{M}+\text{H}]^+$  241.0876, found: 241.0877.

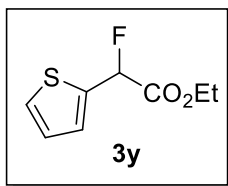

The product **3y** was purified with silica gel chromatography (PE/EA = 30:1) as a yellow oil (24.8 mg, 66% yield).  $^1\text{H}$  NMR (400 MHz,  $\text{CDCl}_3$ )  $\delta$  7.42 (dt,  $J = 5.1, 1.4$  Hz, 1H), 7.24-7.22 (m, 1H), 7.05-7.03 (m, 1H), 5.99 (d,  $J = 48.5$  Hz, 1H), 4.37-4.24 (m, 2H), 1.31 (t,  $J = 7.1$  Hz, 3H).  $^{13}\text{C}$  NMR (101 MHz,  $\text{CDCl}_3$ )  $\delta$  167.7 (d,  $J = 28.2$  Hz), 135.6 (d,  $J = 23.0$  Hz), 128.7 (d,  $J = 5.4$  Hz), 128.3 (d,  $J = 3.2$  Hz), 127.2 (d,  $J = 2.1$  Hz), 84.9 (d,  $J = 185.8$  Hz), 62.3, 14.1.  $^{19}\text{F}$  NMR (376 MHz,  $\text{CDCl}_3$ )  $\delta$  -164.4. HRMS (ESI) calcd. for  $\text{C}_8\text{H}_9\text{FO}_2\text{SNa}$   $[\text{M}+\text{Na}]^+$  211.0205, found: 211.0203.

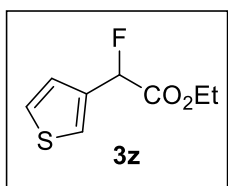

The product **3z** was purified with silica gel chromatography (PE/EA = 30:1) as a yellow oil (28.6 mg, 76% yield).  $^1\text{H}$  NMR (400 MHz,  $\text{CDCl}_3$ )  $\delta$  7.47-7.46 (m, 1H), 7.37-7.34 (m, 1H), 7.17 (d,  $J = 5.0$  Hz, 1H), 5.87 (d,  $J = 48.1$  Hz, 1H), 4.34-4.21 (m, 2H), 1.29 (t,  $J = 7.1$  Hz, 3H).  $^{13}\text{C}$  NMR (101 MHz,  $\text{CDCl}_3$ )  $\delta$  168.3 (d,  $J = 27.0$  Hz), 134.9 (d,  $J = 22.4$  Hz), 126.9, 125.7 (d,  $J = 3.4$  Hz), 124.9 (d,  $J = 7.4$  Hz), 85.7 (d,  $J = 184.2$  Hz), 62.0, 14.1.  $^{19}\text{F}$  NMR (376 MHz,  $\text{CDCl}_3$ )  $\delta$  -176.2. HRMS (ESI) calcd. for  $\text{C}_8\text{H}_9\text{FO}_2\text{SNa}$   $[\text{M}+\text{Na}]^+$  211.0205, found: 211.0202.

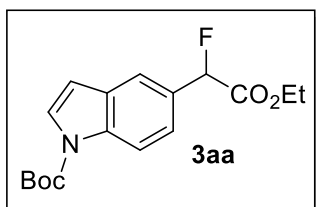

The product **3aa** was purified with silica gel chromatography (PE/EA = 5:1) as a colorless oil (50.8 mg, 79% yield).  $^1\text{H}$  NMR (400 MHz,  $\text{CDCl}_3$ )  $\delta$  8.18 (d,  $J = 8.6$  Hz, 1H), 7.67 (s, 1H), 7.63 (d,  $J = 3.7$  Hz, 1H), 7.41 (d,  $J = 8.6$  Hz, 1H), 6.59 (d,  $J = 3.7$  Hz, 1H), 5.85 (d,  $J = 47.8$  Hz, 1H), 4.32-4.16 (m, 2H), 1.67 (s, 9H), 1.25 (t,  $J = 7.1$  Hz, 3H).  $^{13}\text{C}$  NMR (101 MHz,  $\text{CDCl}_3$ )  $\delta$  169.0 (d,  $J = 28.5$  Hz), 149.6, 135.8, 130.8, 128.7 (d,  $J = 20.7$  Hz), 127.0, 123.0 (d,  $J = 5.1$  Hz), 119.9 (d,  $J = 6.2$  Hz), 115.6, 107.4, 89.8 (d,  $J = 185.0$  Hz), 84.5, 61.8, 28.2, 14.1.  $^{19}\text{F}$  NMR (376 MHz,  $\text{CDCl}_3$ )  $\delta$  -175.2. HRMS (ESI) calcd. for  $\text{C}_{17}\text{H}_{20}\text{FNO}_4\text{Na}$   $[\text{M}+\text{Na}]^+$  344.1274, found: 344.1272.

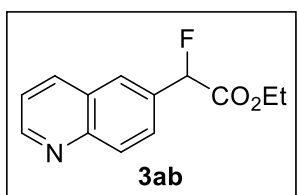

The product **3ab** was purified with silica gel chromatography (PE/EA = 3:1) as a colorless oil (40.1 mg, 86% yield).  $^1\text{H}$  NMR (400 MHz,  $\text{CDCl}_3$ )  $\delta$  8.94 (dd,  $J = 4.2, 1.6$  Hz, 1H), 8.17 (d,  $J = 8.3$  Hz, 1H), 8.13 (d,  $J = 8.8$  Hz, 1H), 7.93 (s,

1H), 7.79 (dd,  $J = 8.8, 1.8$  Hz, 1H), 7.43 (dd,  $J = 8.3, 4.2$  Hz, 1H), 5.96 (d,  $J = 47.5$  Hz, 1H), 4.32-4.17 (m, 2H), 1.24 (t,  $J = 7.1$  Hz, 3H).  $^{13}\text{C}$  NMR (101 MHz,  $\text{CDCl}_3$ )  $\delta$  168.3 (d,  $J = 27.2$  Hz), 151.4, 148.5 (d,  $J = 1.4$  Hz), 136.5, 132.6 (d,  $J = 20.5$  Hz), 130.3, 127.9, 127.2 (d,  $J = 5.2$  Hz), 126.2 (d,  $J = 7.6$  Hz), 121.8, 89.1 (d,  $J = 186.7$  Hz), 62.2, 14.1.  $^{19}\text{F}$  NMR (376 MHz,  $\text{CDCl}_3$ )  $\delta$  -181.2. HRMS (ESI) calcd. for  $\text{C}_{13}\text{H}_{13}\text{FNO}_2$   $[\text{M}+\text{H}]^+$  234.0930, found: 234.0932.

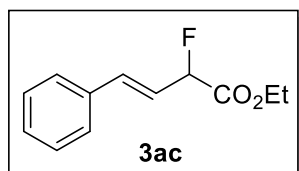

The product **3ac**<sup>8</sup> was purified with silica gel chromatography (PE/EA = 30:1) as a colorless oil (24.1 mg, 58% yield).  $^1\text{H}$  NMR (400 MHz,  $\text{CDCl}_3$ )  $\delta$  7.43 (m, 2H), 7.37-7.28 (m, 3H), 6.85 (dd,  $J = 16.0, 2.7$  Hz, 1H), 6.29 (ddd,  $J = 16.0, 14.2, 6.5$  Hz, 1H), 5.44 (ddd,  $J = 48.1, 6.5, 1.2$  Hz, 1H), 4.33-4.25 (m, 2H), 1.36 (t,  $J = 7.2$  Hz, 3H).  $^{13}\text{C}$  NMR (101 MHz,  $\text{CDCl}_3$ )  $\delta$  168.5 (d,  $J = 25.8$  Hz), 135.5 (d,  $J = 11.4$  Hz), 135.4 (d,  $J = 1.2$  Hz), 128.9, 128.8, 127.0 (d,  $J = 1.1$  Hz), 121.1 (d,  $J = 19.1$  Hz), 88.7 (d,  $J = 183.6$  Hz), 62.0, 14.2.  $^{19}\text{F}$  NMR (376 MHz,  $\text{CDCl}_3$ )  $\delta$  -183.7.

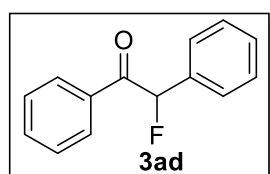

The product **3ad**<sup>10</sup> was purified with silica gel chromatography (PE/EA = 20:1) as a white solid (25.7 mg, 60% yield).  $^1\text{H}$  NMR (400 MHz,  $\text{CDCl}_3$ )  $\delta$  7.94 (d,  $J = 7.7$  Hz, 2H), 7.55 (t,  $J = 7.4$  Hz, 1H), 7.50-7.48 (m, 2H), 7.44-7.37 (m, 5H), 6.52 (d,  $J = 48.6$  Hz, 1H).  $^{13}\text{C}$  NMR (101 MHz,  $\text{CDCl}_3$ )  $\delta$  194.4 (d,  $J = 21.4$  Hz), 134.3 (d,  $J = 19.9$  Hz), 134.1, 133.9, 129.7 (d,  $J = 2.7$  Hz), 129.2, 129.2, 128.8, 127.5 (d,  $J = 5.5$  Hz), 94.0 (d,  $J = 185.7$  Hz).  $^{19}\text{F}$  NMR (376 MHz,  $\text{CDCl}_3$ )  $\delta$  -175.8.

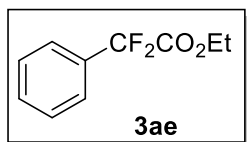

The product **3ae**<sup>11</sup> was purified with silica gel chromatography (PE/EA = 30:1) as a colorless oil (23.2 mg, 58% yield).  $^1\text{H}$  NMR (400 MHz,  $\text{CDCl}_3$ )  $\delta$  7.62-7.60 (m, 2H), 7.52-7.43 (m, 3H), 4.30 (q,  $J = 7.1$  Hz, 2H), 1.30 (t,  $J = 7.1$  Hz, 3H).  $^{13}\text{C}$  NMR (101 MHz,  $\text{CDCl}_3$ )  $\delta$  164.3 (t,  $J = 35.3$  Hz), 132.9 (t,  $J = 25.5$  Hz), 131.1 (t,  $J = 1.7$  Hz), 128.7, 125.5 (t,  $J = 6.2$  Hz), 113.5 (t,  $J = 252.0$  Hz), 63.2, 14.0.  $^{19}\text{F}$  NMR (376 MHz,  $\text{CDCl}_3$ )  $\delta$  -103.9

## Procedure of Monofluoroalkylation of Ezetimibe Derivative 5

To a 25 mL of Schlenk tube were added  $\text{Ni}(\text{dme})\text{Cl}_2$  (10 mol %, 0.01 mmol, 2.2 mg),



**L4** (12 mol %, 0.012 mmol, 3.2 mg) and CsF (5.0 equiv, 0.5 mmol, 76 mg) under air. The vessel was evacuated and backfilled with N<sub>2</sub> (3 times) and 1,4-dioxane (1.3 mL) was added via syringe. The mixture was stirred for 15 min, and then the ezetimibe derivative (1.2 equiv, 0.12 mmol, 72 mg) was added. After stirring for an additional 10 min, the BrCFHCO<sub>2</sub>Et (1.0 equiv, 0.1 mmol, 12  $\mu$ L) was added, and the reaction mixture was heated in a preheated oil bath at 80 °C for 24 h. The reaction mixture was cooled to room temperature, diluted with EtOAc and filtered through a pad of celite. The filtrate was concentrated under vacuum and purified by flash column chromatography (PE/EA = 3:1) to give **6** as a colorless oil (49 mg, 91%).

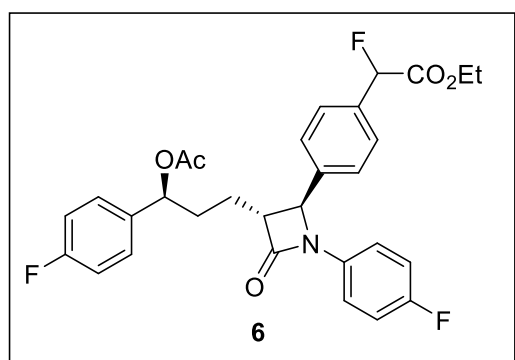

<sup>1</sup>H NMR (400 MHz, CDCl<sub>3</sub>)  $\delta$  7.49 (d,  $J$  = 8.0 Hz, 2H), 7.36 (d,  $J$  = 8.1 Hz, 2H), 7.28-7.25 (m, 2H), 7.22-7.18 (m, 2H), 7.01 (t,  $J$  = 8.6 Hz, 2H), 6.93 (t,  $J$  = 8.7 Hz, 2H), 5.78 (dd,  $J$  = 47.6, 2.6 Hz, 1H), 5.70 (t,  $J$  = 6.8 Hz, 1H), 4.62 (d,  $J$  = 2.1 Hz, 1H), 4.33-4.18

(m, 2H), 3.06 (td,  $J$  = 7.7, 1.6 Hz, 1H), 2.09-1.99 (m, 5H), 1.94-1.82 (m, 2H), 1.27 (td,  $J$  = 7.1, 1.7 Hz, 3H). <sup>13</sup>C NMR (101 MHz, CDCl<sub>3</sub>)  $\delta$  170.3, 168.3 (d,  $J$  = 27.1 Hz), 166.7, 162.5 (d,  $J$  = 246.8 Hz), 159.1 (d,  $J$  = 243.7 Hz), 139.1 (d,  $J$  = 2.0 Hz), 135.7 (d,  $J$  = 3.2 Hz), 134.9 (dd,  $J$  = 20.6, 1.0 Hz), 133.7 (d,  $J$  = 2.7 Hz), 128.3 (d,  $J$  = 8.2 Hz), 127.6 (dd,  $J$  = 6.2, 1.4 Hz), 126.3, 118.4 (d,  $J$  = 7.9 Hz), 116.0 (d,  $J$  = 22.7 Hz), 115.6 (d,  $J$  = 21.6 Hz), 88.9 (d,  $J$  = 186.4 Hz), 74.9, 62.1, 60.8 (d,  $J$  = 4.0 Hz), 60.2, 33.7, 25.0, 21.3, 14.1. <sup>19</sup>F NMR (376 MHz, CDCl<sub>3</sub>)  $\delta$  -113.7 (d,  $J$  = 2.8 Hz), -117.7 (d,  $J$  = 2.3 Hz), -180.8 (d,  $J$  = 23.2 Hz). HRMS (ESI) calcd. for C<sub>30</sub>H<sub>28</sub>F<sub>3</sub>NO<sub>5</sub>Na [M+Na]<sup>+</sup> 562.1817, found: 562.1821.

## Mechanistic studies

### 1. Radical Trapping Experiment with TEMPO

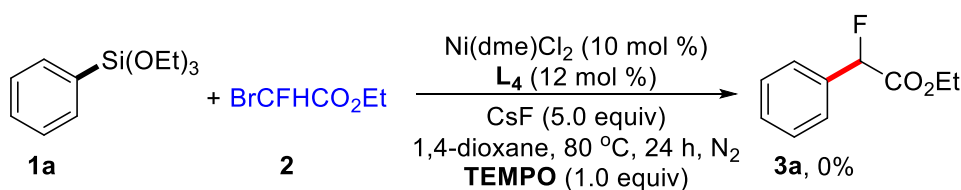

To a 25 mL of Schlenk tube were added Ni(dme)Cl<sub>2</sub> (10 mol %, 0.02 mmol, 4.4 mg), **L4** (12 mol %, 0.024 mmol, 6.5 mg) and CsF (5.0 equiv, 1 mmol, 152 mg) under air. The vessel was evacuated and backfilled with N<sub>2</sub> (3 times) and 1,4-dioxane (2.5 mL) was added via syringe. The mixture was stirred for 15 min, and then the **1a** (1.2 equiv, 0.3 mmol, 58 uL) was added. After stirring for an additional 10 min, the BrCFHCO<sub>2</sub>Et (1.0 equiv, 0.2 mmol, 24 uL) and TEMPO (1.0 equiv, 0.2 mmol, 31.3 mg) was added. The reaction mixture was heated in a preheated oil bath at 80 °C for 24 h. The reaction mixture was cooled to room temperature. No product **3a** was detected by crude <sup>19</sup>F NMR.

## 2. Procedure of Monofluoroalkylation of $\beta$ -pinene

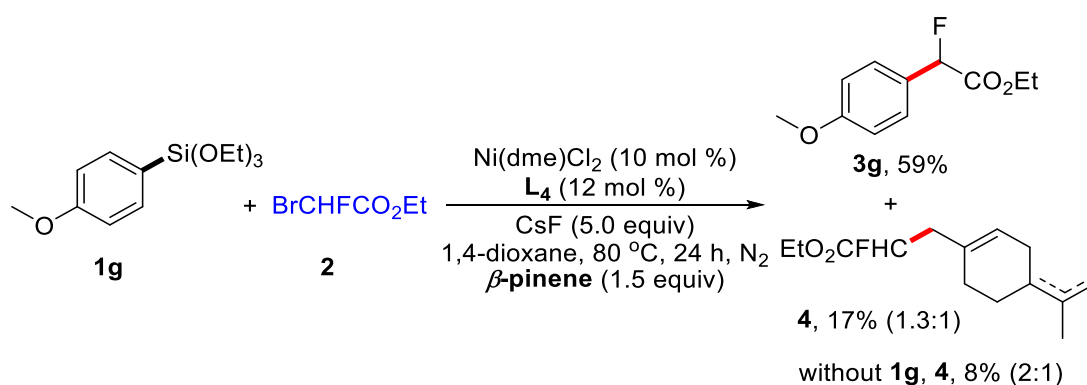

To a 25 mL of Schlenk tube were added Ni(dme)Cl<sub>2</sub> (10 mol %, 0.02 mmol, 4.4 mg), **L4** (12 mol %, 0.024 mmol, 6.5 mg) and CsF (5.0 equiv, 1 mmol, 152 mg) under air. The vessel was evacuated and backfilled with N<sub>2</sub> (3 times) and 1,4-dioxane (2.5 mL) was added via syringe. The mixture was stirred for 15 min, and then the arylsilane **1g** (1.2 equiv, 0.24 mmol) was added. After stirring for an additional 10 min, the BrCHFCO<sub>2</sub>Et (1.0 equiv, 0.2 mmol, 24 uL) and  $\beta$ -pinene (1.5 equiv, 0.3 mmol, 40.8 mg) was added. The reaction mixture was heated in a preheated oil bath at 80 °C for 24 h. The reaction mixture was cooled to room temperature, diluted with EtOAc and filtered through a pad of celite. The filtrate was concentrated under vacuum and purified by flash column chromatography (PE/EA = 40:1) to give product **3g** in 59% yield and ring-open diene product **4** in 17% yield (1.3:1 isomer ratio).

Without **1g**: **4** was obtained in 8% yield (2:1 isomer ratio).

**4** (mixture): <sup>1</sup>H NMR (400 MHz, CDCl<sub>3</sub>)  $\delta$  5.56 (d, *J* = 13.7 Hz, 1.08H), 5.07-5.01 (m,

0.55H), 4.94-4.89 (m, 0.55H), 4.71 (d,  $J = 6.4$  Hz, 1H), 4.27-4.21 (m, 2.15H), 2.76 (s, 1.03H), 2.54 (dt,  $J = 26.6, 5.9$  Hz, 2.21H), 2.32 (t,  $J = 6.3$  Hz, 1H), 2.13-1.80 (m, 4.73H), 1.73 (s, 1.48H), 1.68 (s, 1.57H), 1.64 (s, 1.57H), 1.32-1.27 (m, 3.77H).  $^{13}\text{C}$  NMR (101 MHz,  $\text{CDCl}_3$ )  $\delta$  170.0 (d,  $J = 23.7$  Hz), 149.9 (d,  $J = 5.0$  Hz), 132.1 (d,  $J = 2.0$  Hz), 131.6 (t,  $J = 1.8$  Hz), 126.9, 125.5, 125.4 (d,  $J = 5.3$  Hz), 122.4, 108.8 (d,  $J = 4.7$  Hz), 88.4 (d,  $J = 186.1$  Hz), 61.6, 40.8 (d,  $J = 4.3$  Hz), 40.6 (d,  $J = 21.2$  Hz), 30.9 (d,  $J = 3.5$  Hz), 29.9, 29.7, 29.1, 29.0, 27.8 (d,  $J = 1.9$  Hz), 26.6, 20.9, 20.3, 19.9, 14.3 (d,  $J = 5.2$  Hz).  $^{19}\text{F}$  NMR (376 MHz,  $\text{CDCl}_3$ )  $\delta$  -189.3 (d,  $J = 180.8$  Hz), -189.4. HRMS (ESI) calcd. for  $\text{C}_{14}\text{H}_{22}\text{FO}_2$   $[\text{M}+\text{H}]^+$  241.1604, found: 241.1602.

## References

- (1) (a) Yu, J.; Liu, J.; Shi, G.; Shao, C.; Zhang, Y. *Angew. Chem., Int. Ed.* **2015**, *54*, 4079. (b) Manoso, A. S.; Ahn, C.; Soheili, A.; Handy, C. J.; Correia, R.; Seganish, W. M.; DeShong, P. *J. Org. Chem.* **2004**, *69*, 8305.
- (2) Taylor, P. G.; Bassindale, A. R.; Aziz, Y.; Pourny, M.; Stevenson, R.; Hursthouse, M. B.; Coles, S. J. *Dalton Trans.* **2012**, *41*, 2048.
- (3) Diachun, N. A.; Marcus, A. H.; Hussey, D. M.; Fayer, M. D. *J. Am. Chem. Soc.* **1994**, *116*, 1027.
- (4) Jorapur, Y. R.; Shimada, T. *Synlett* **2012**, *23*, 1064.
- (5) (a) Ishida, S.; Ito, M.; Horiuchi, H.; Hiratsuka, H.; Shiraishi, S.; Kyushin, S. *Dalton Trans.* **2010**, *39*, 9421. (b) Swamy P, C. A.; Mukherjee, S.; Thilagar, P. *Chem. Commun.* **2013**, *49*, 993. (c) Swamy P, C. A.; Priyanka, R. N.; Thilagar, P. *Dalton Trans.* **2014**, *43*, 4067.
- (6) (a) Murata, M.; Ishikura, M.; Nagata, M.; Watanabe, S.; Masuda, Y. *Org. Lett.* **2002**, *4*, 1843. (b) Tang, P.; Ritter, T. *Tetrahedron*. **2011**, *67*, 4449.
- (7) Karabelas, K.; Hallberg, A. *J. Org. Chem.* **1986**, *51*, 5286.
- (8) Su, Y. -M.; Fen, G. -S.; Wang, Z. -Y.; Lan, Q.; Wang, X. -S. *Angew. Chem., Int. Ed.* **2015**, *54*, 6003.
- (9) Guo, C.; Yue, X.; Qing, F. -L. *Synthesis* **2010**, *11*, 1837.
- (10) Kitamura, T.; Muta, K.; Muta, K. *J. Org. Chem.* **2014**, *79*, 5842.

- (11) Xiao, Y.-L.; Guo, W.-H.; He, G.-Z.; Pan, Q.; Zhang, X. *Angew. Chem., Int. Ed.* **2014**, 53, 9909.

# NMR spectra of new compounds ( $^1\text{H}$ NMR, $^{13}\text{C}$ NMR, $^{19}\text{F}$ NMR)

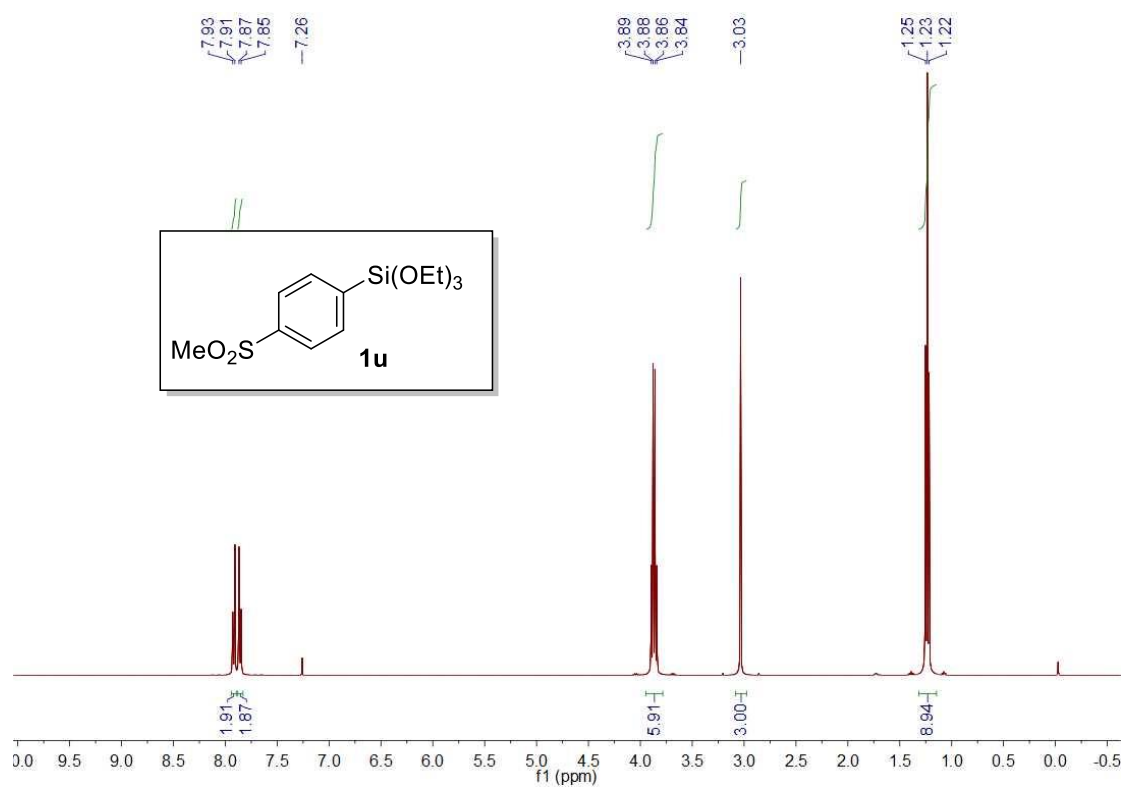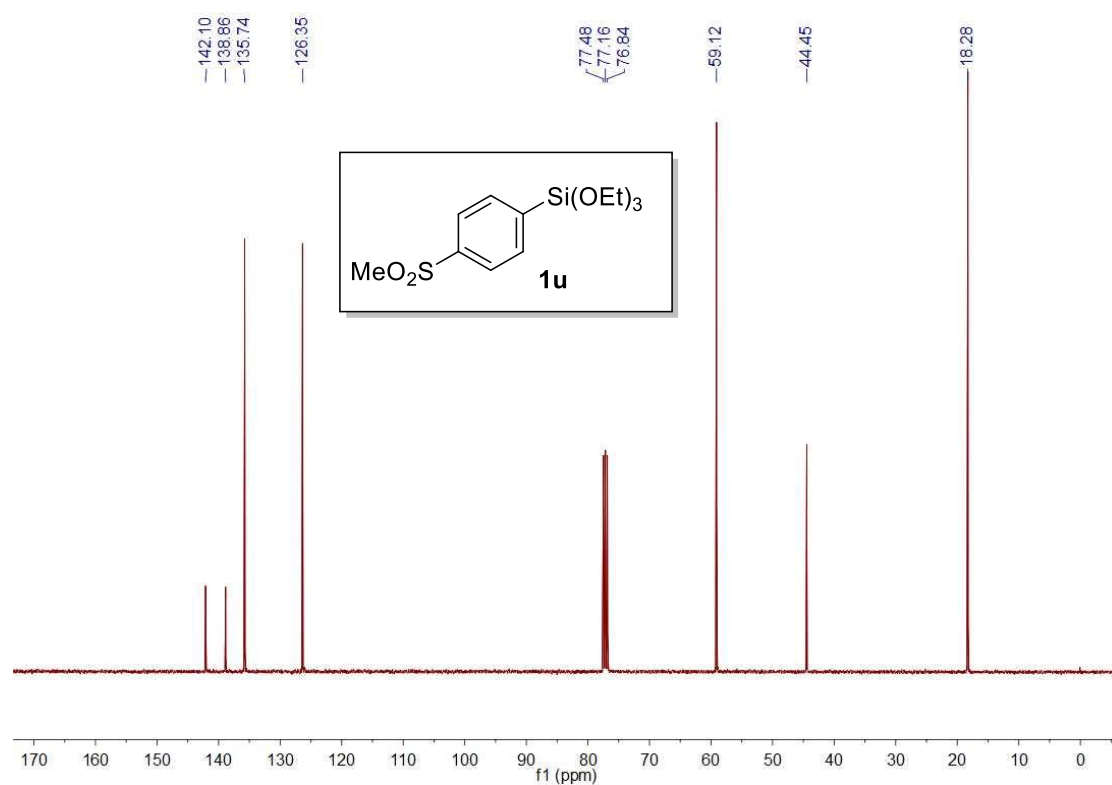

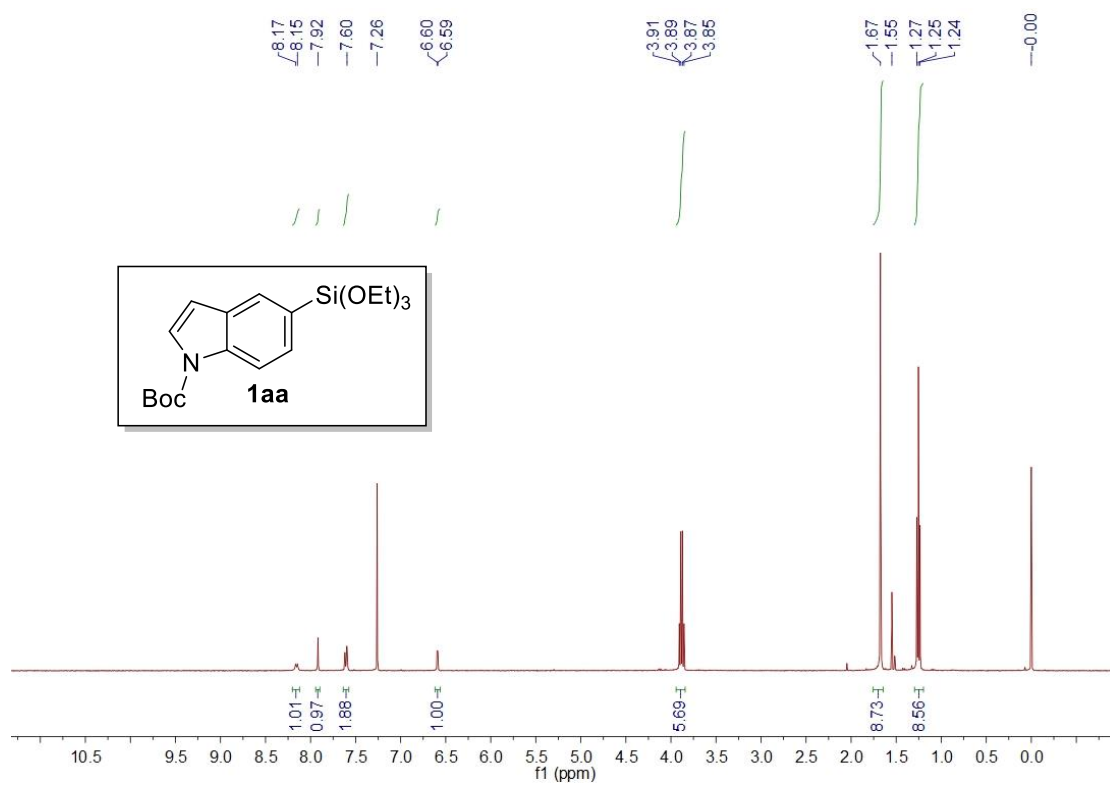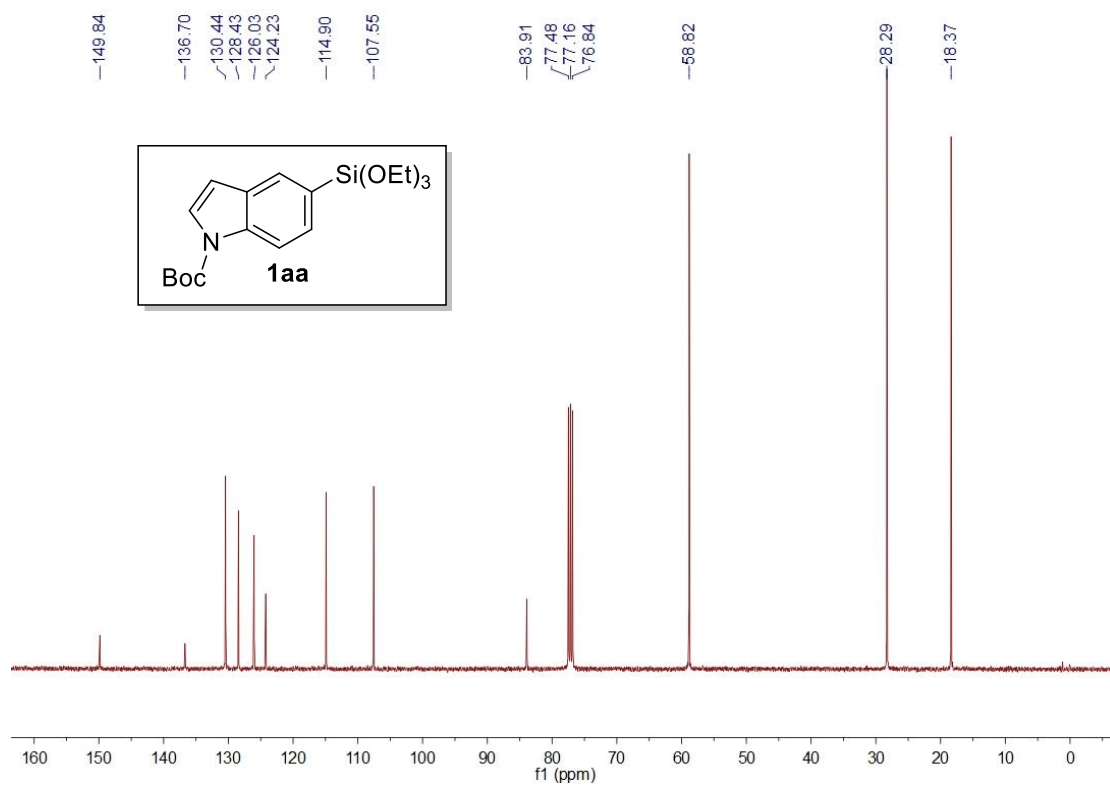

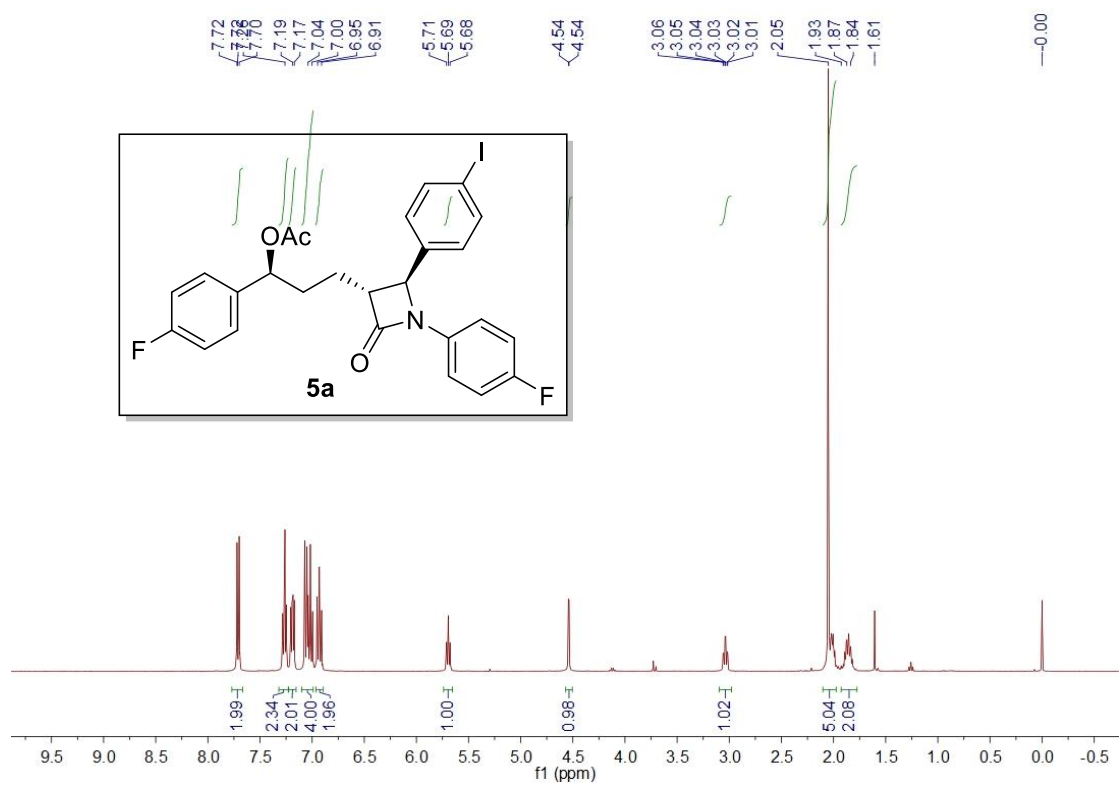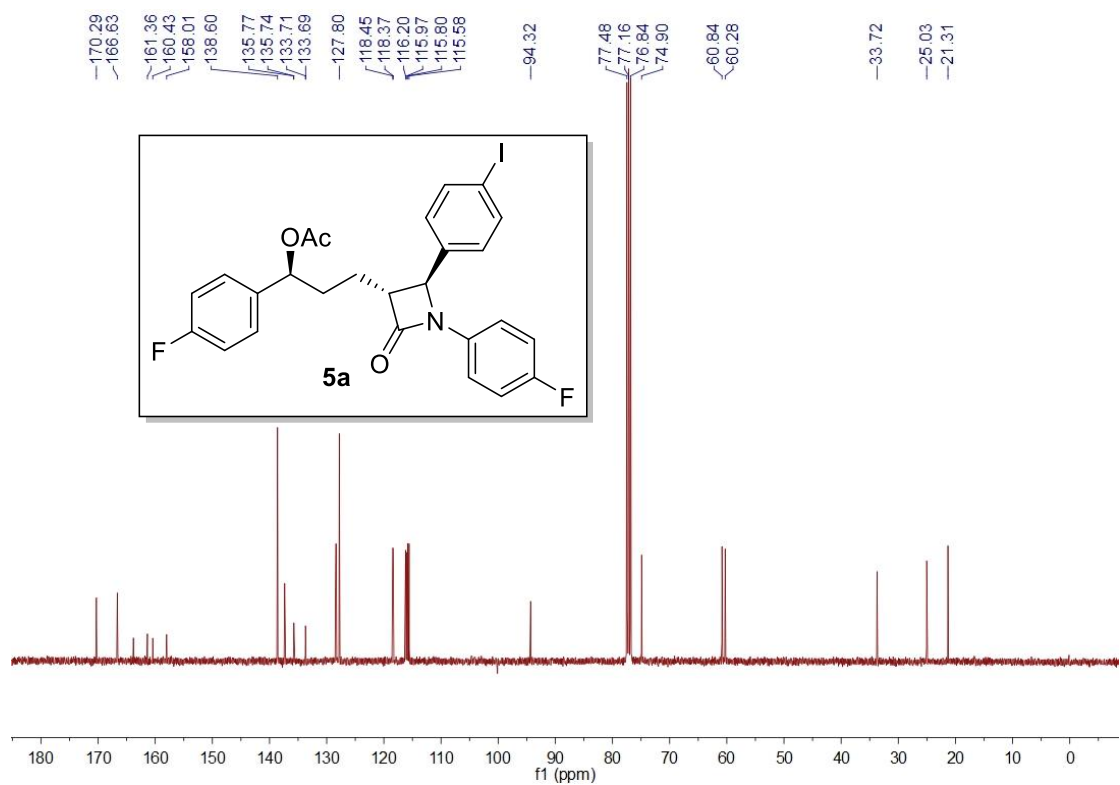

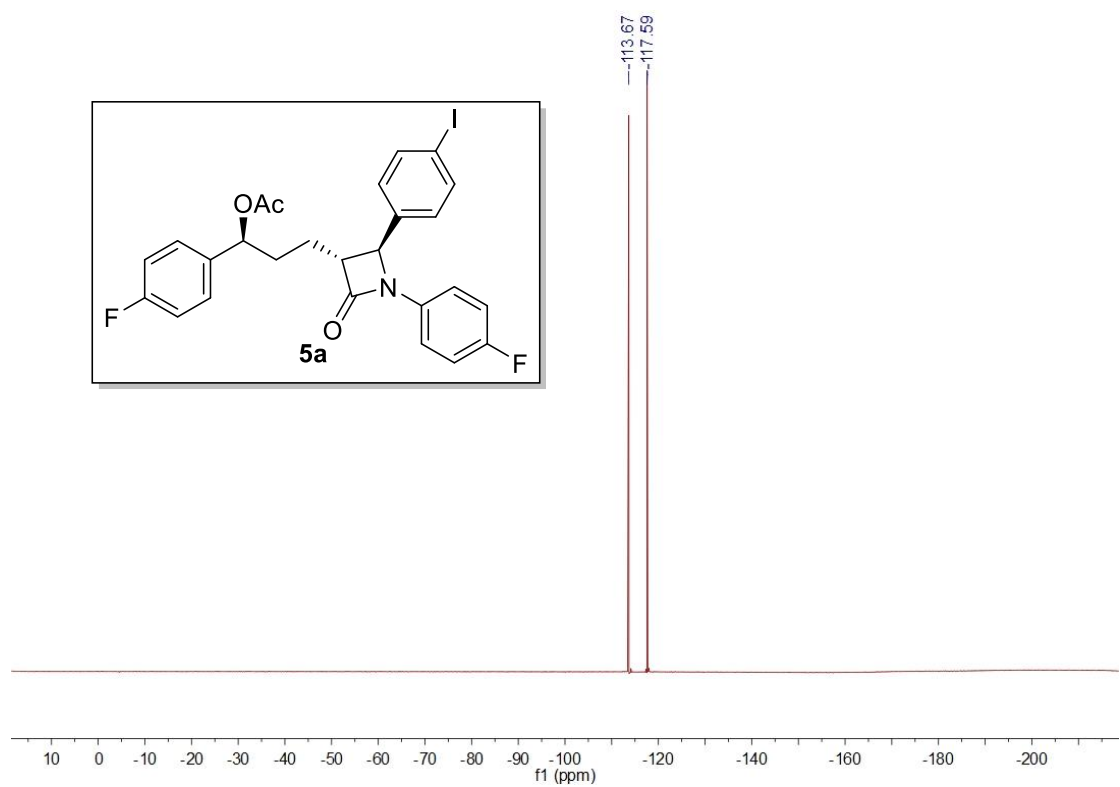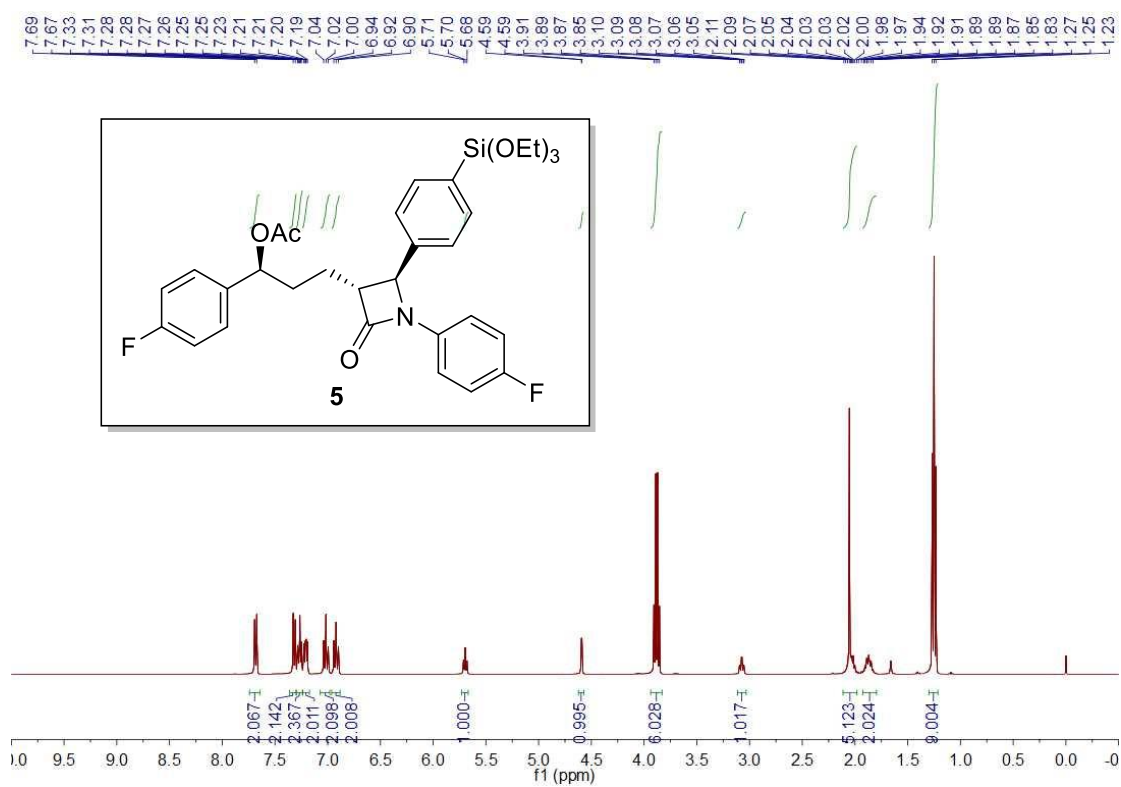



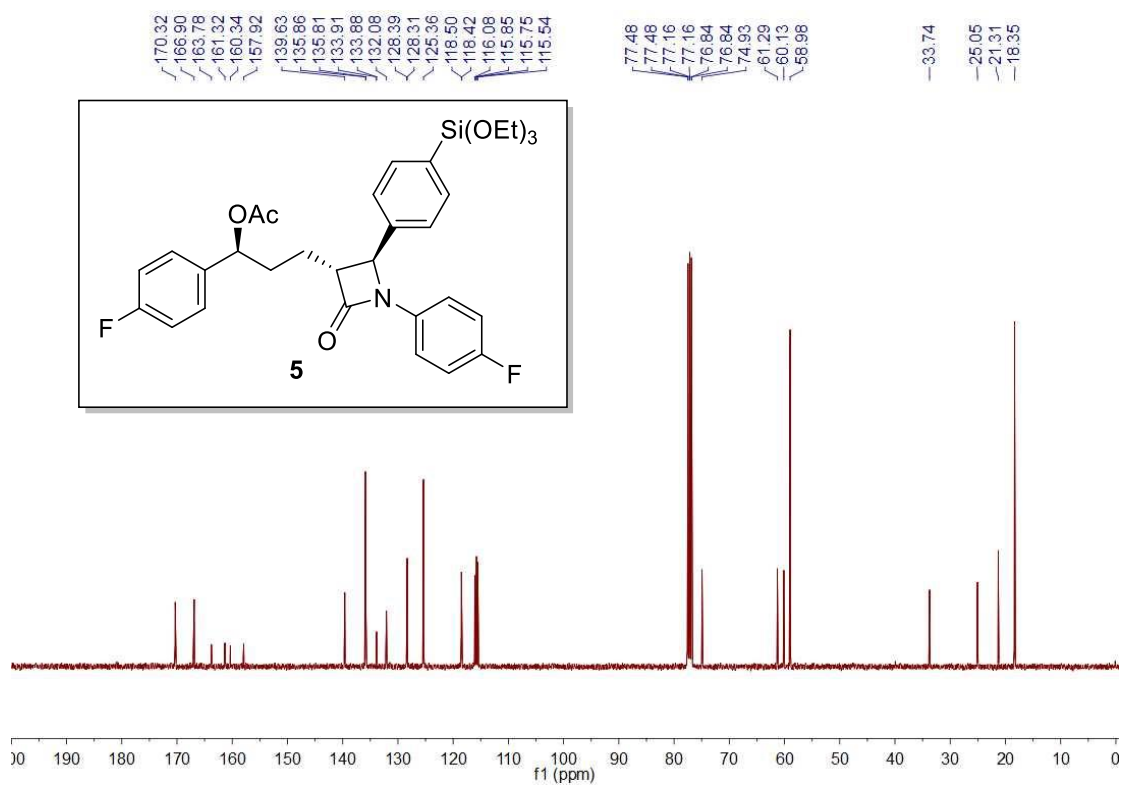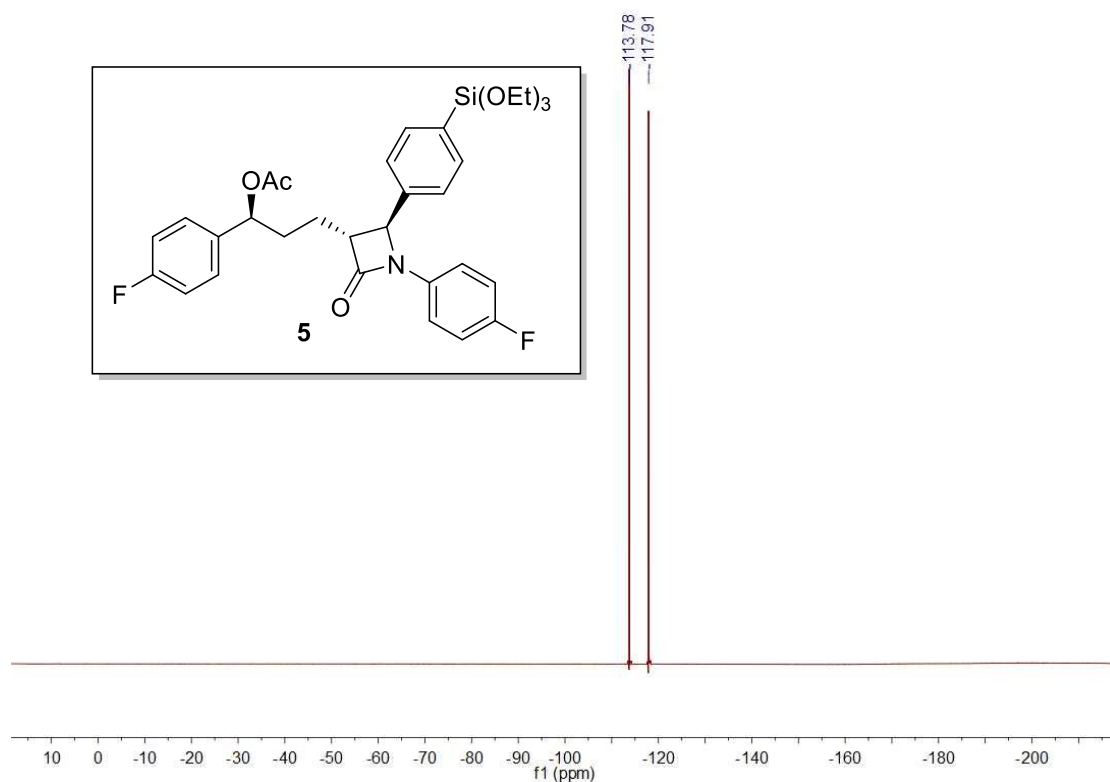

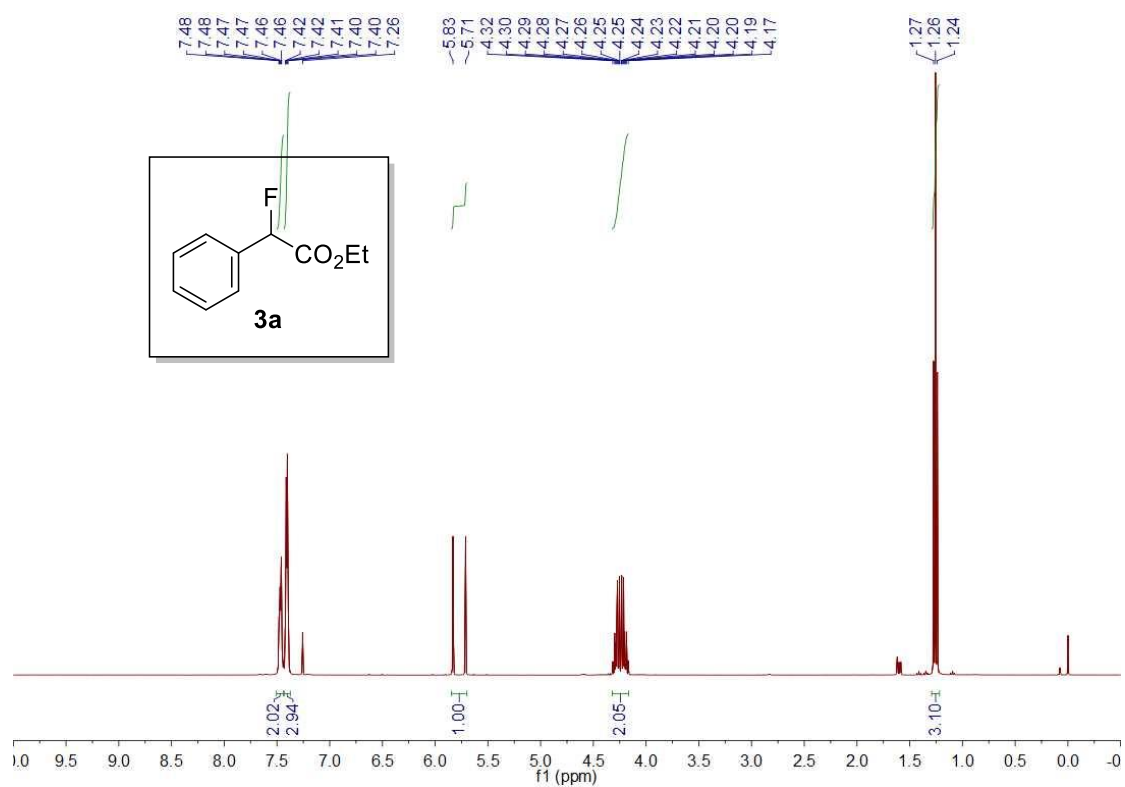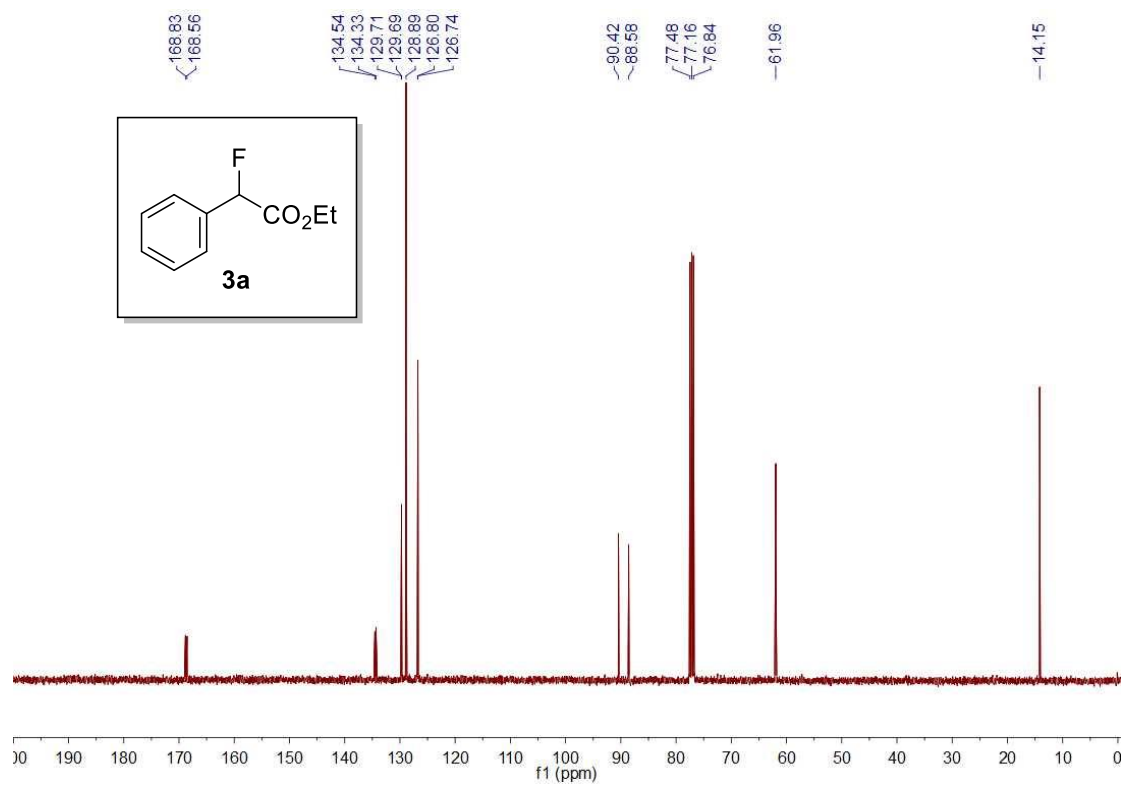

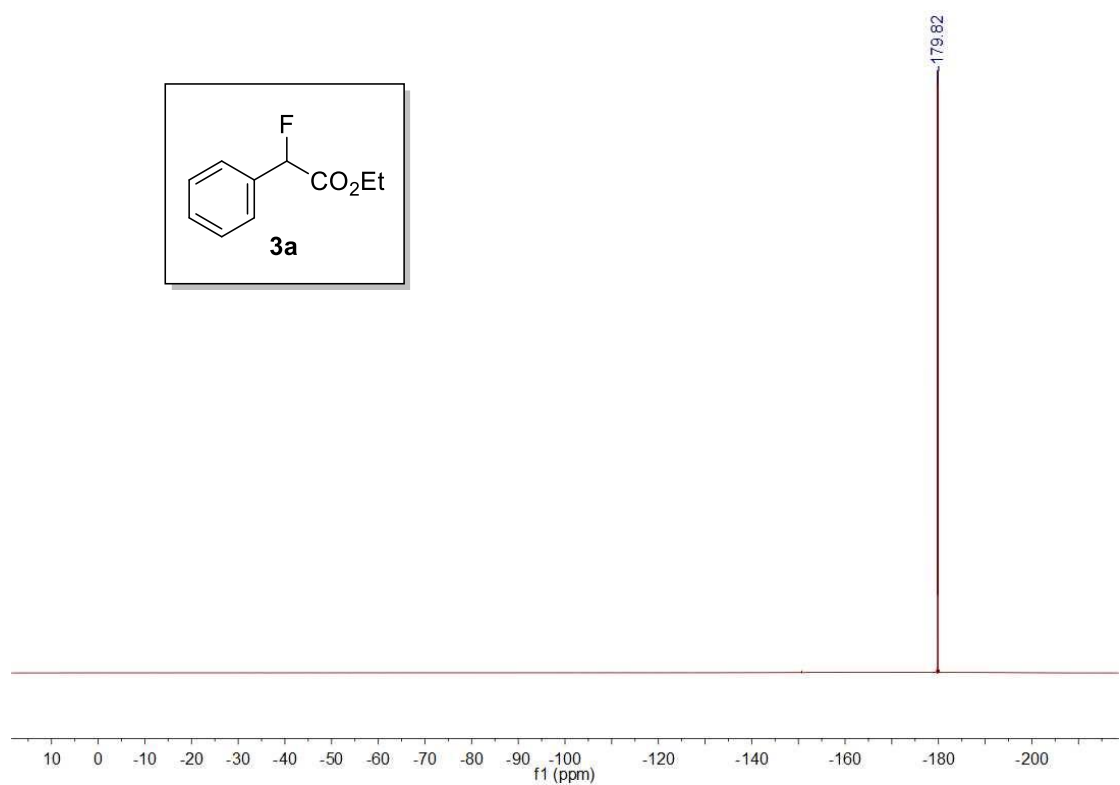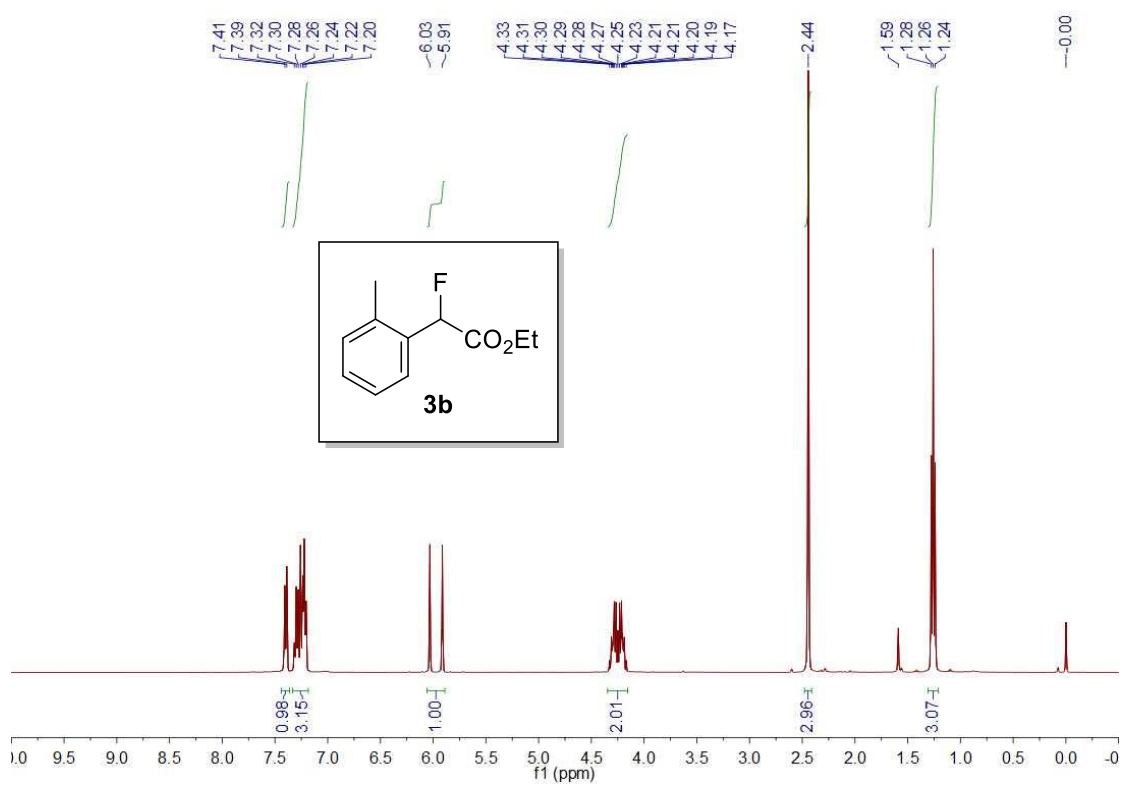

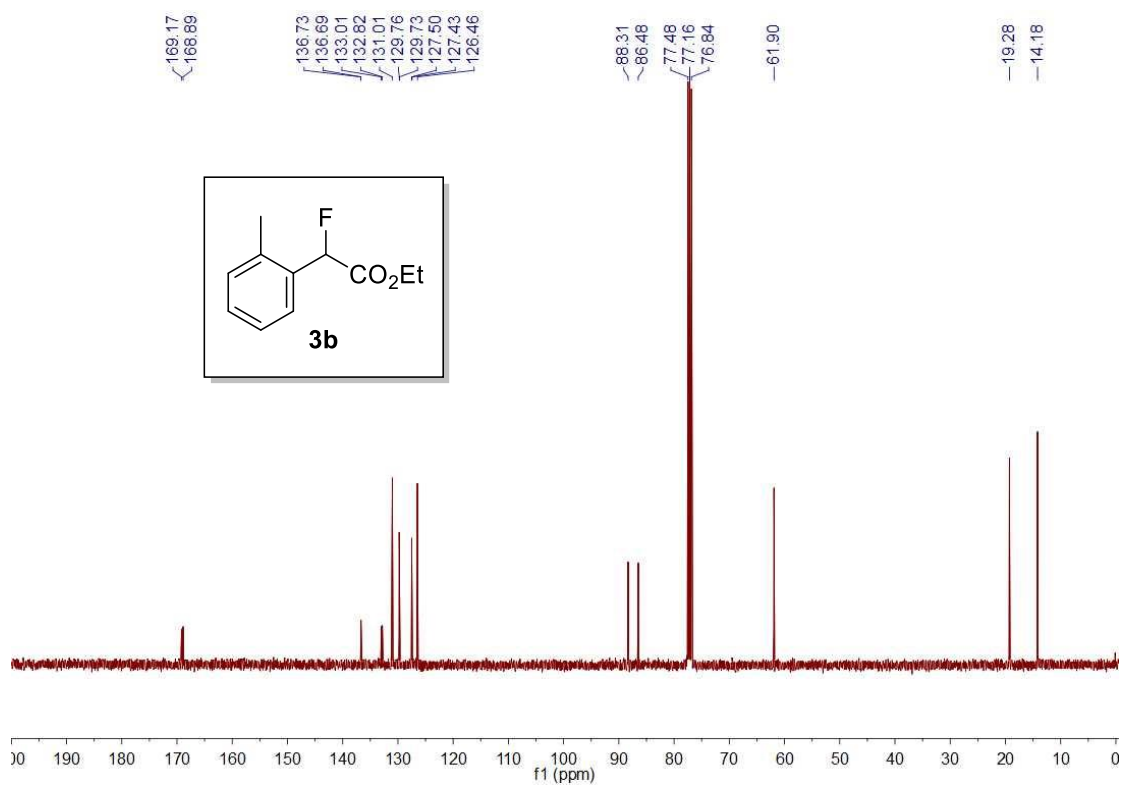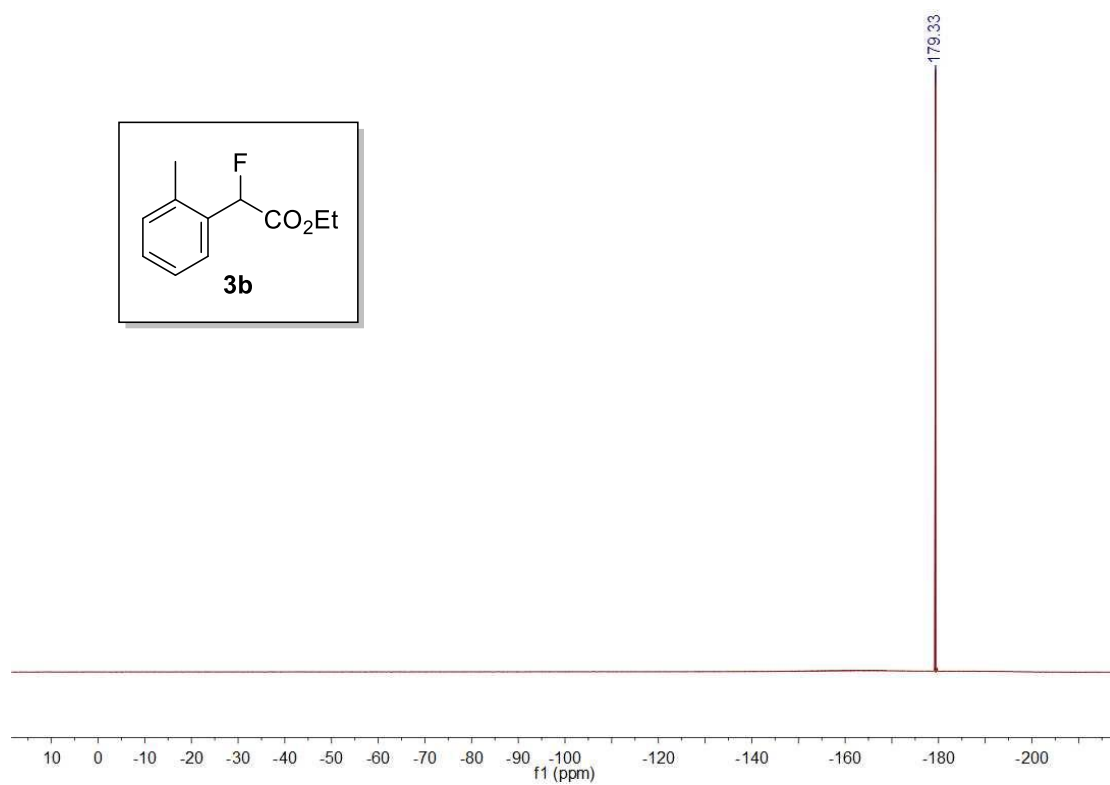

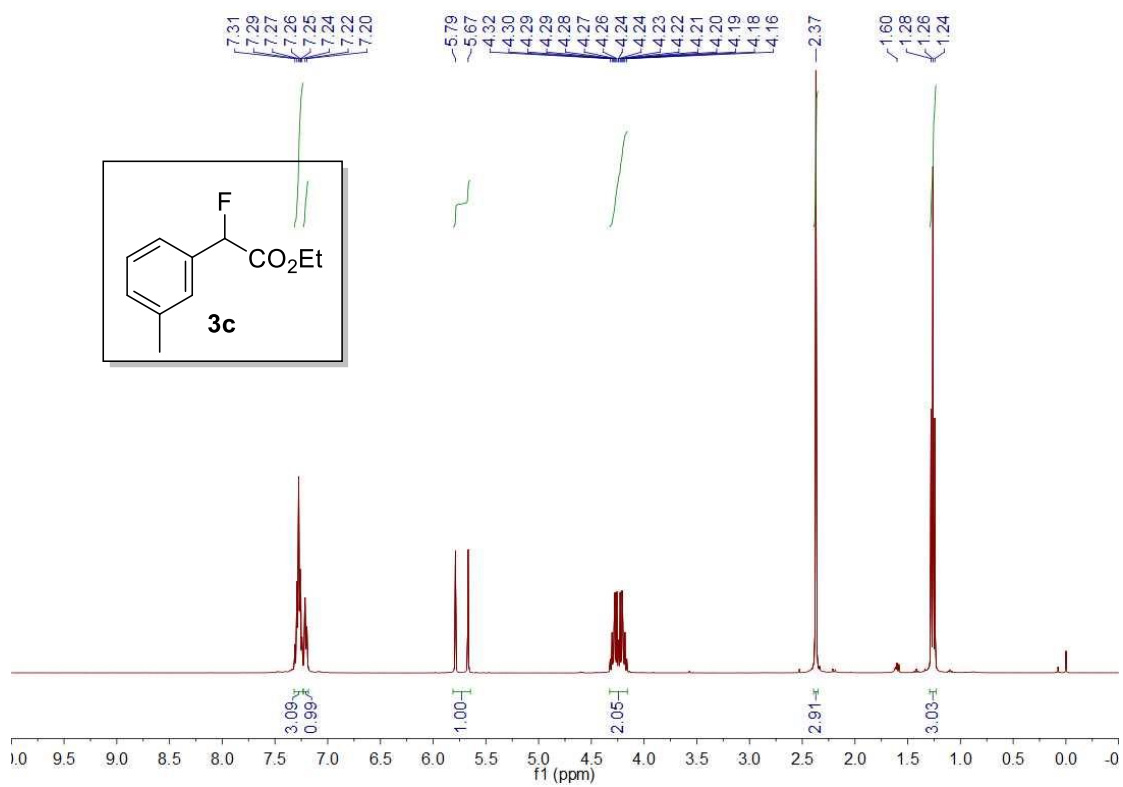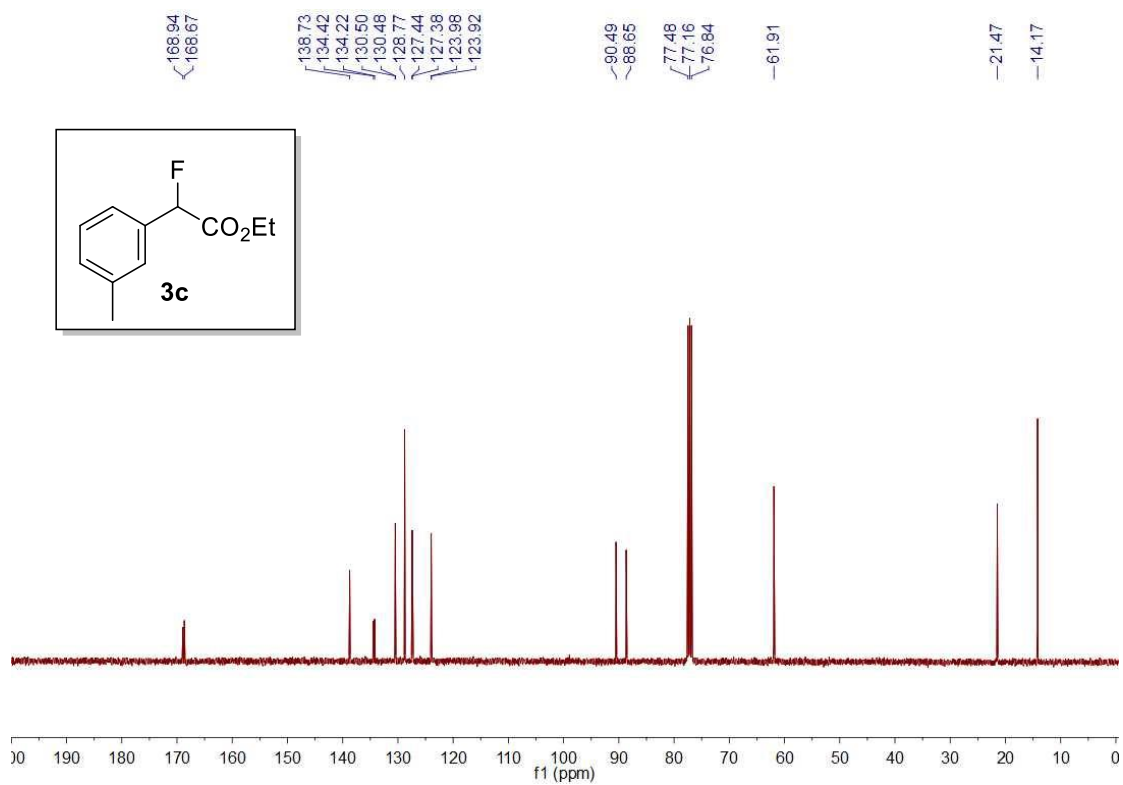

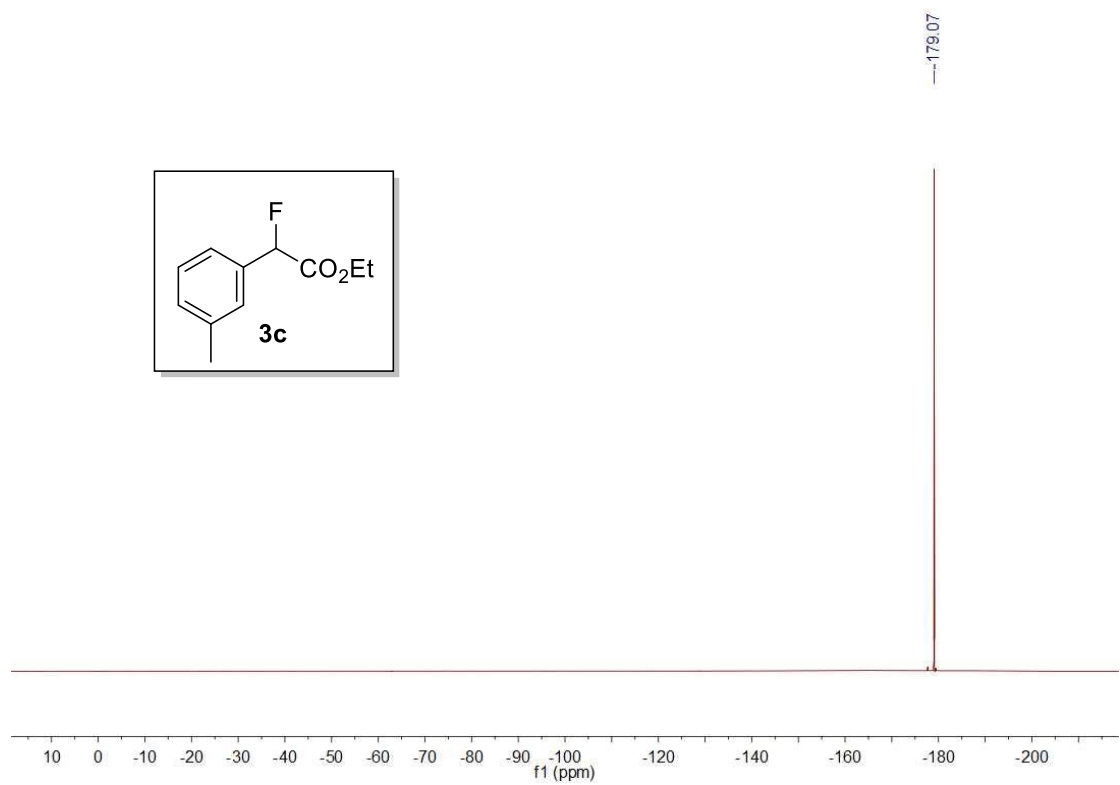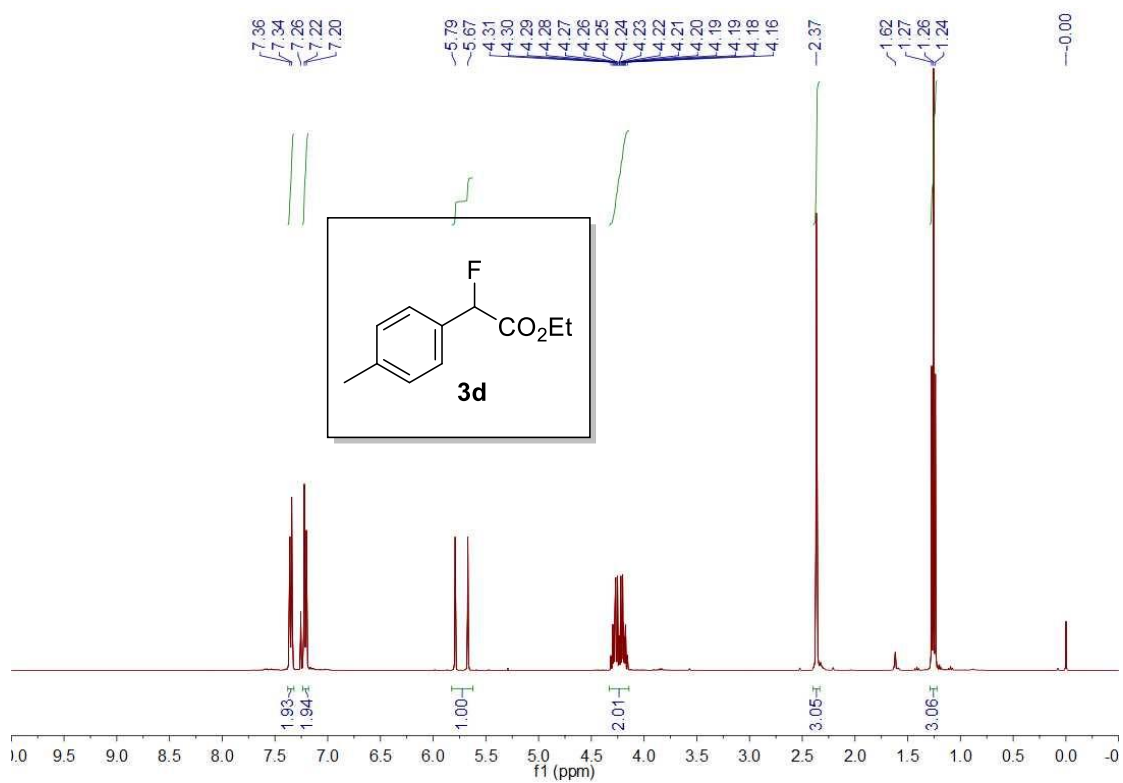

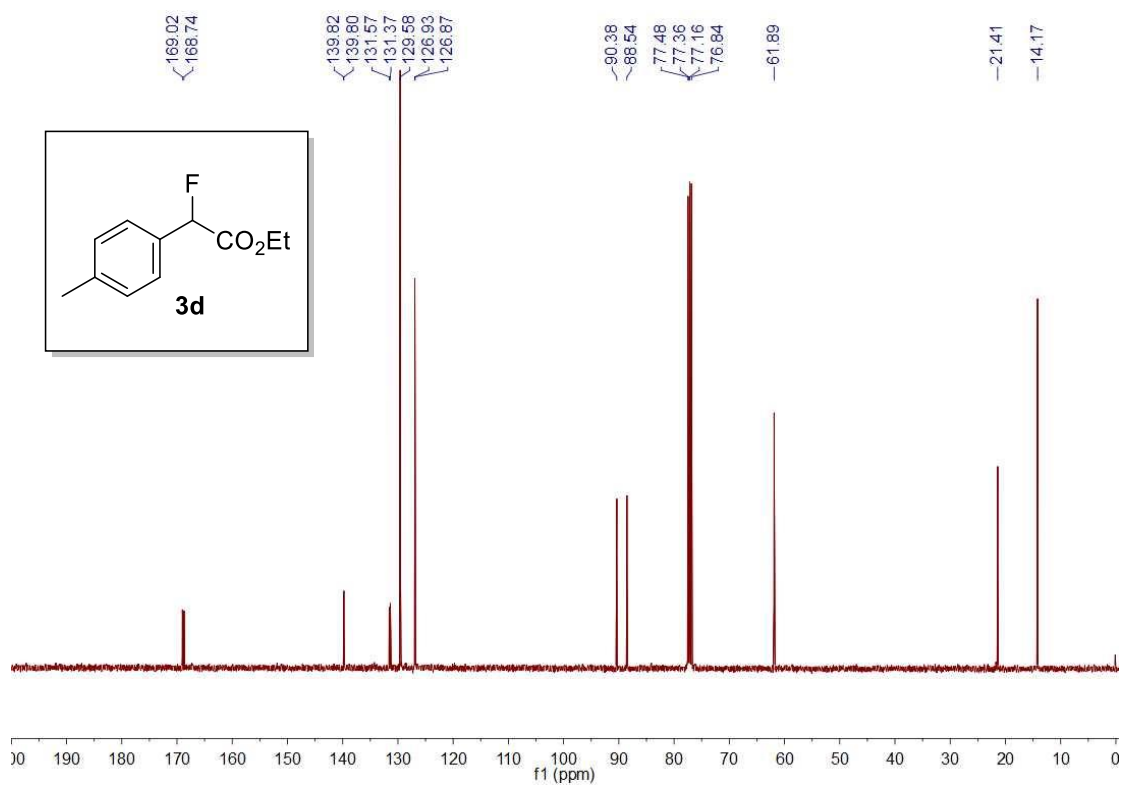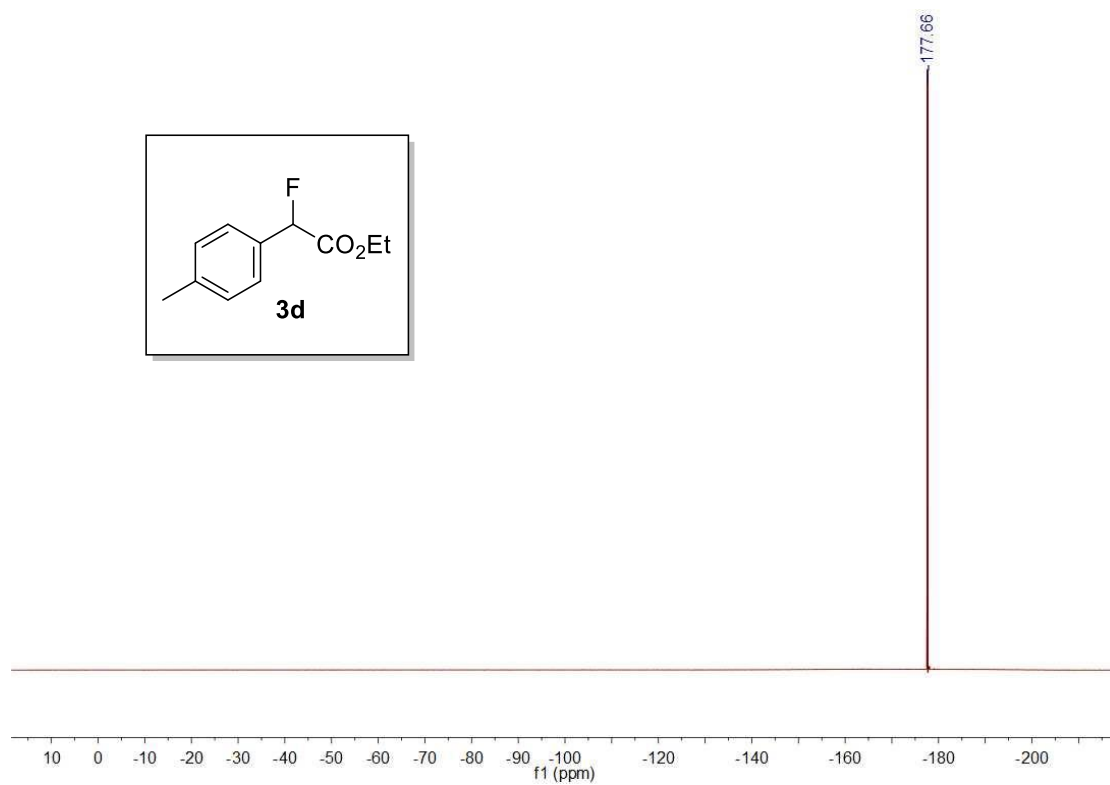

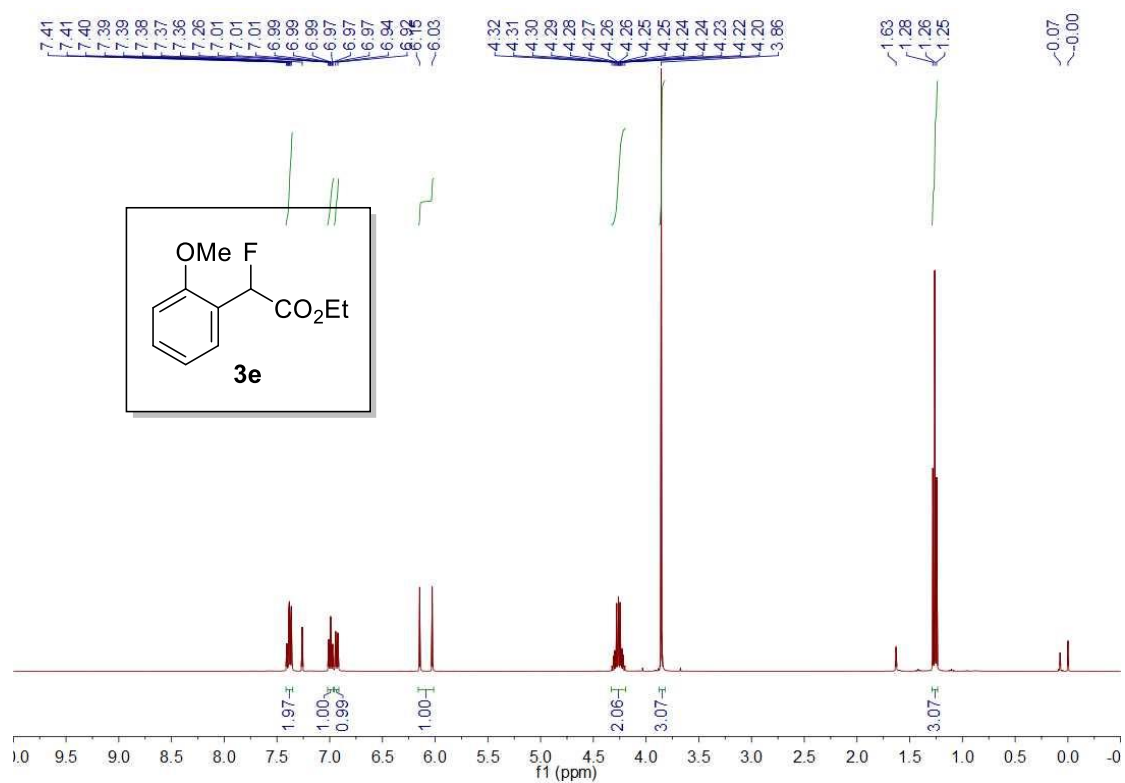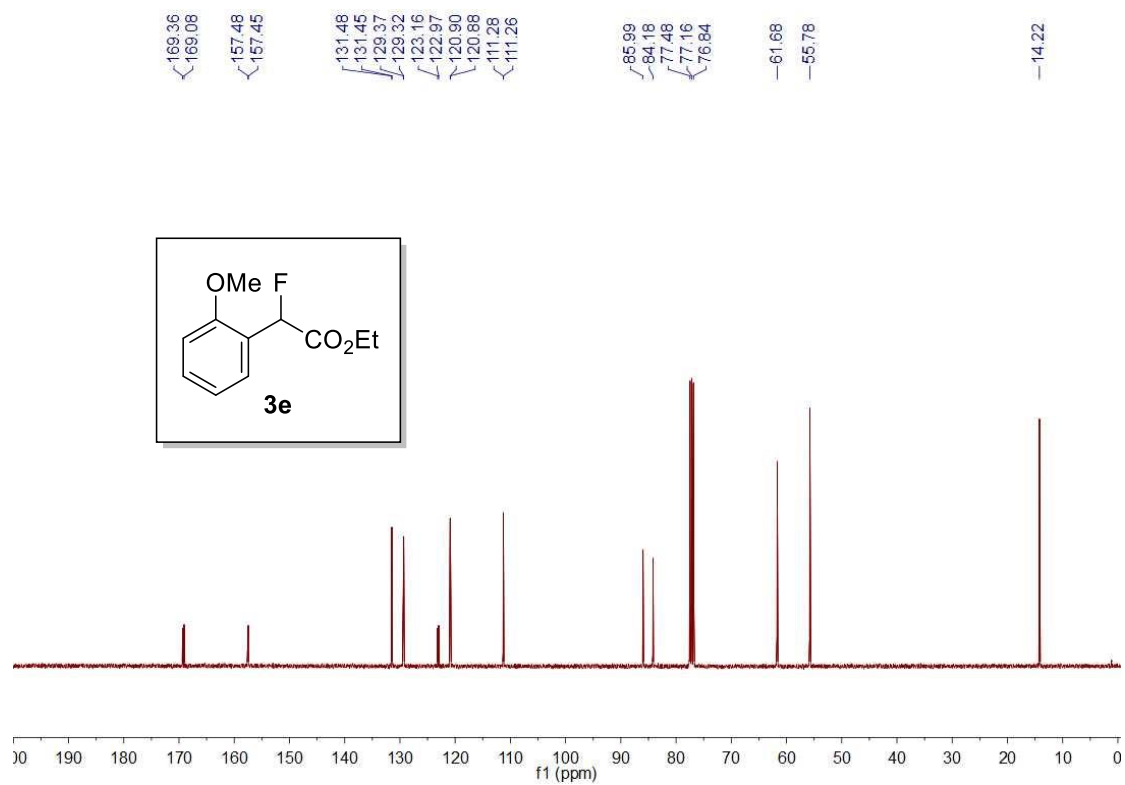



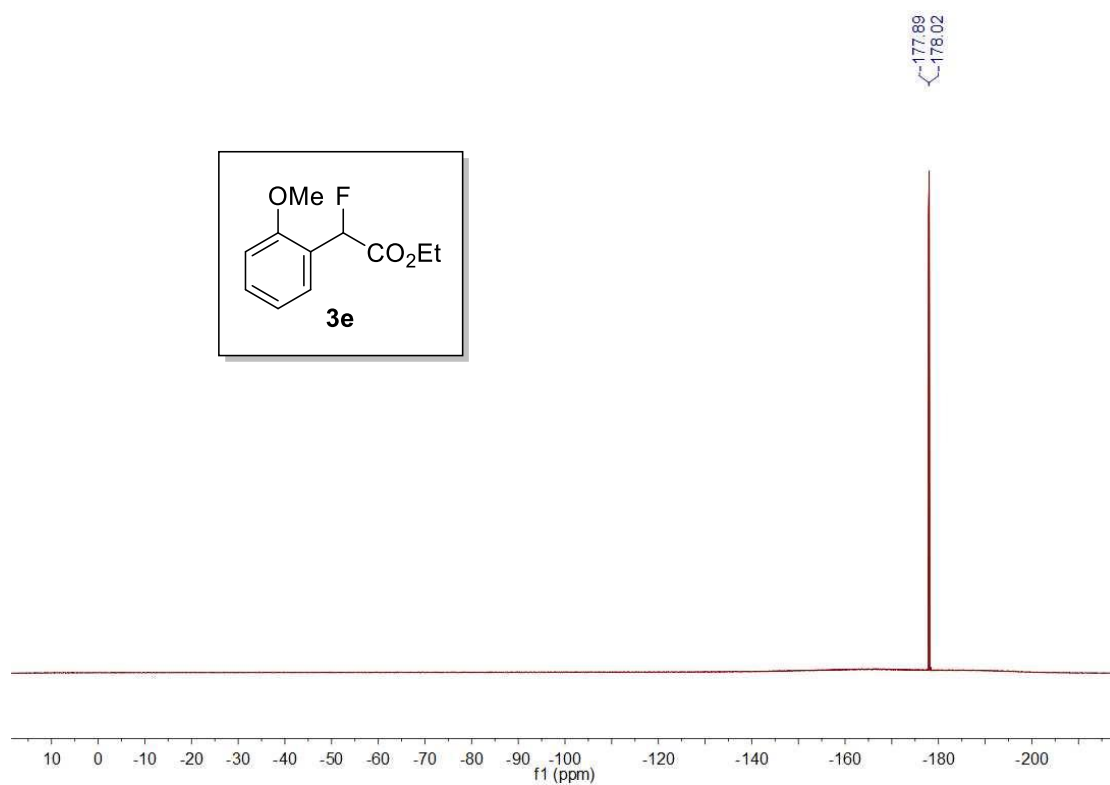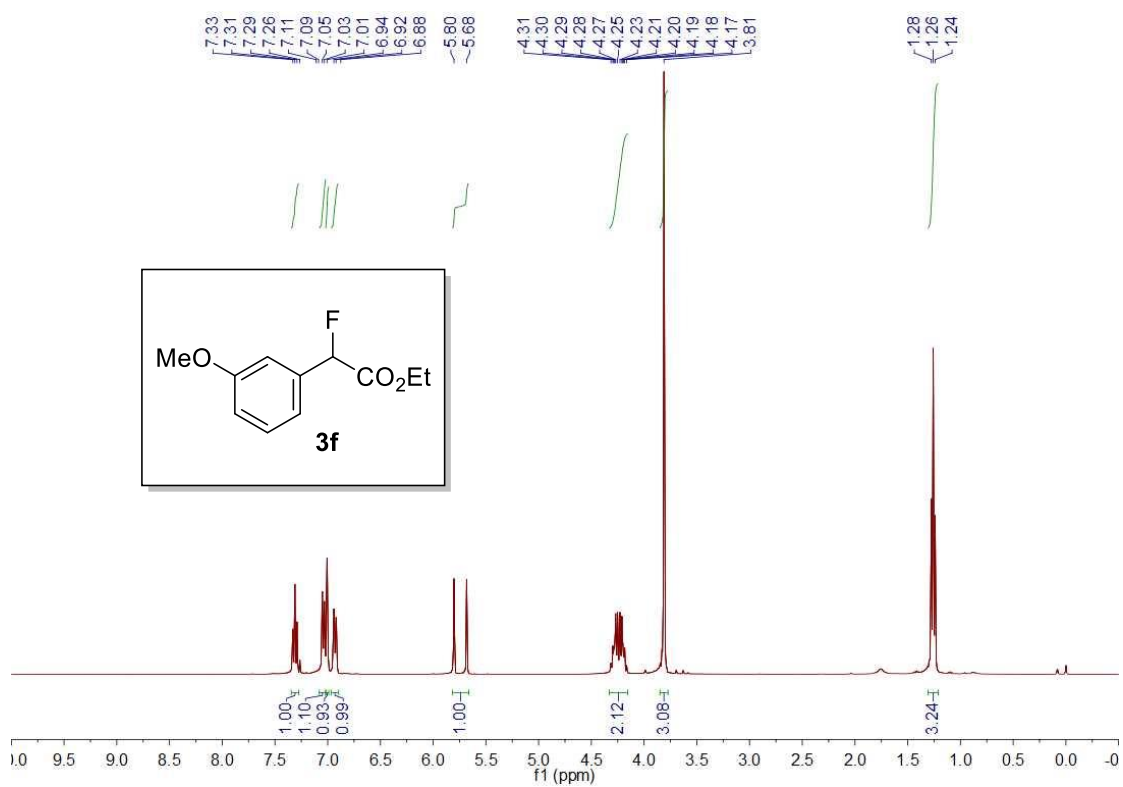

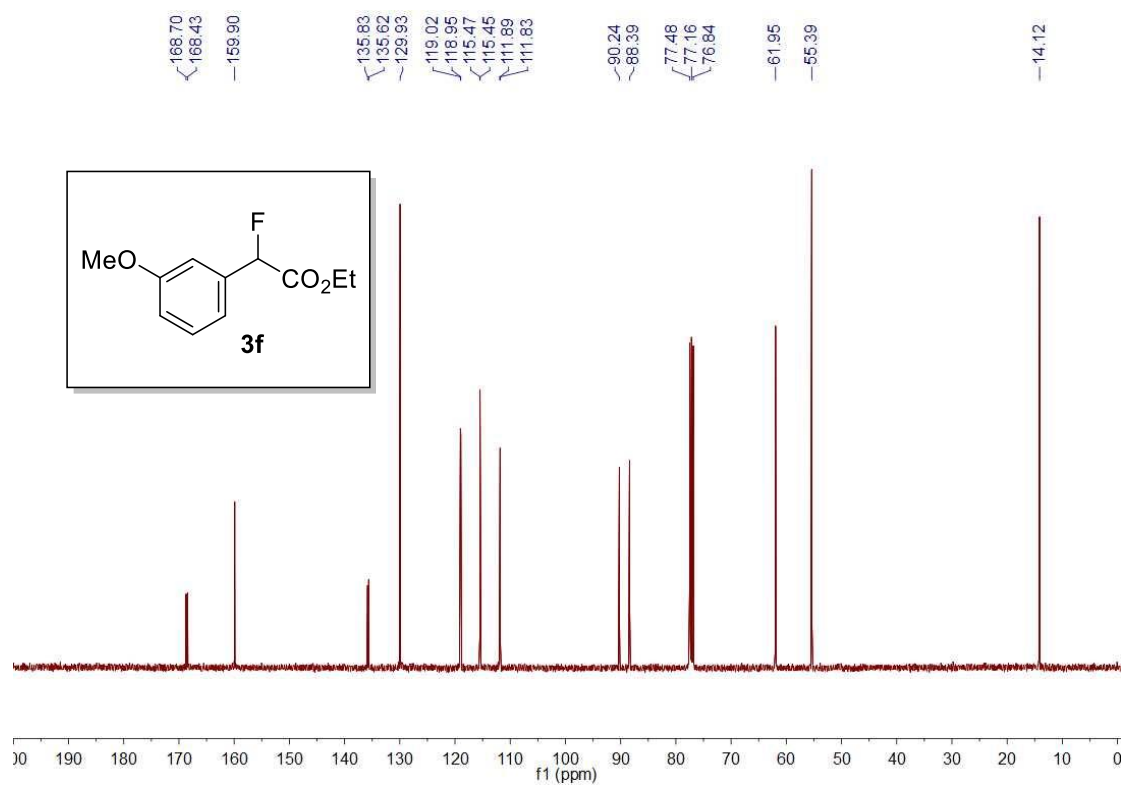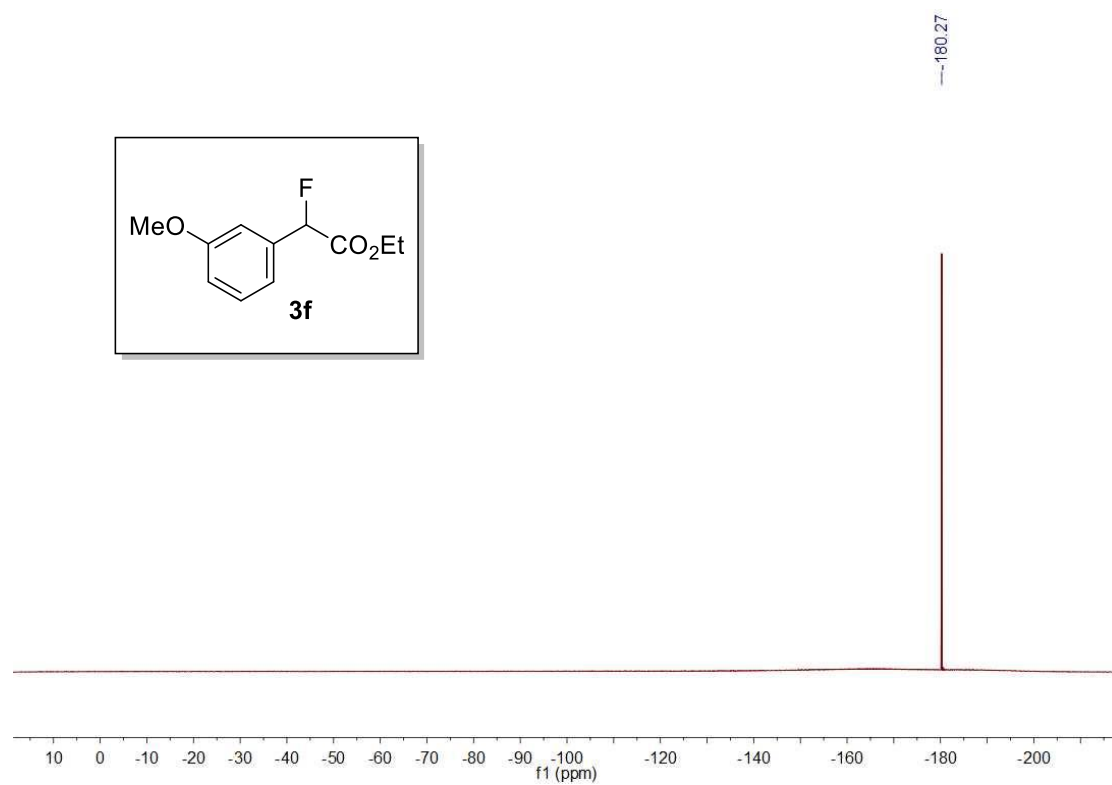

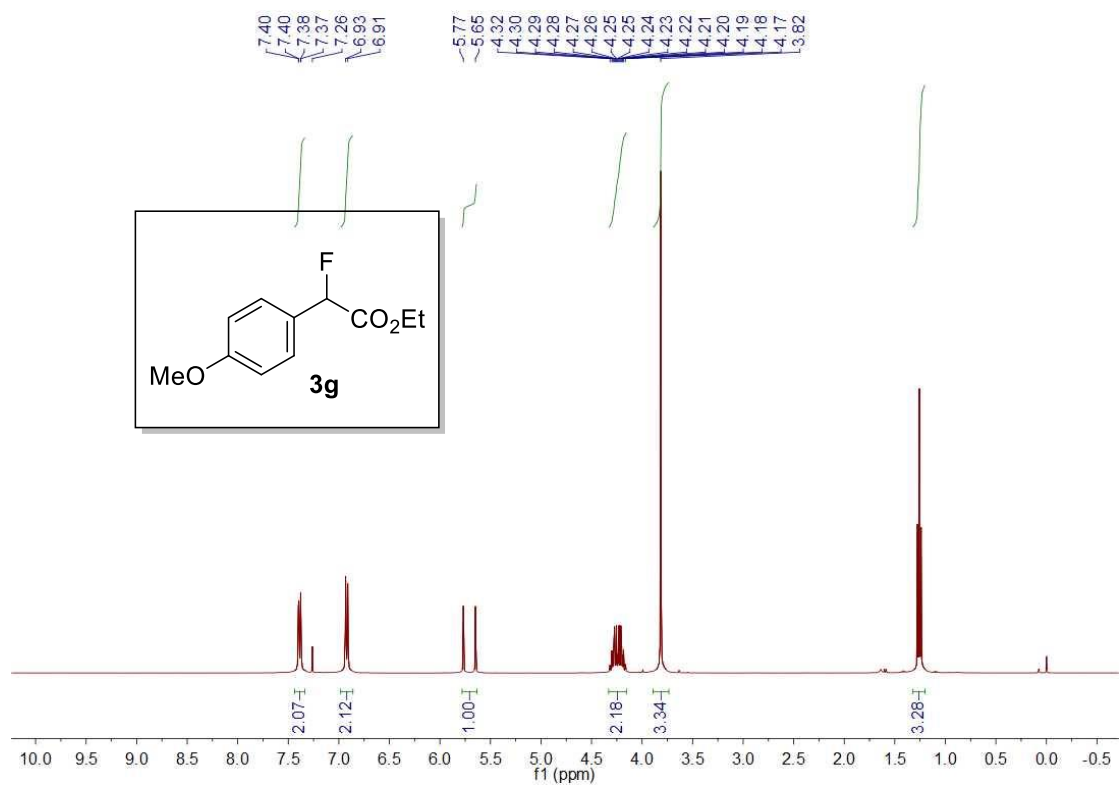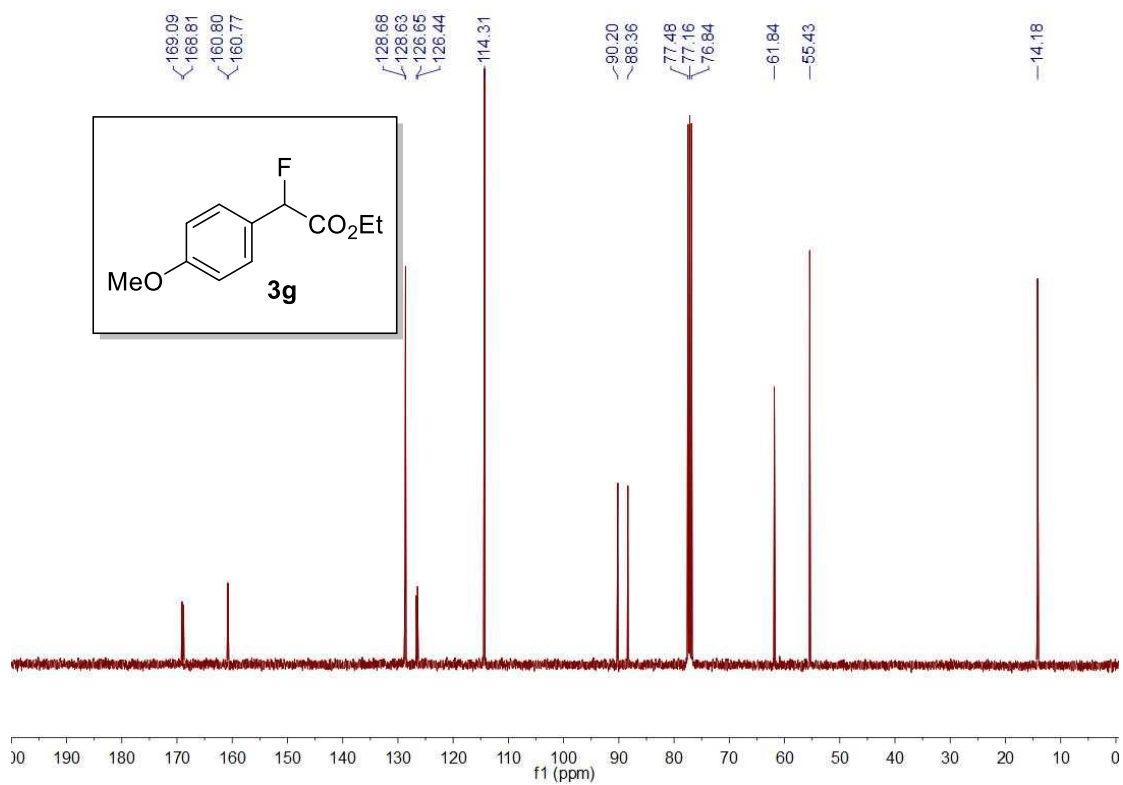

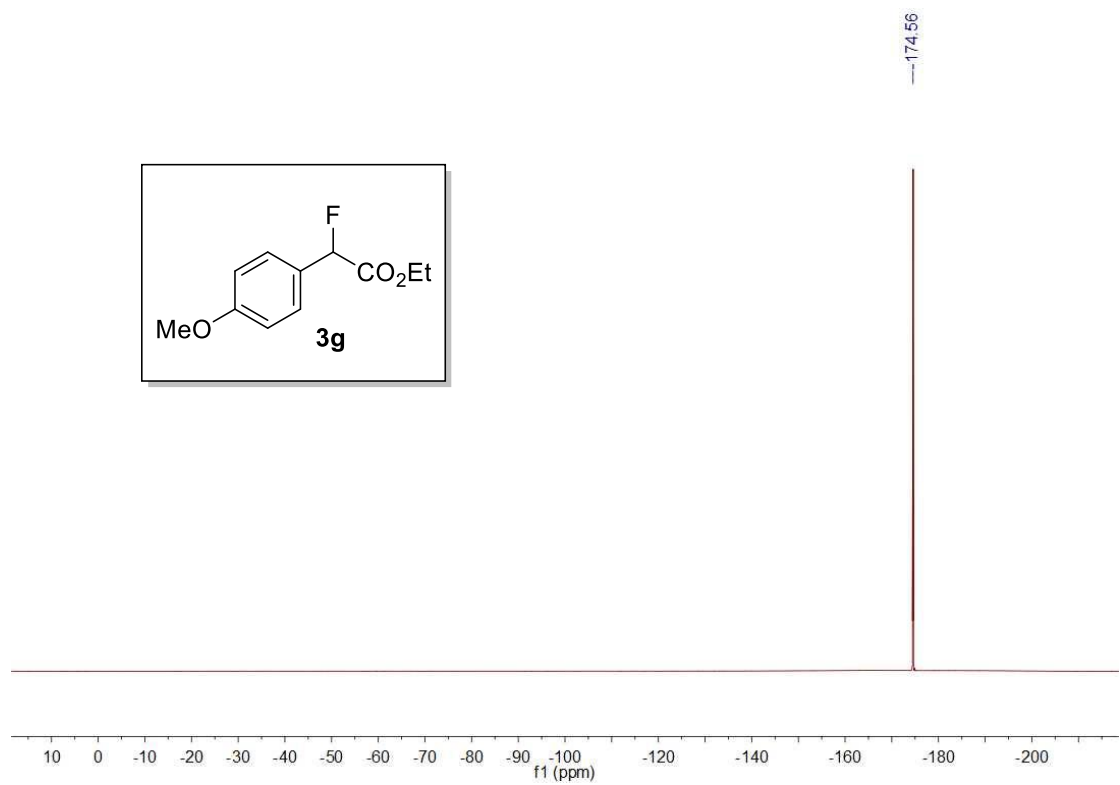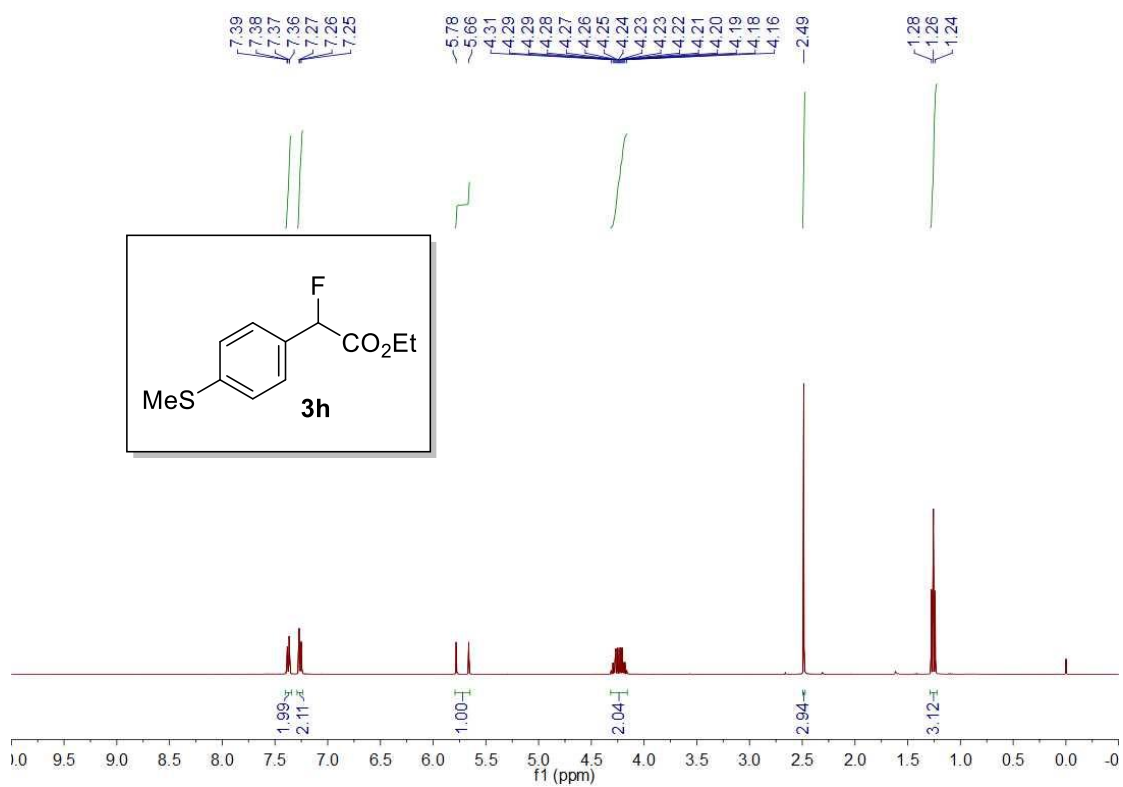

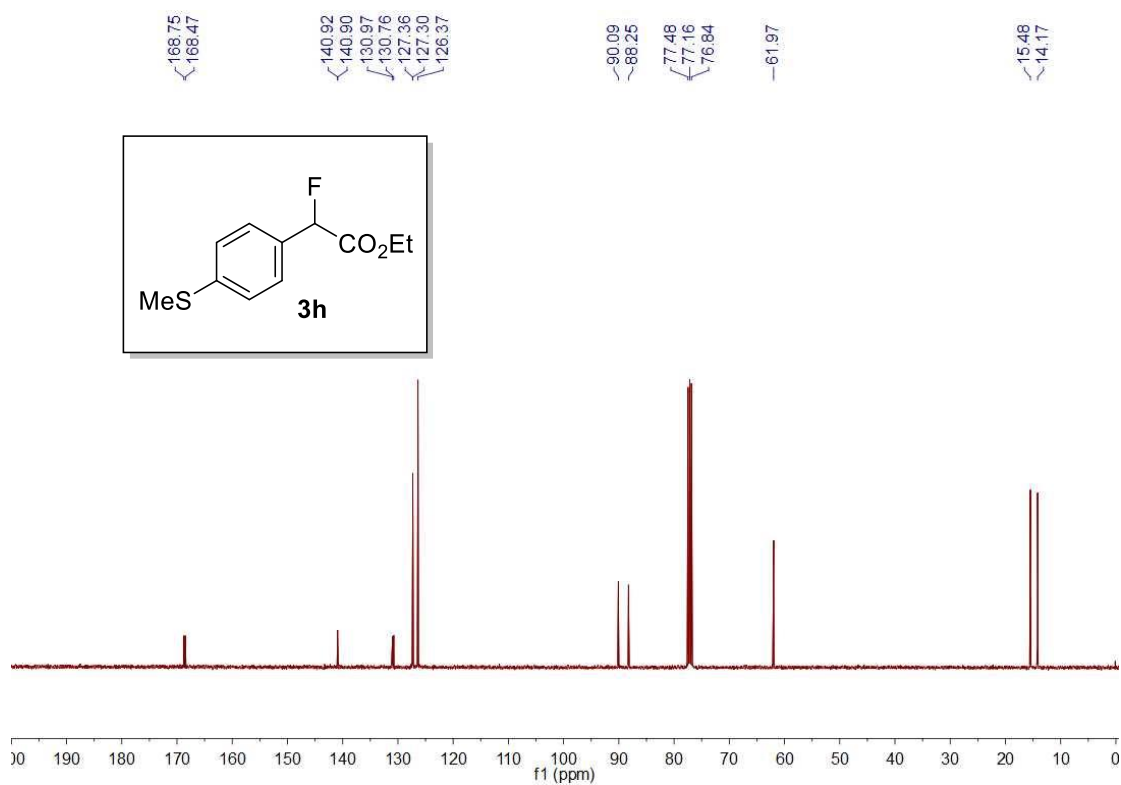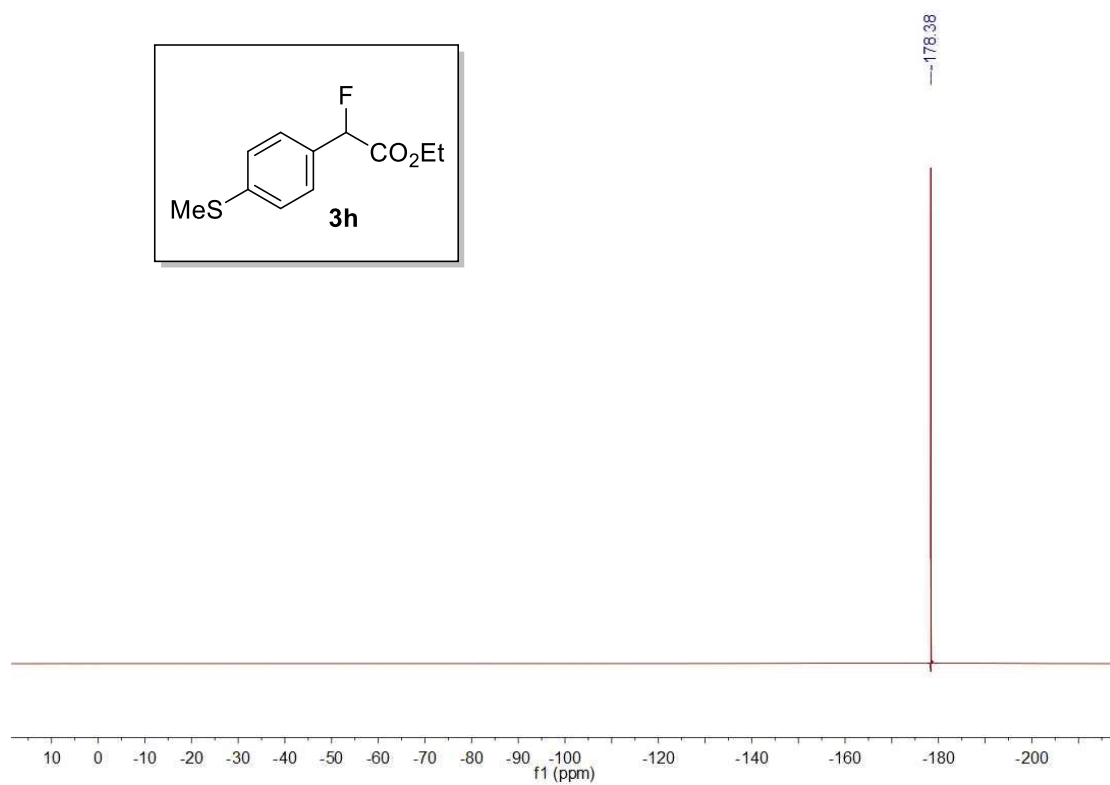

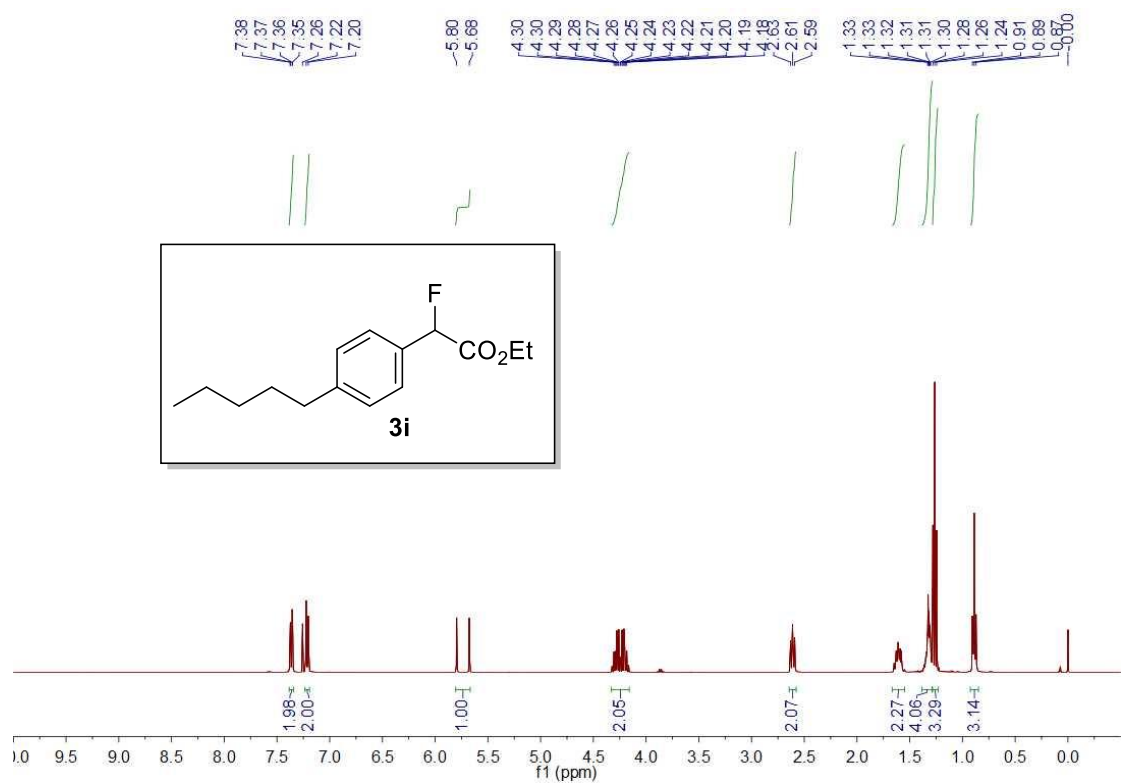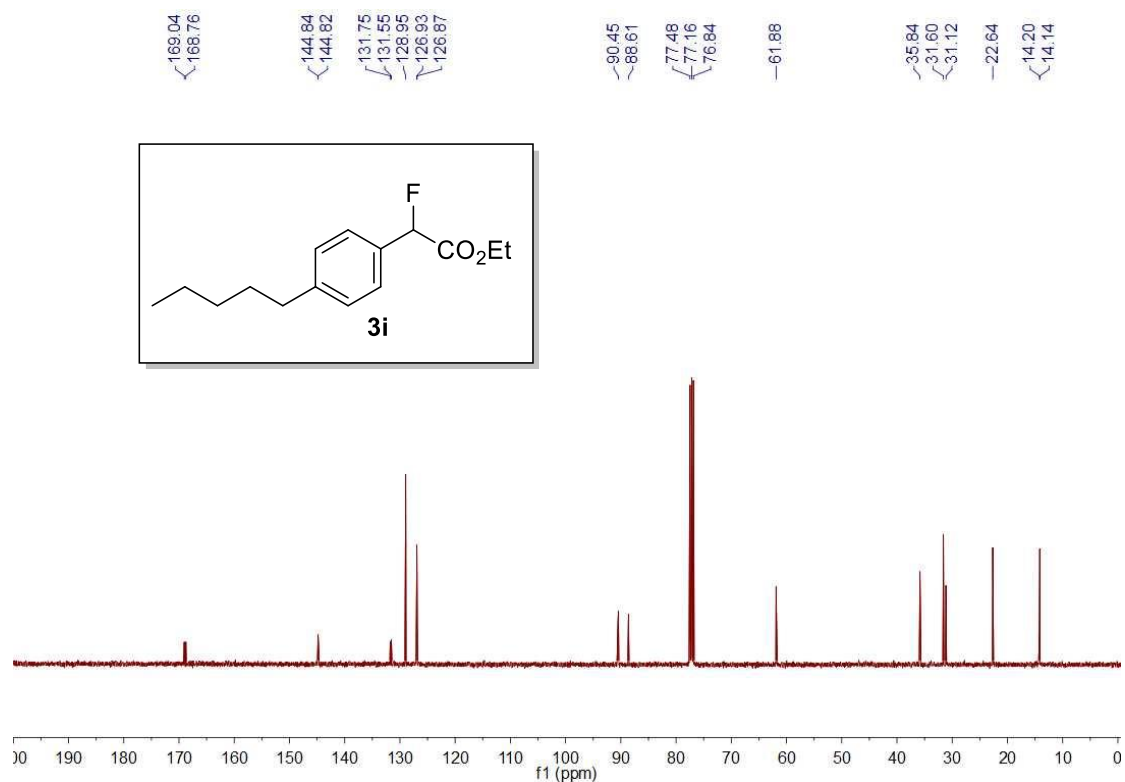

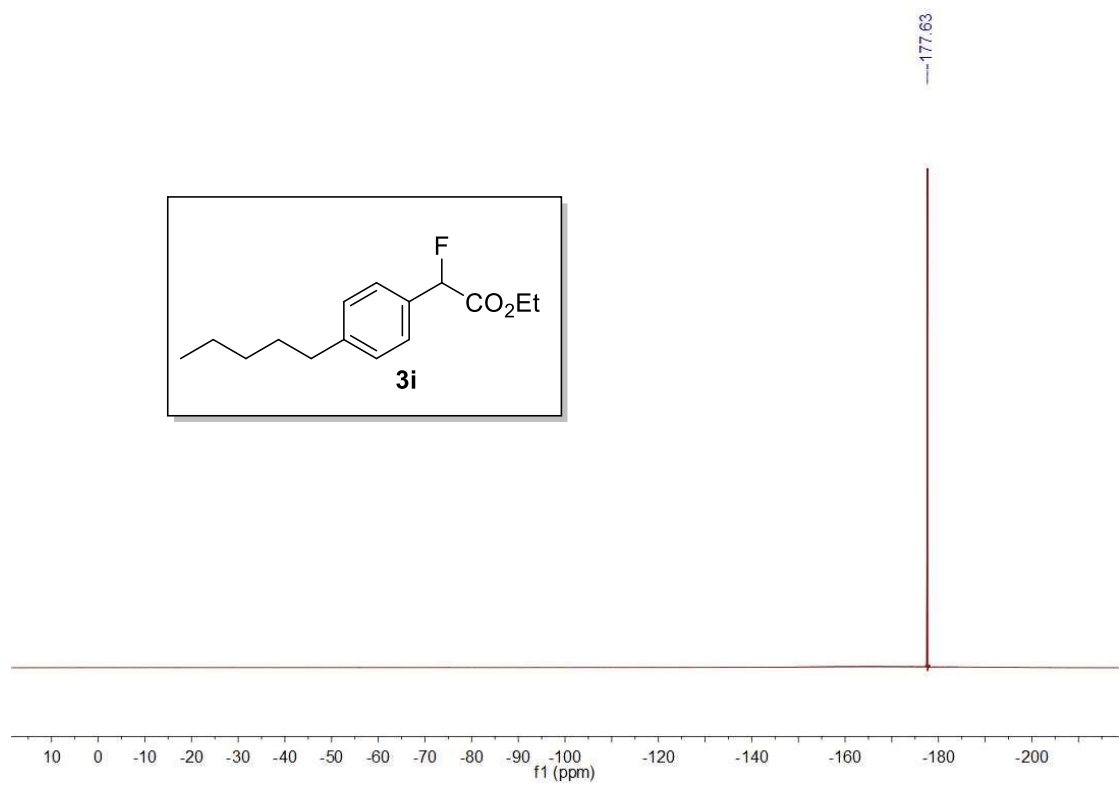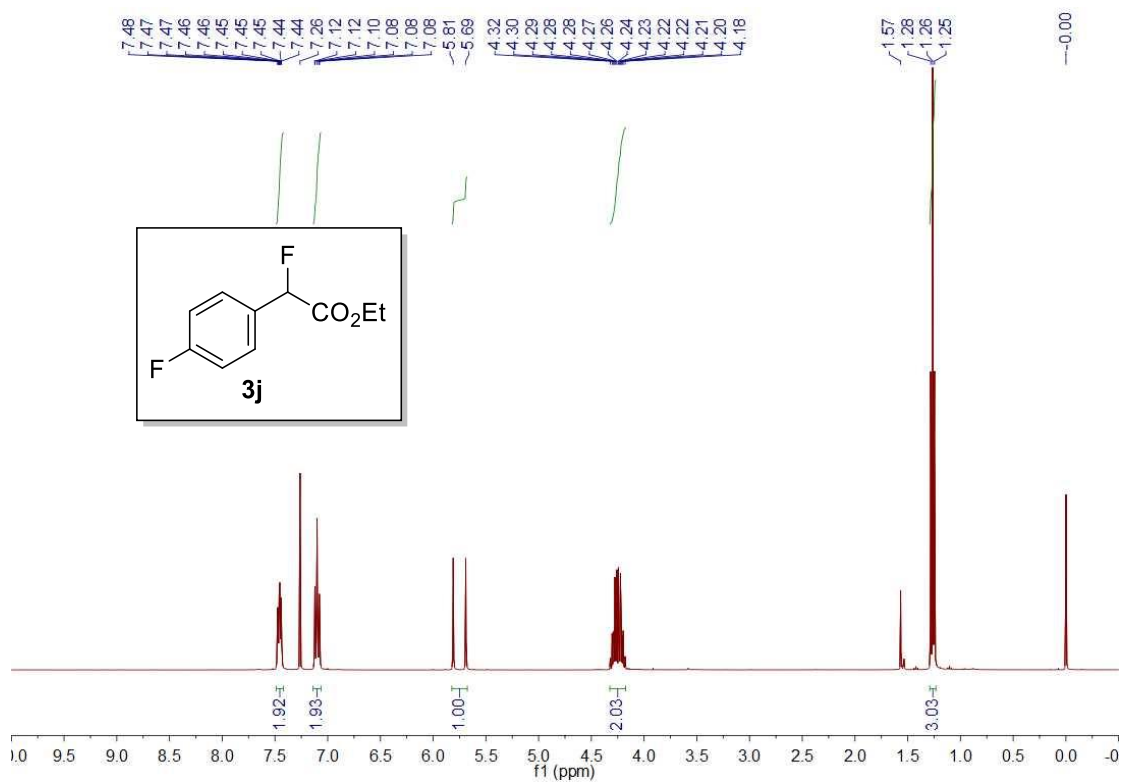

v

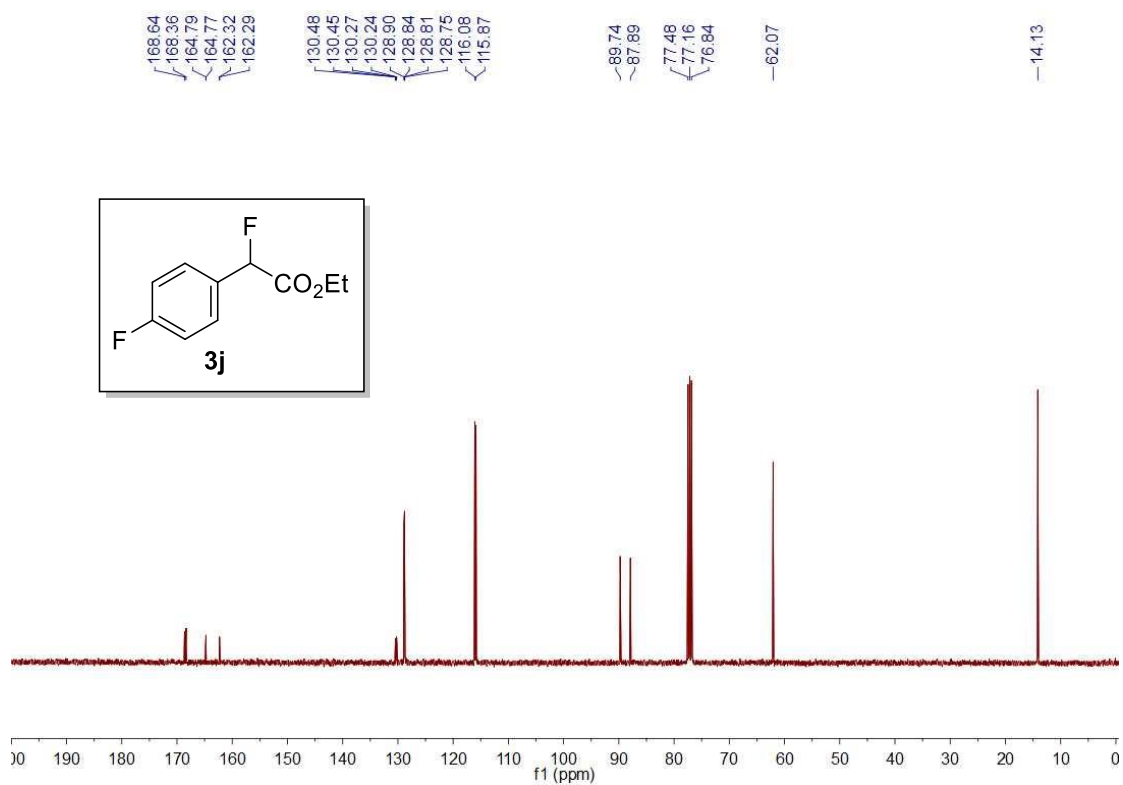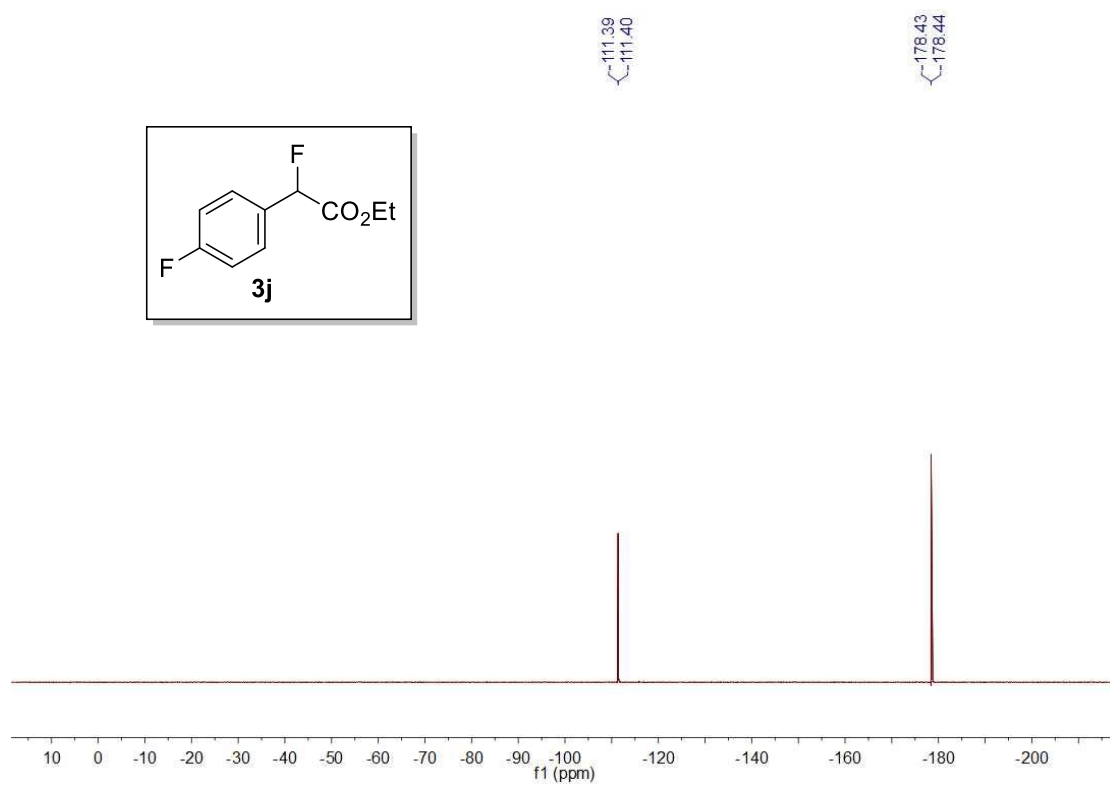



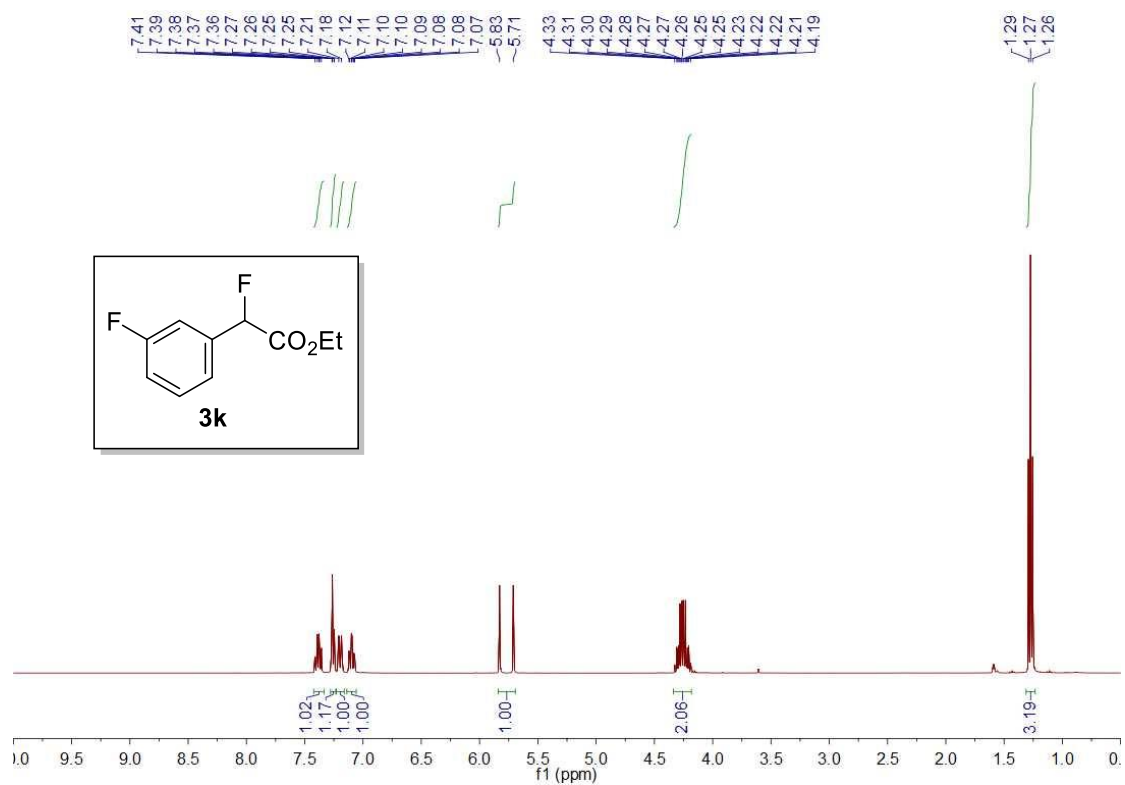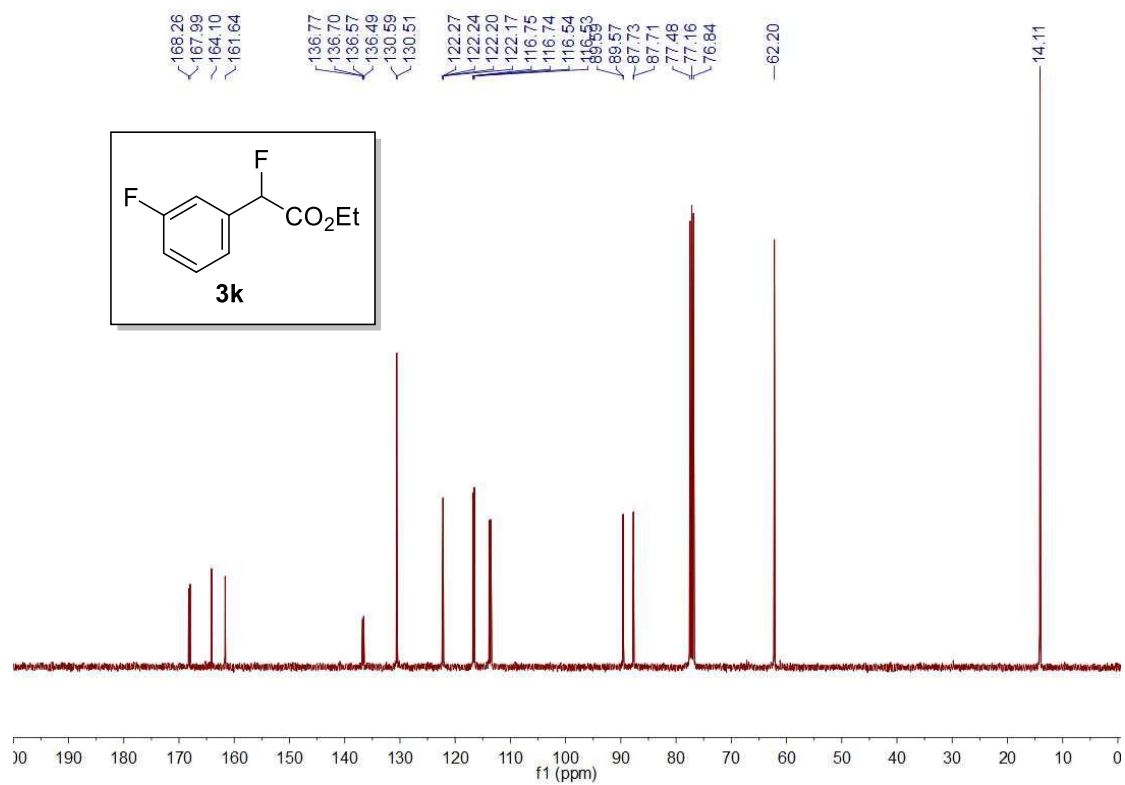

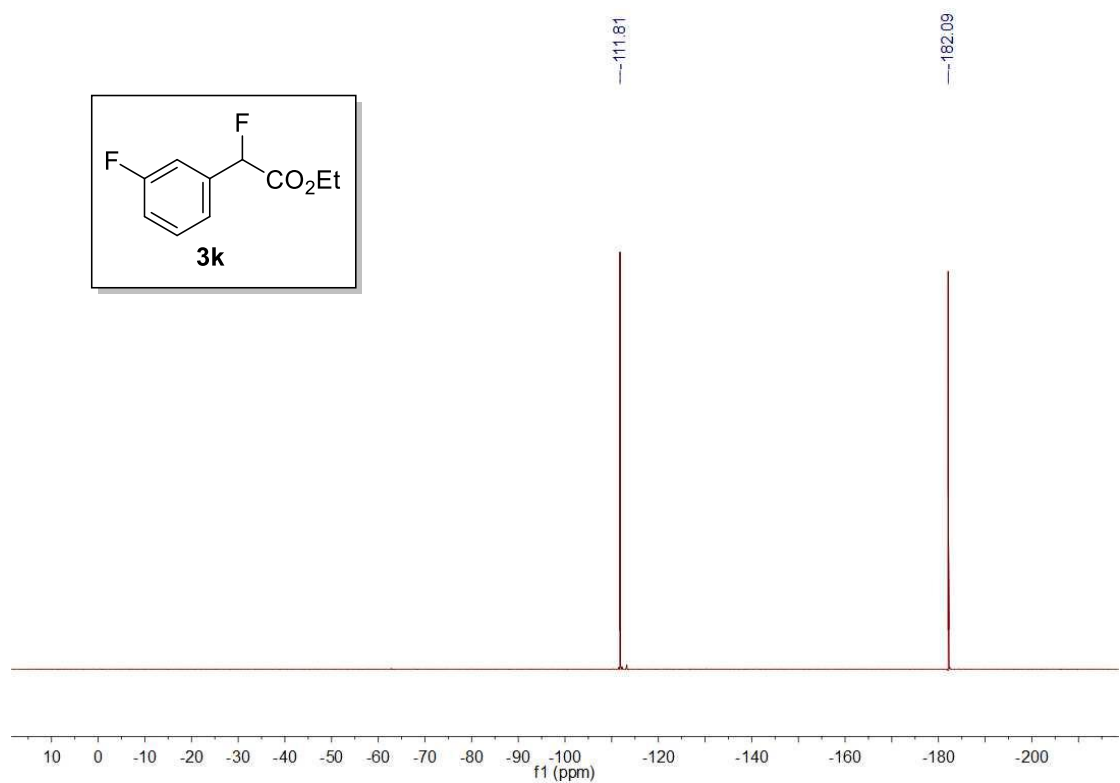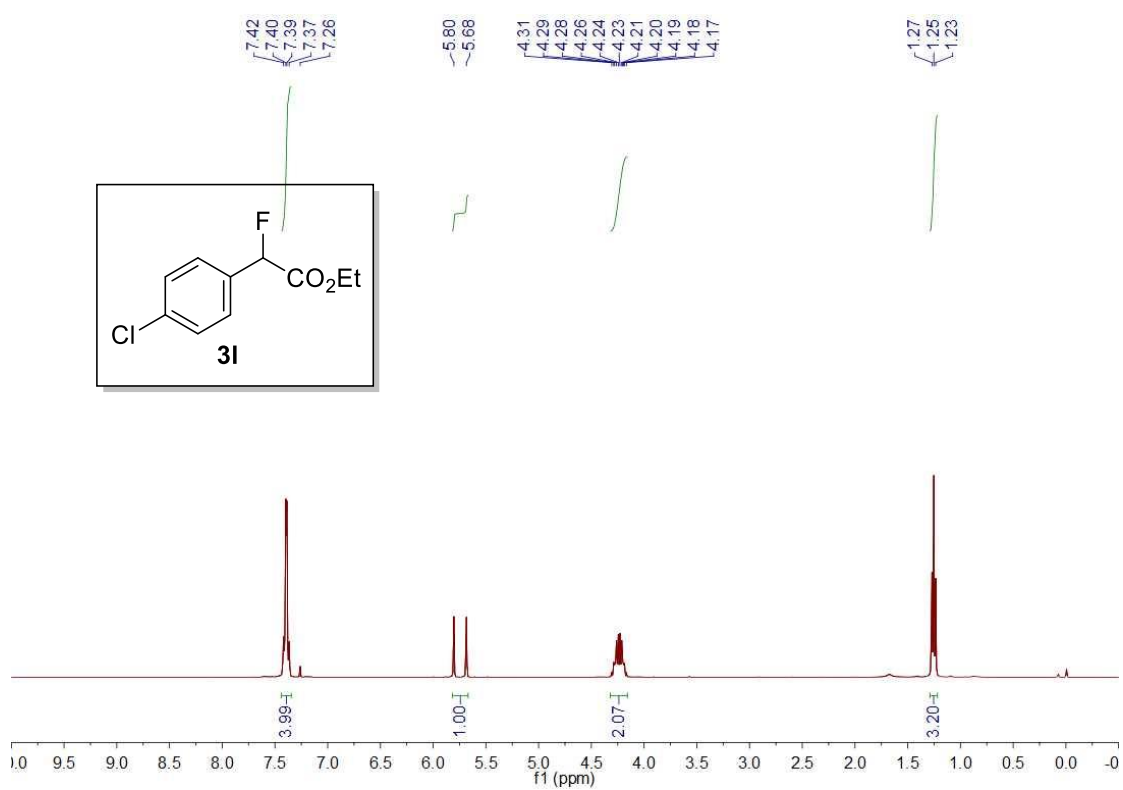

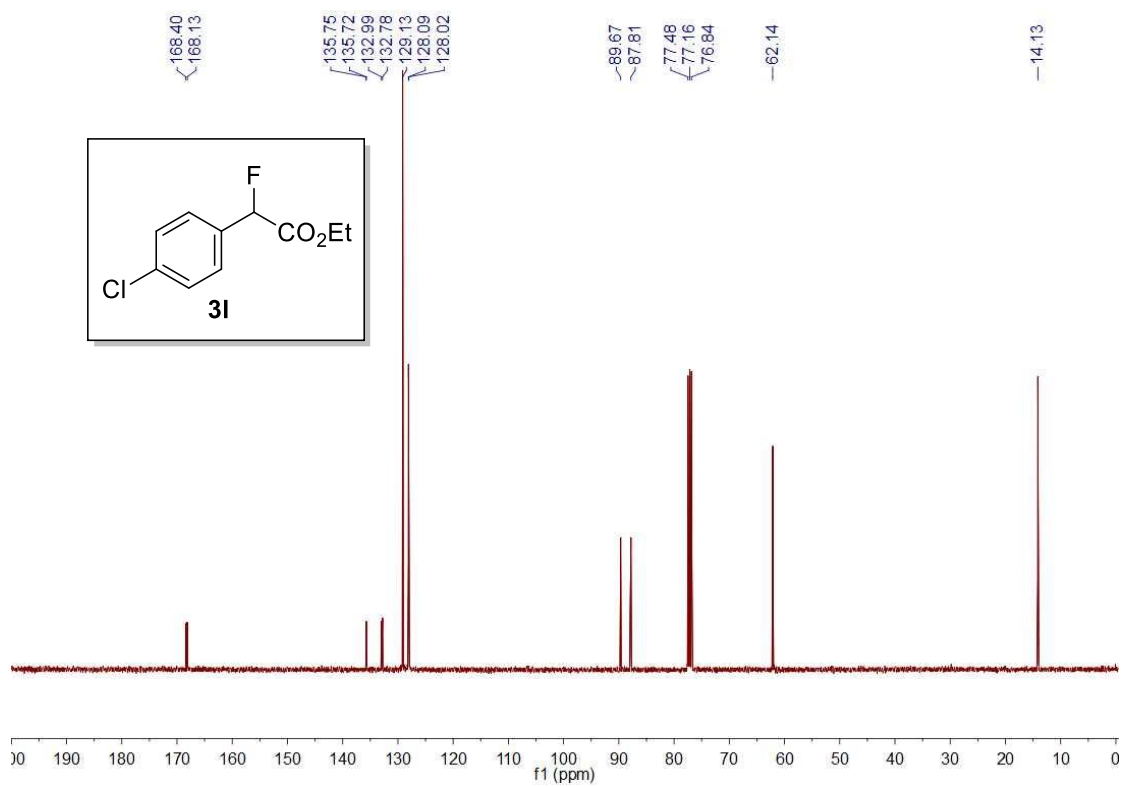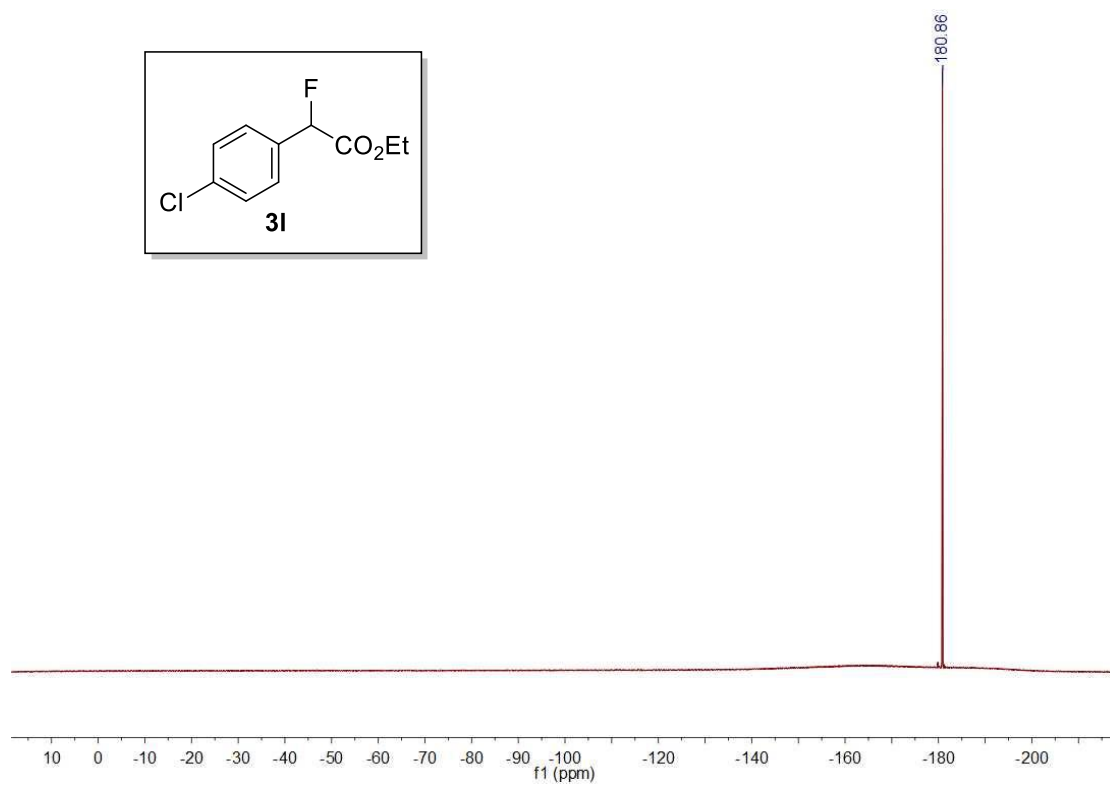

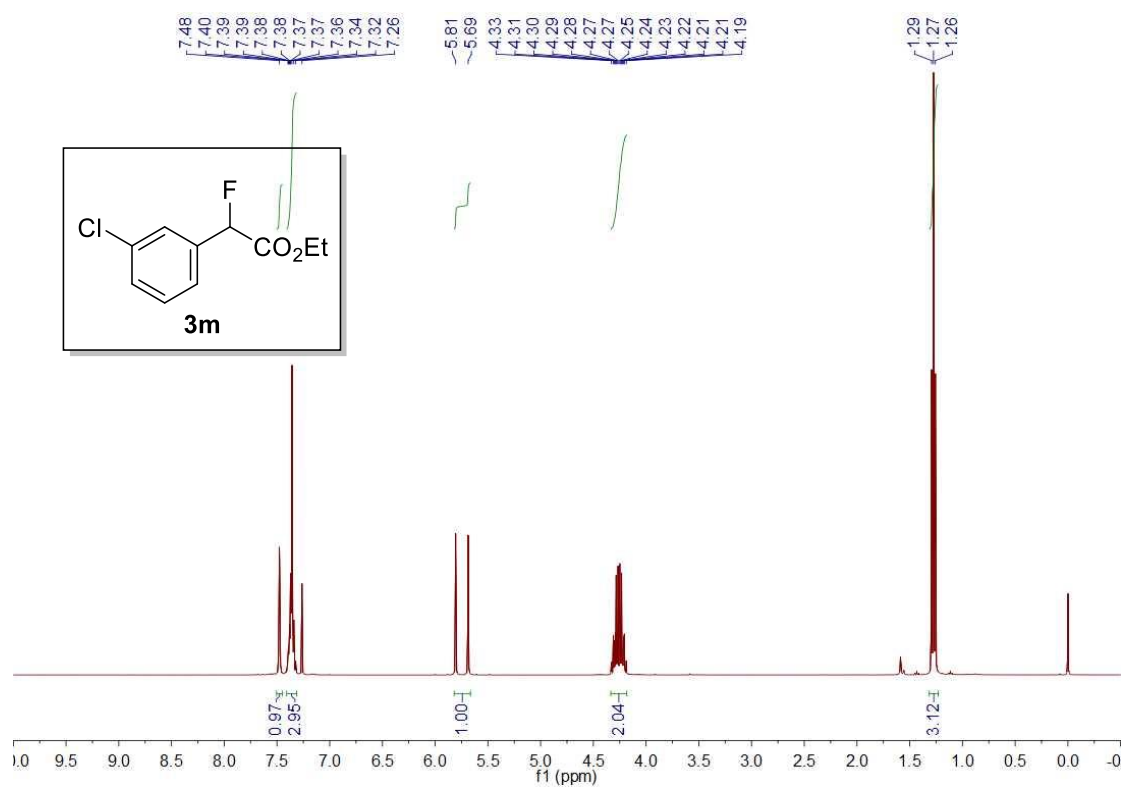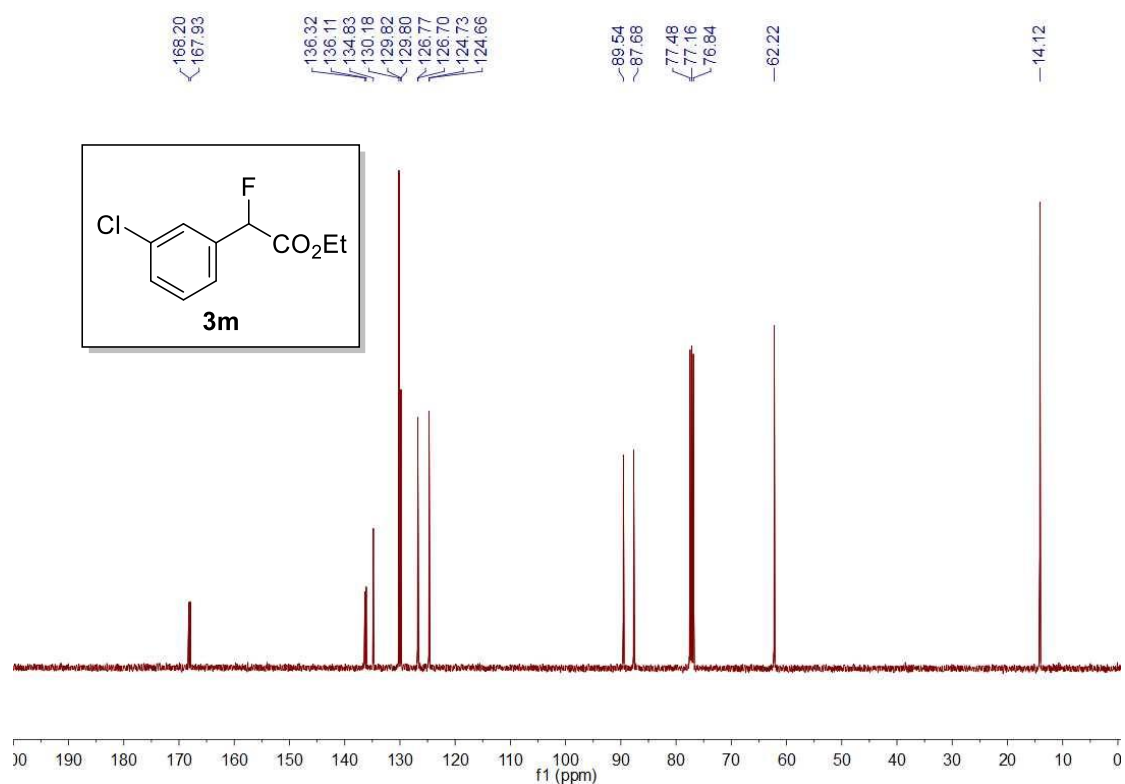

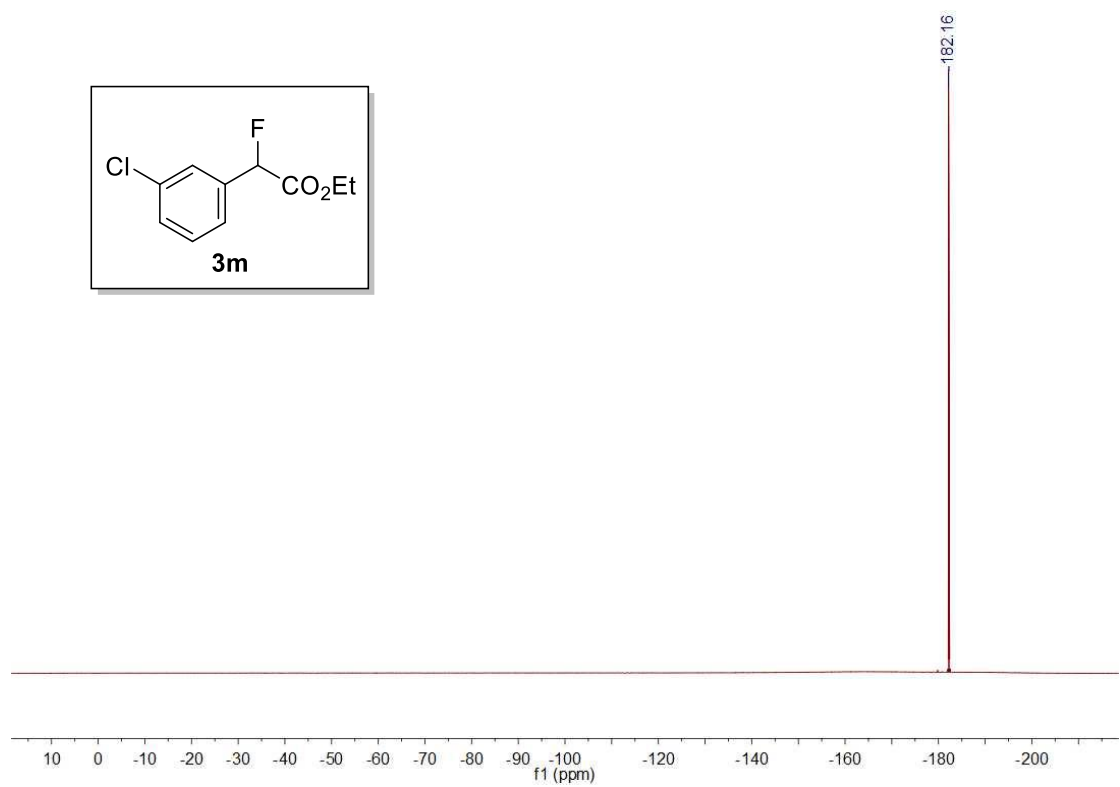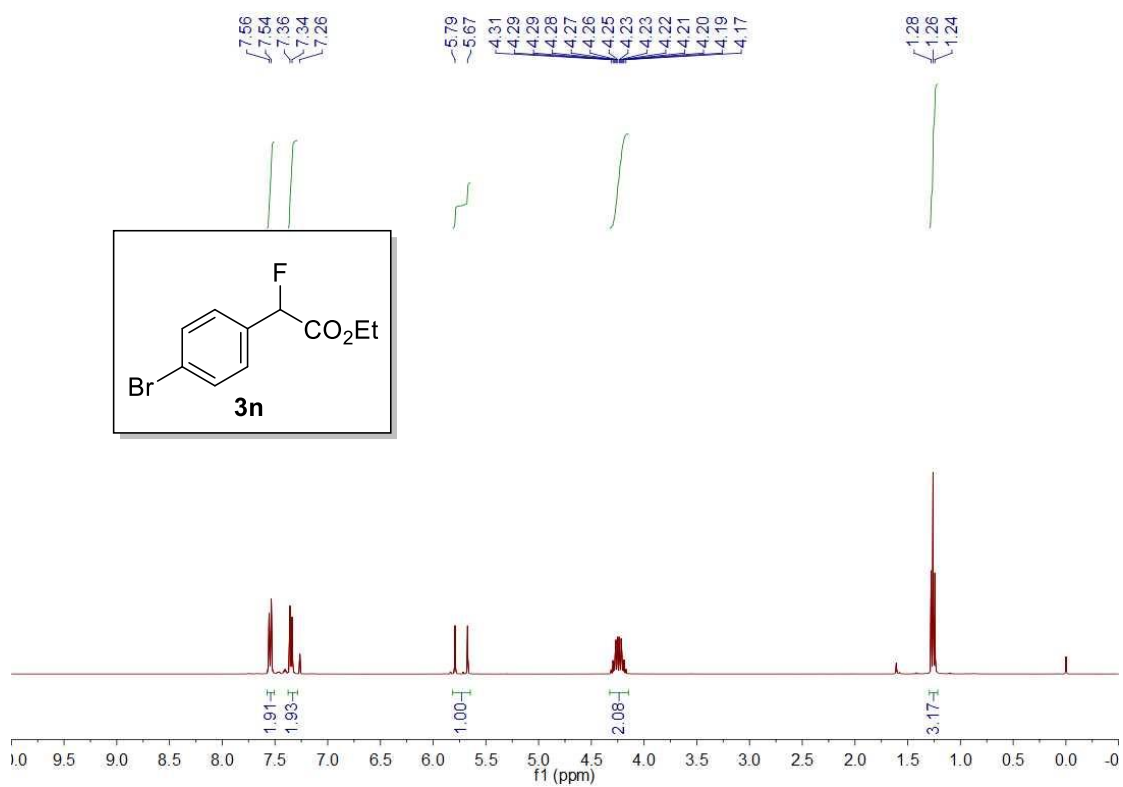

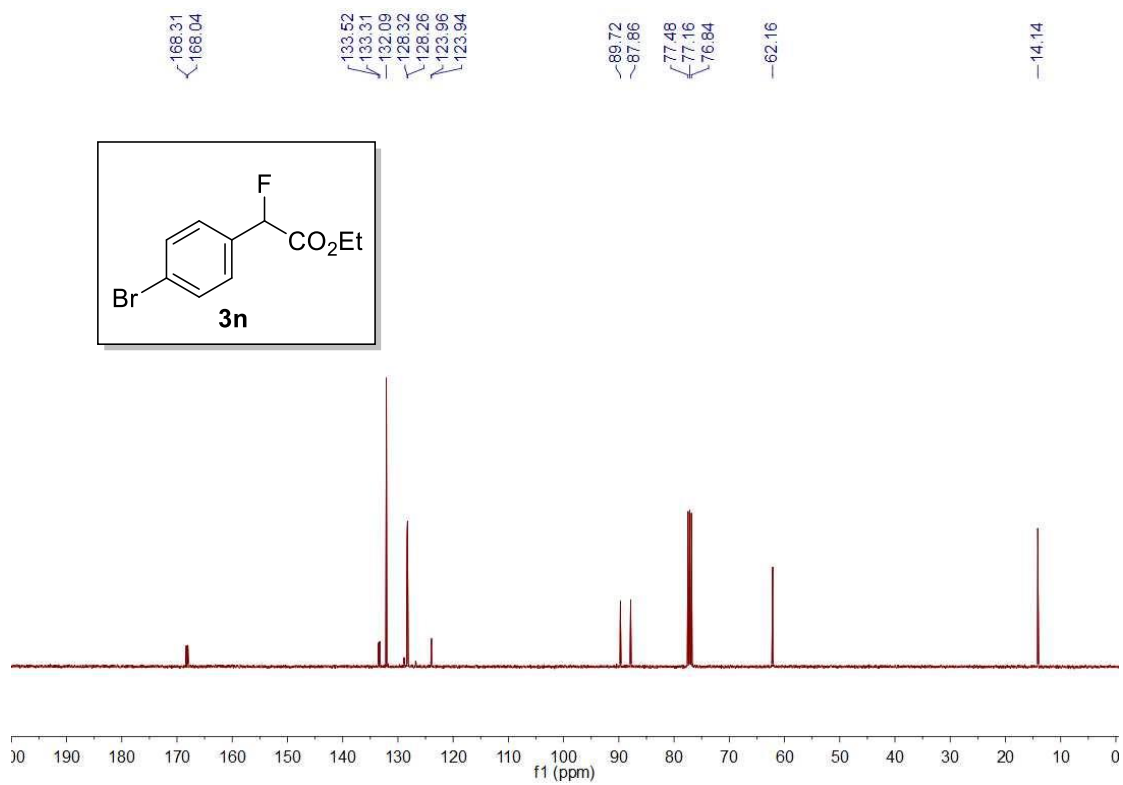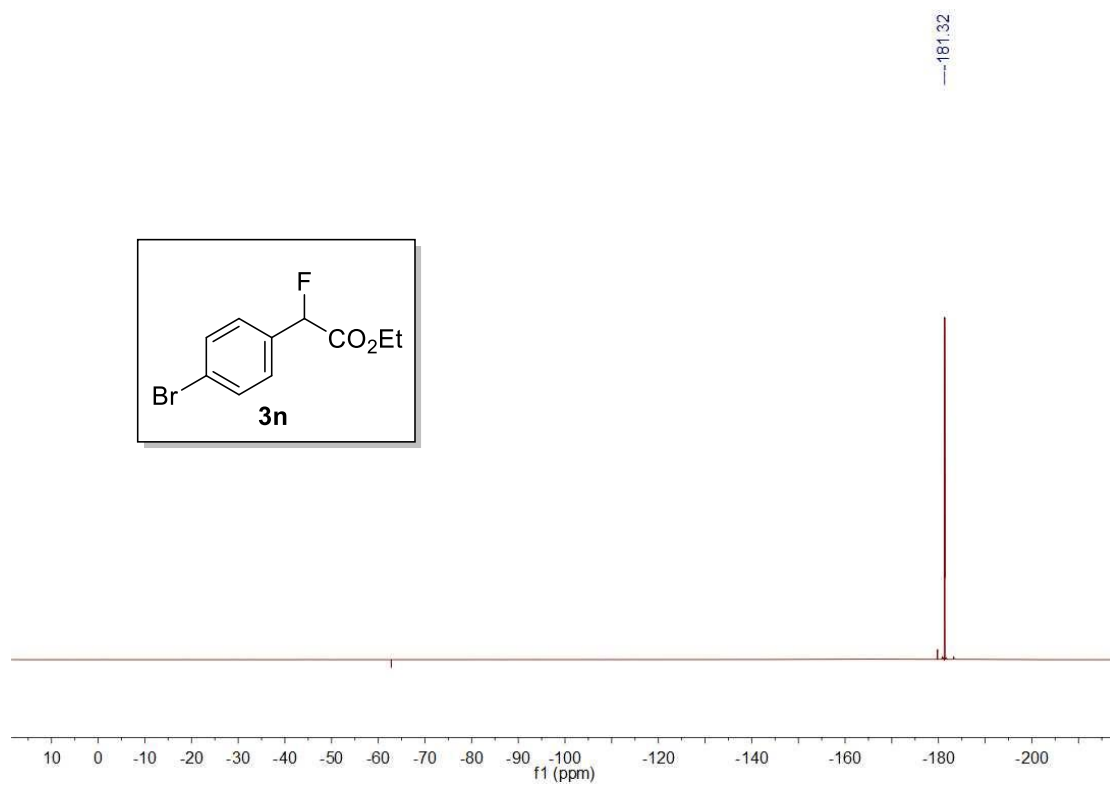

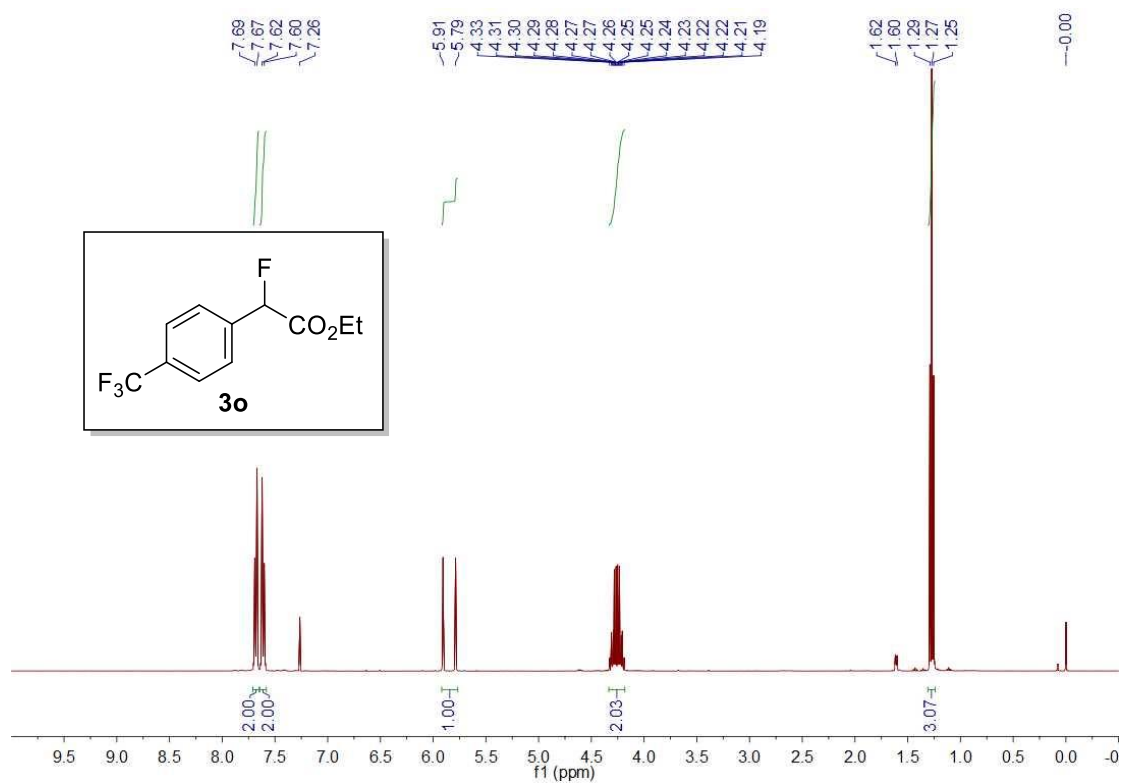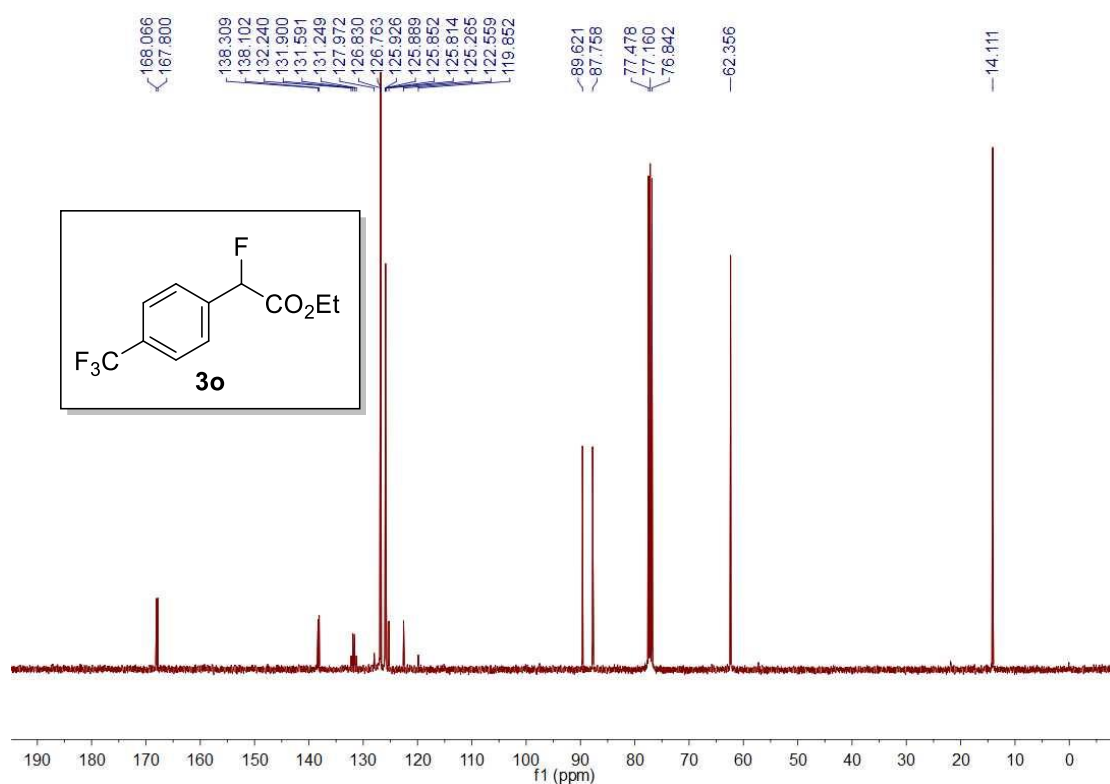

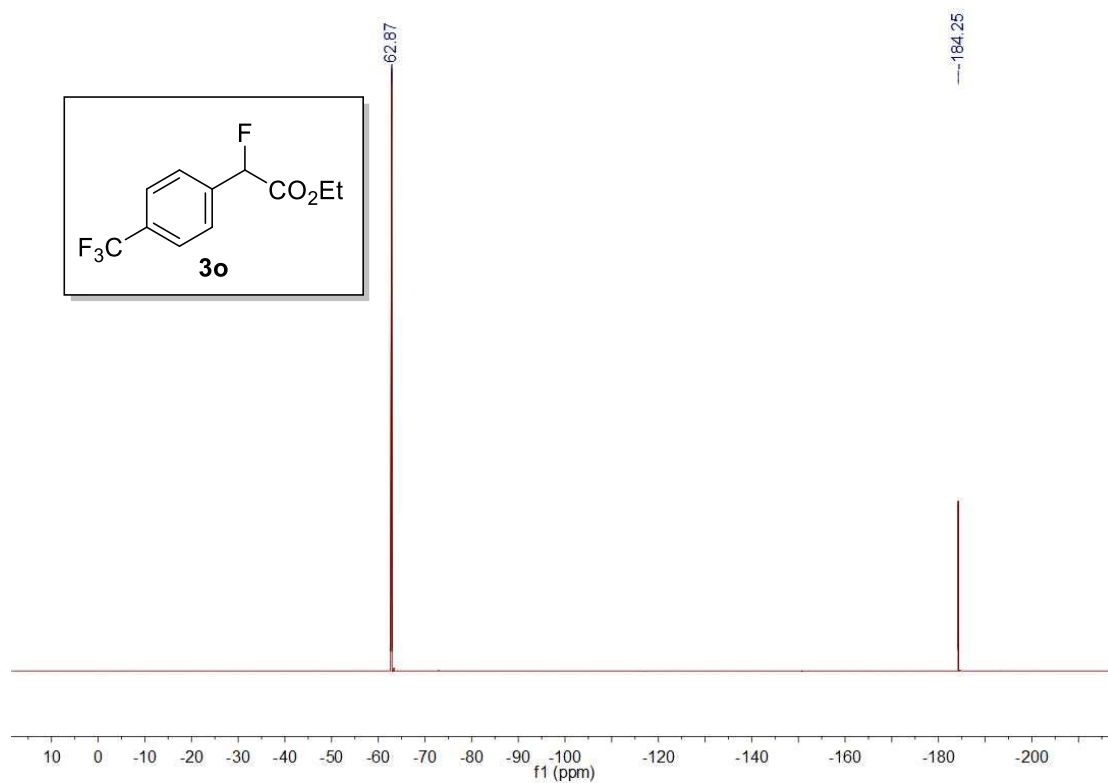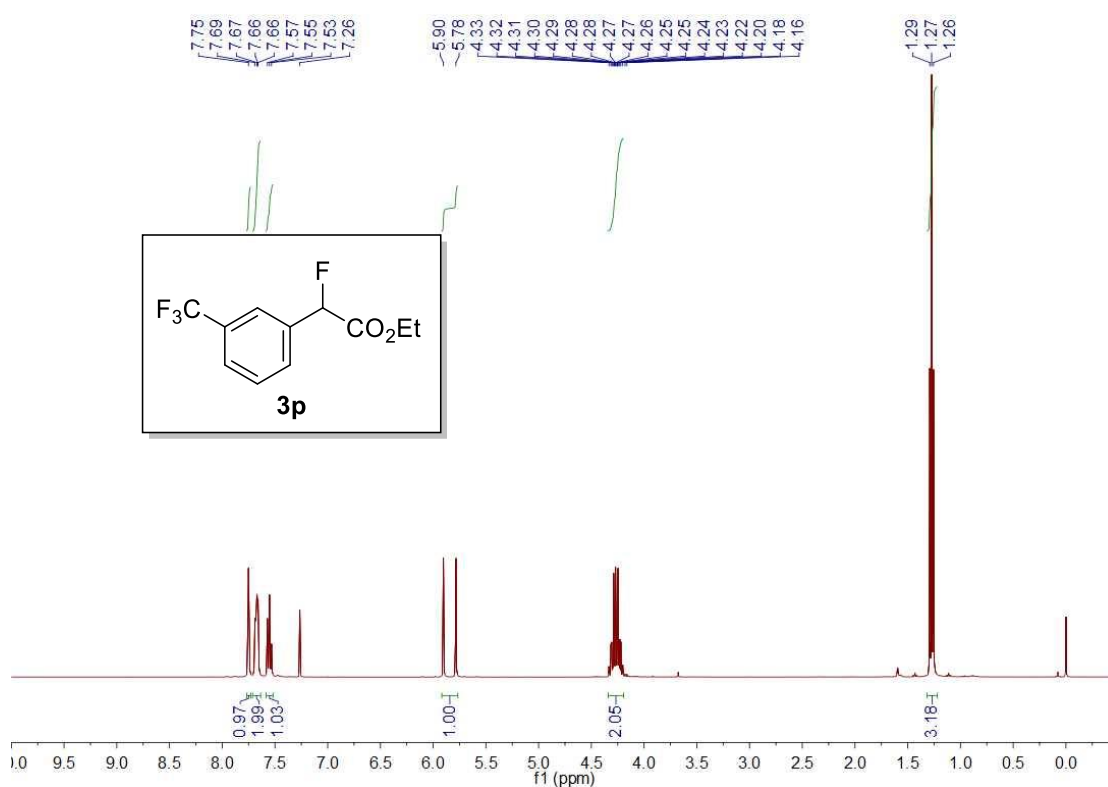



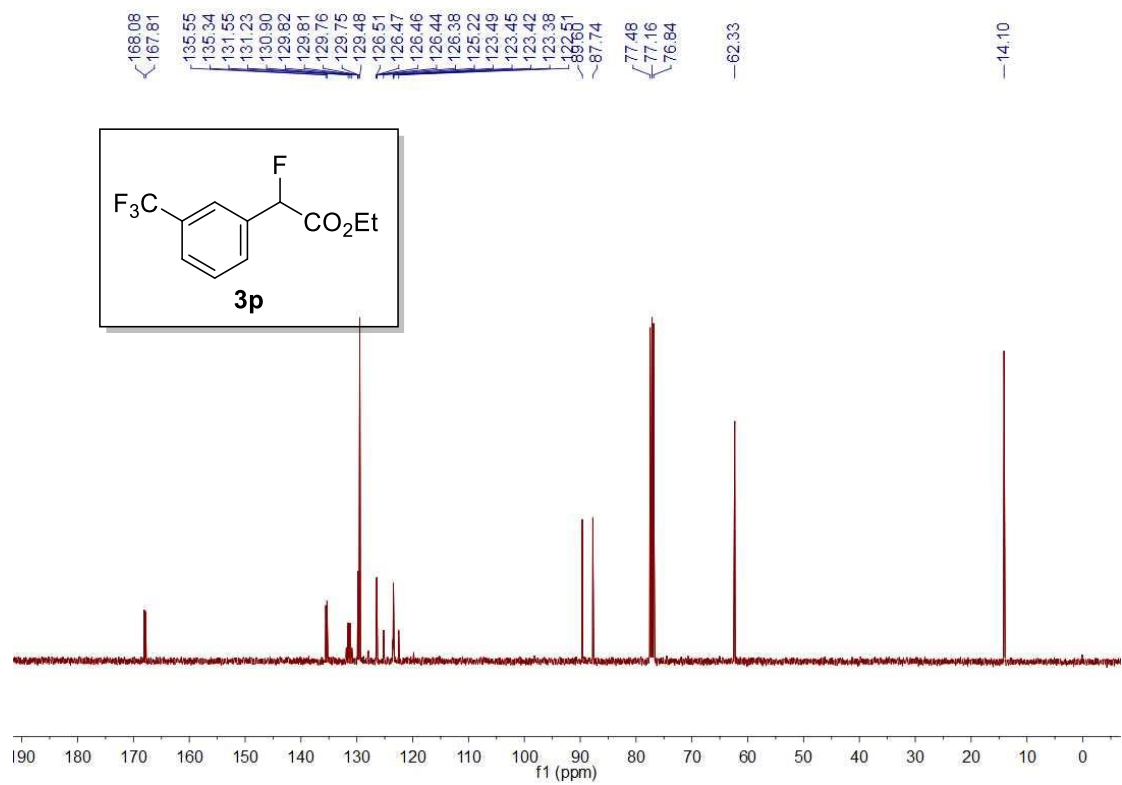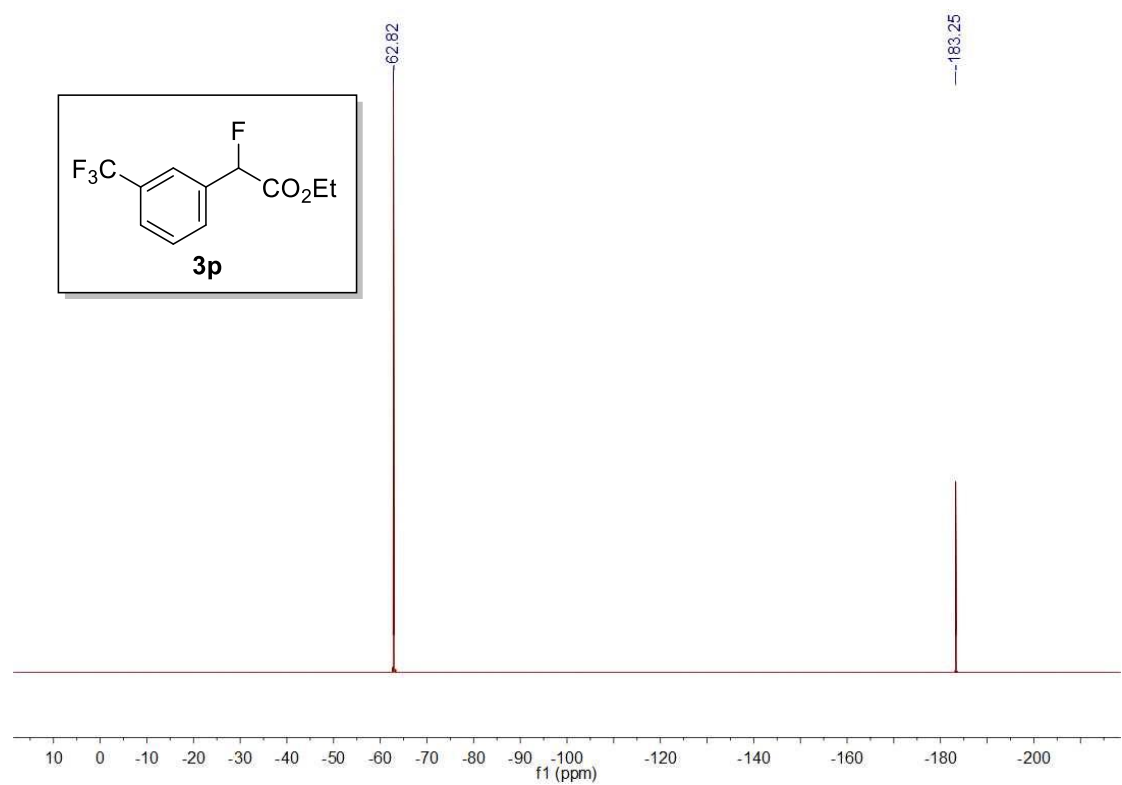

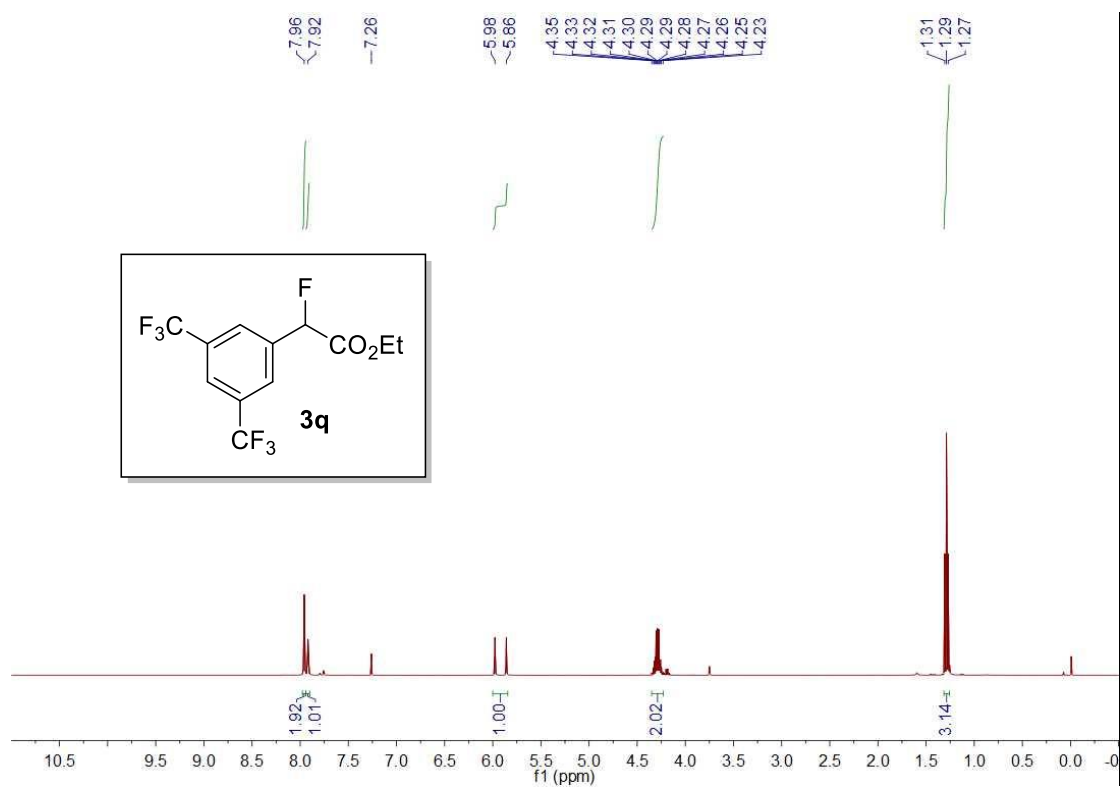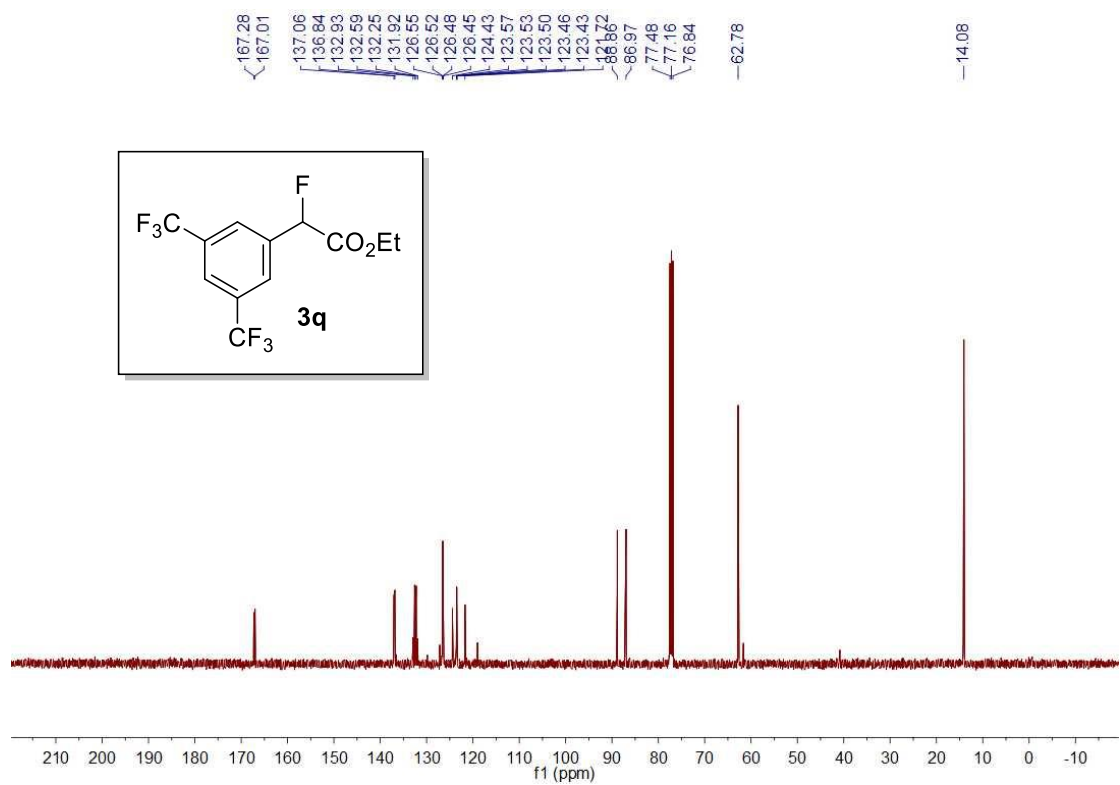

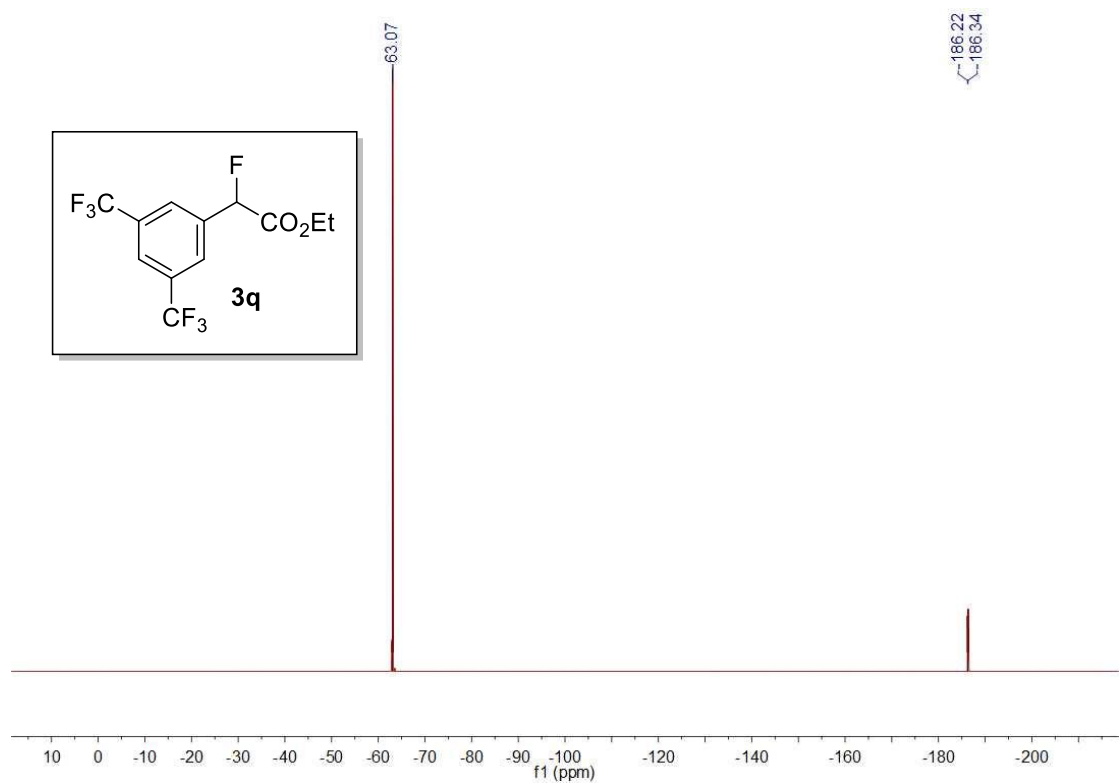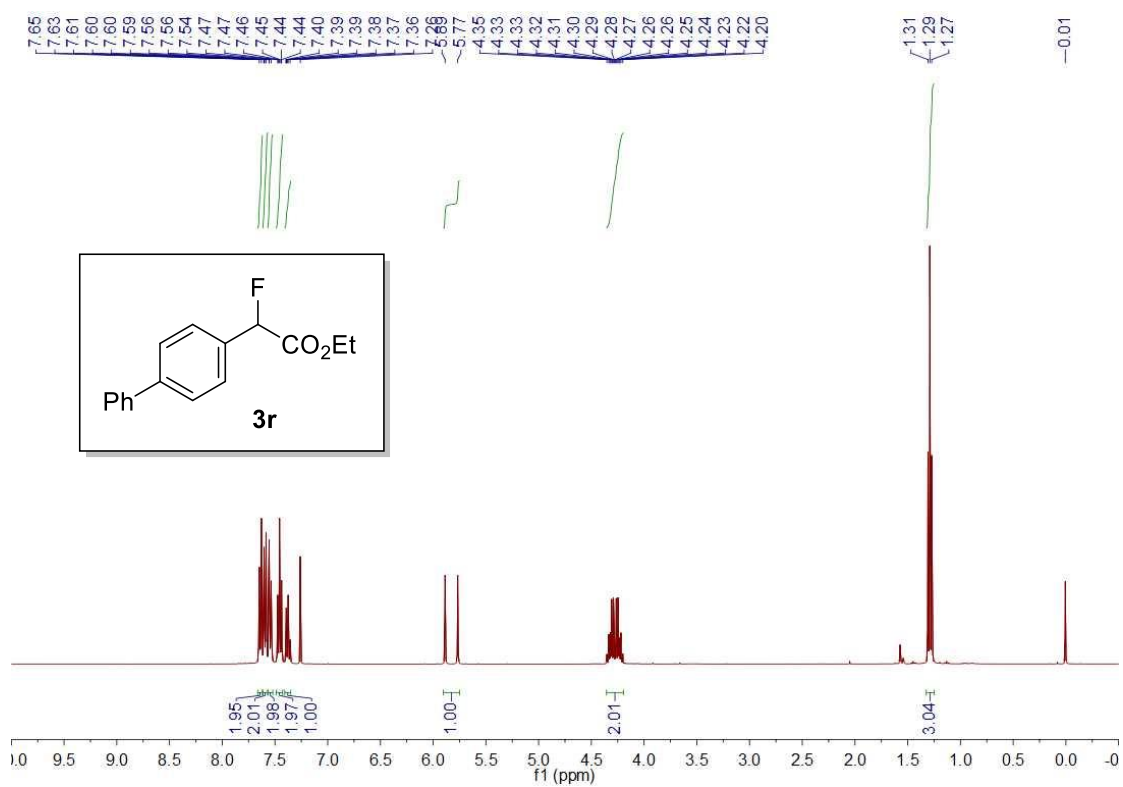

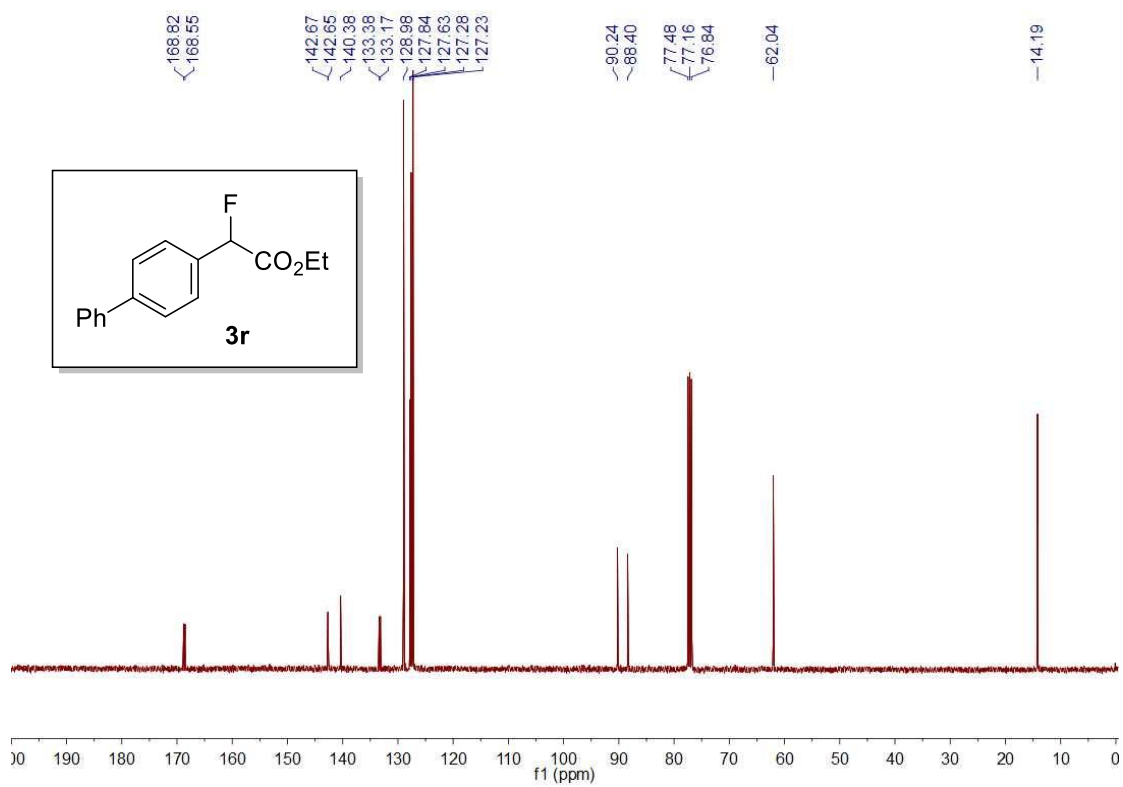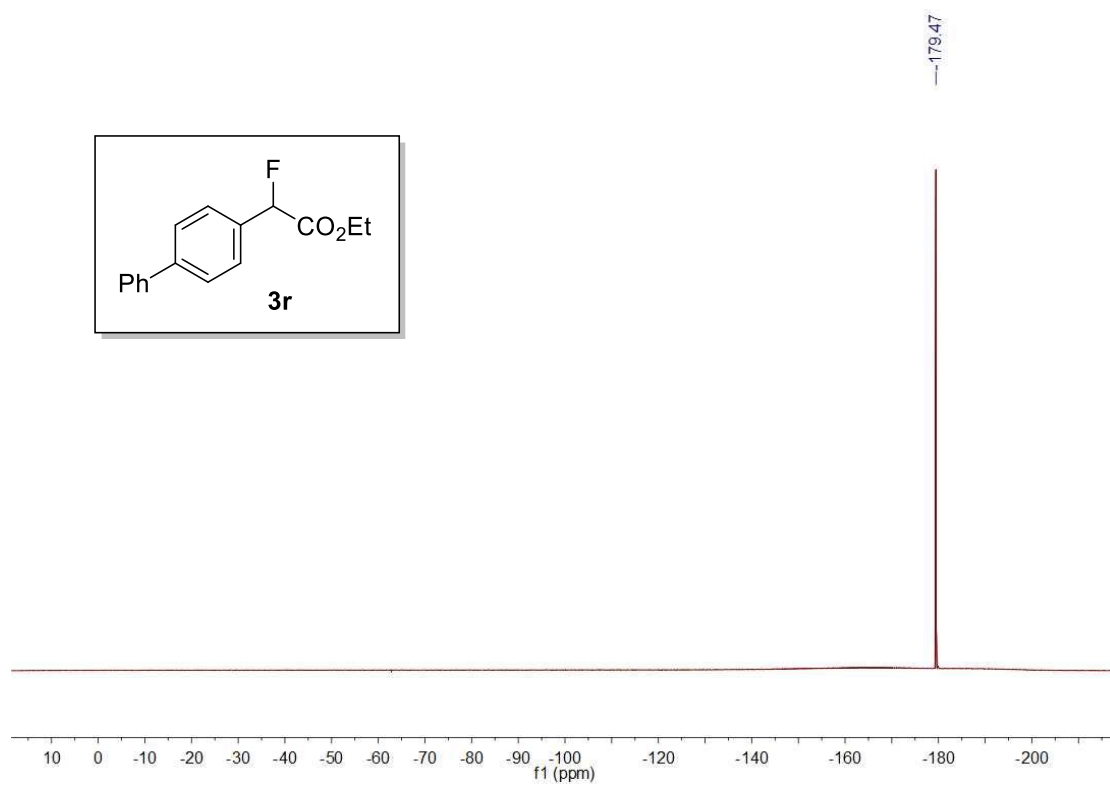

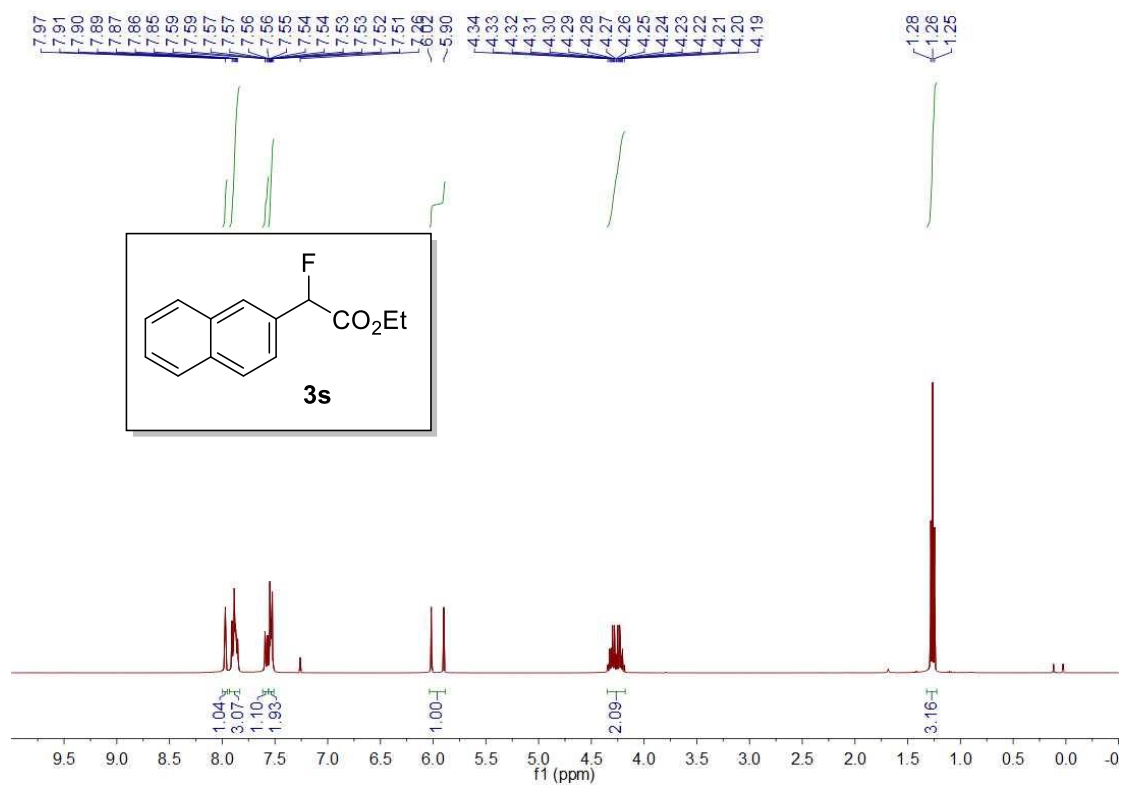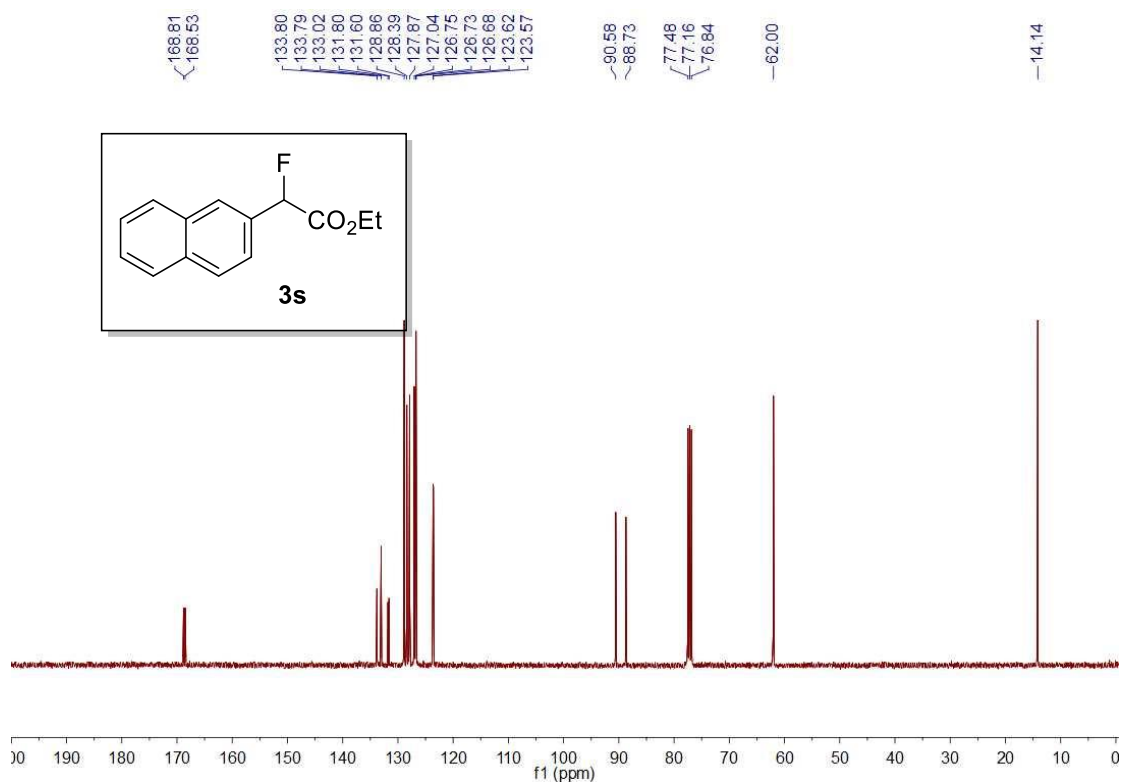

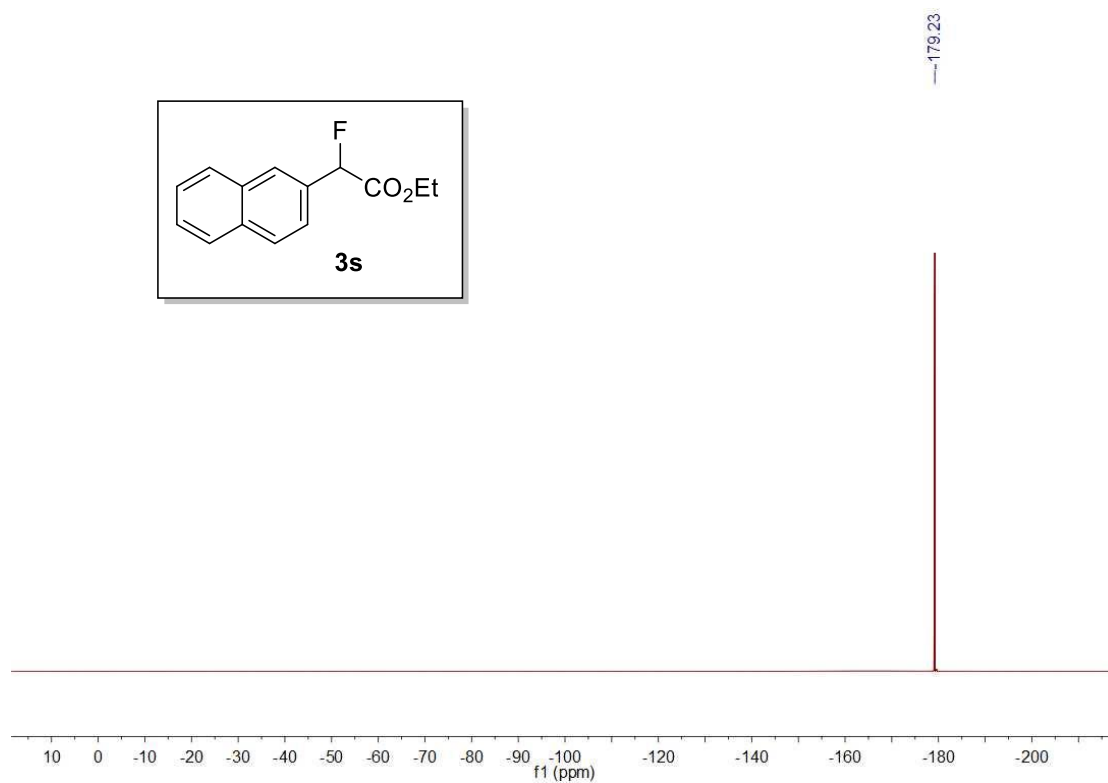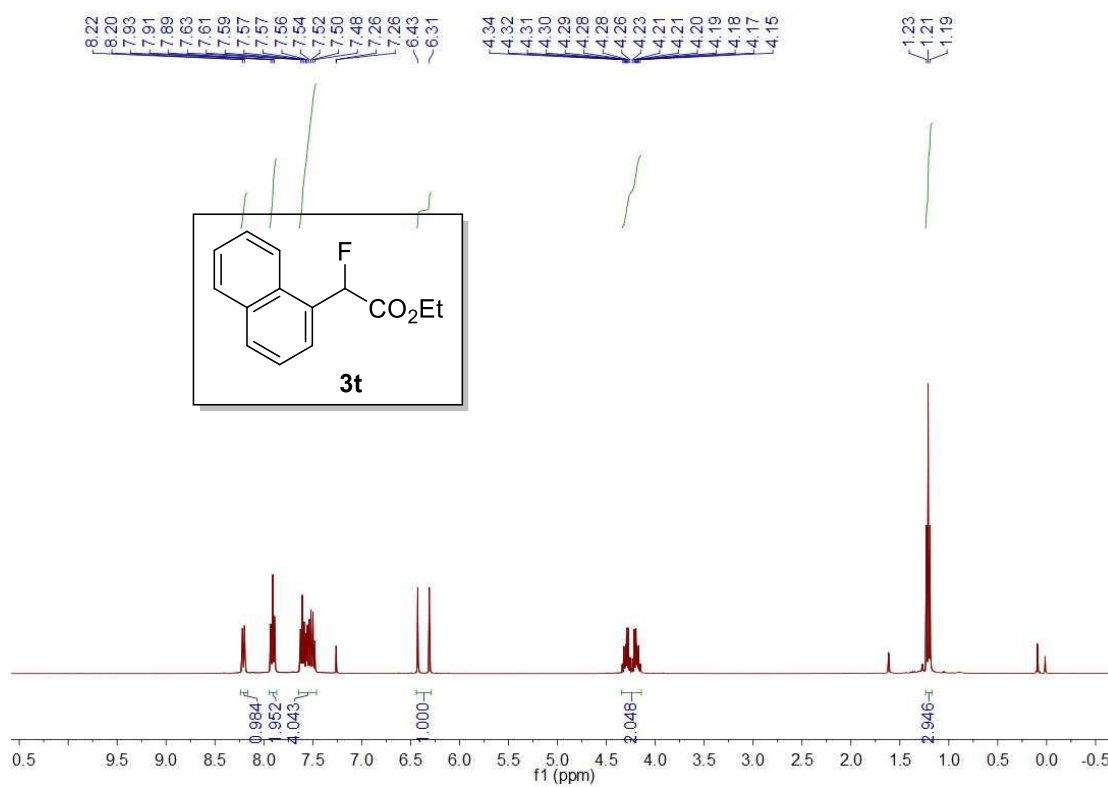

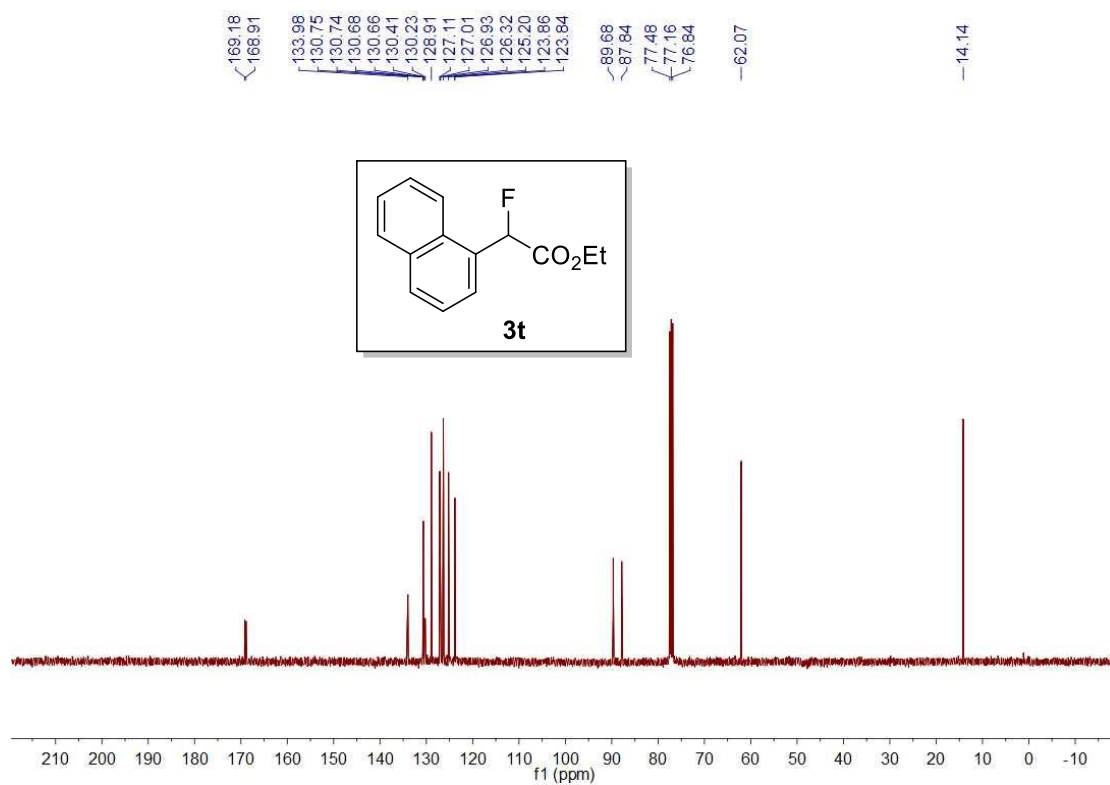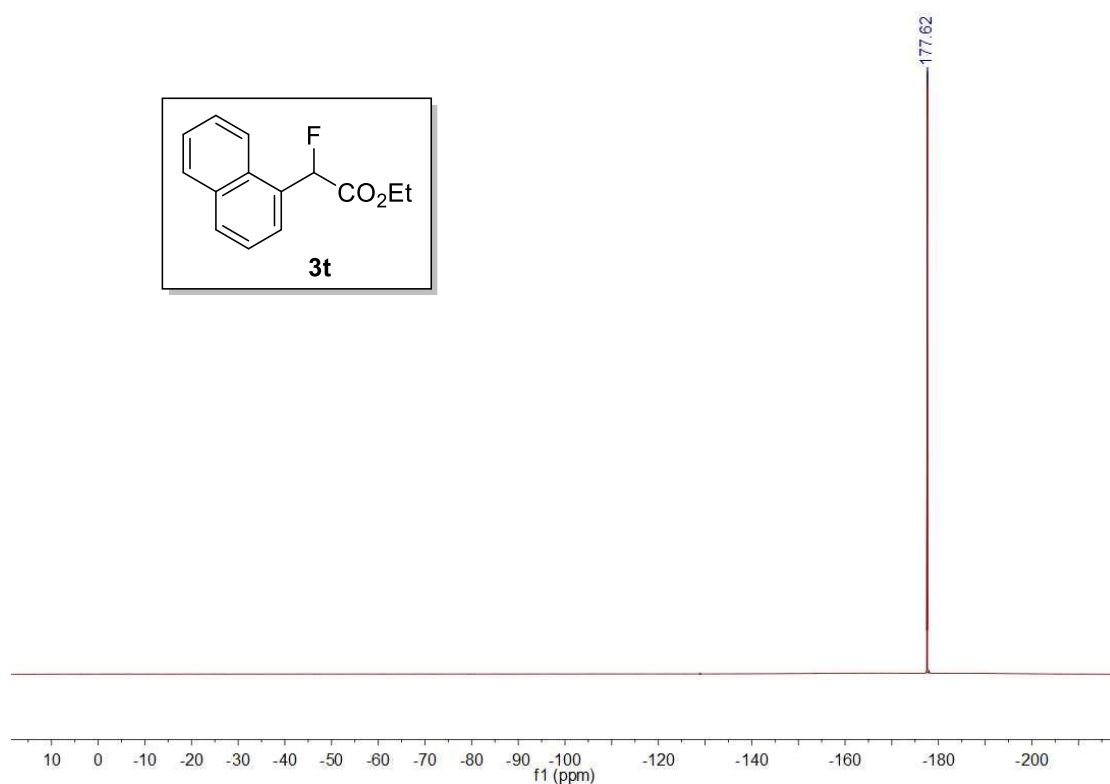

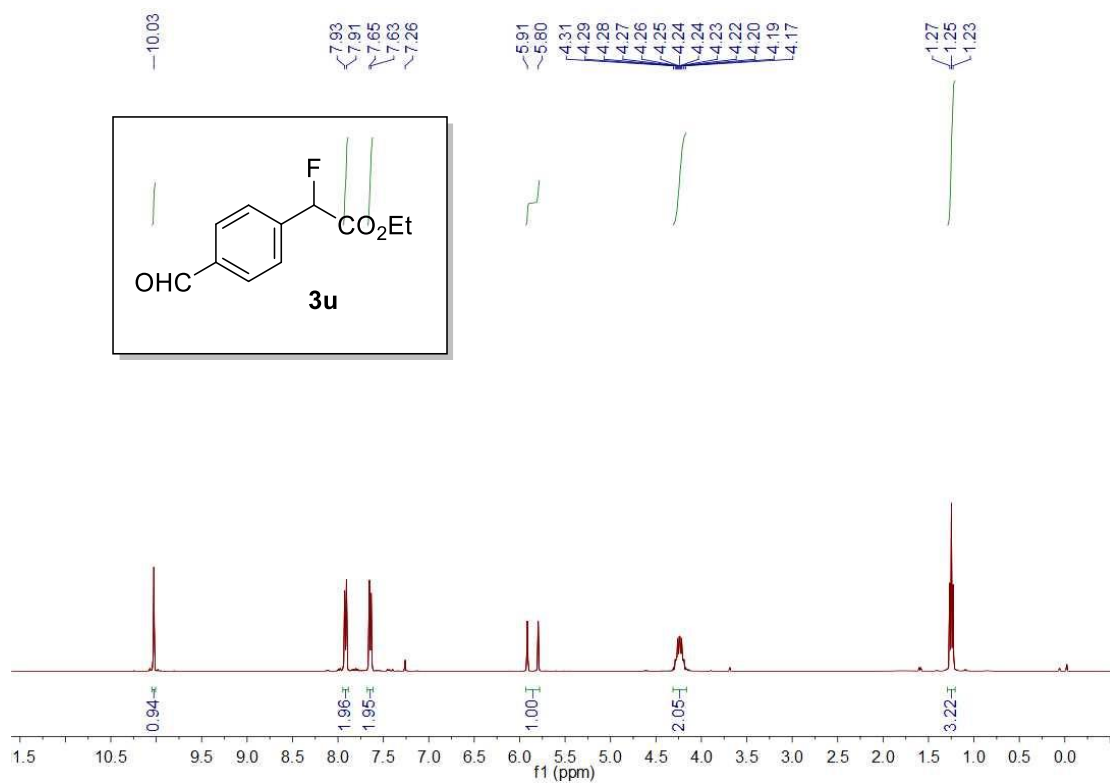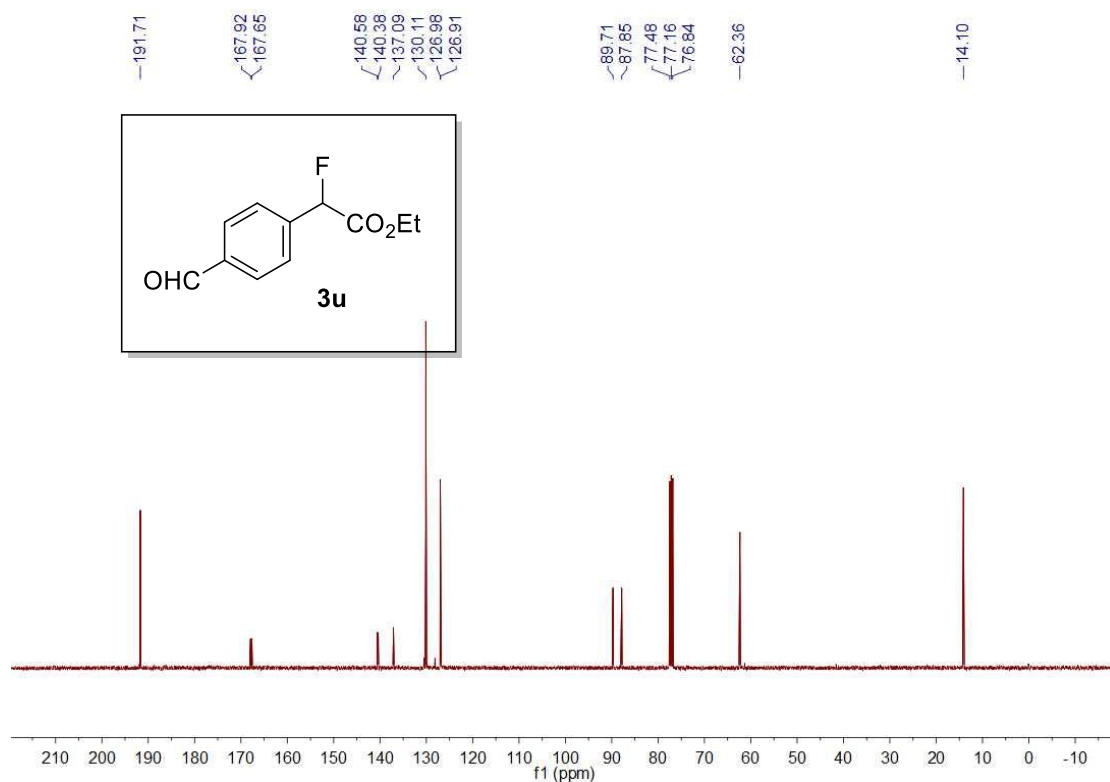



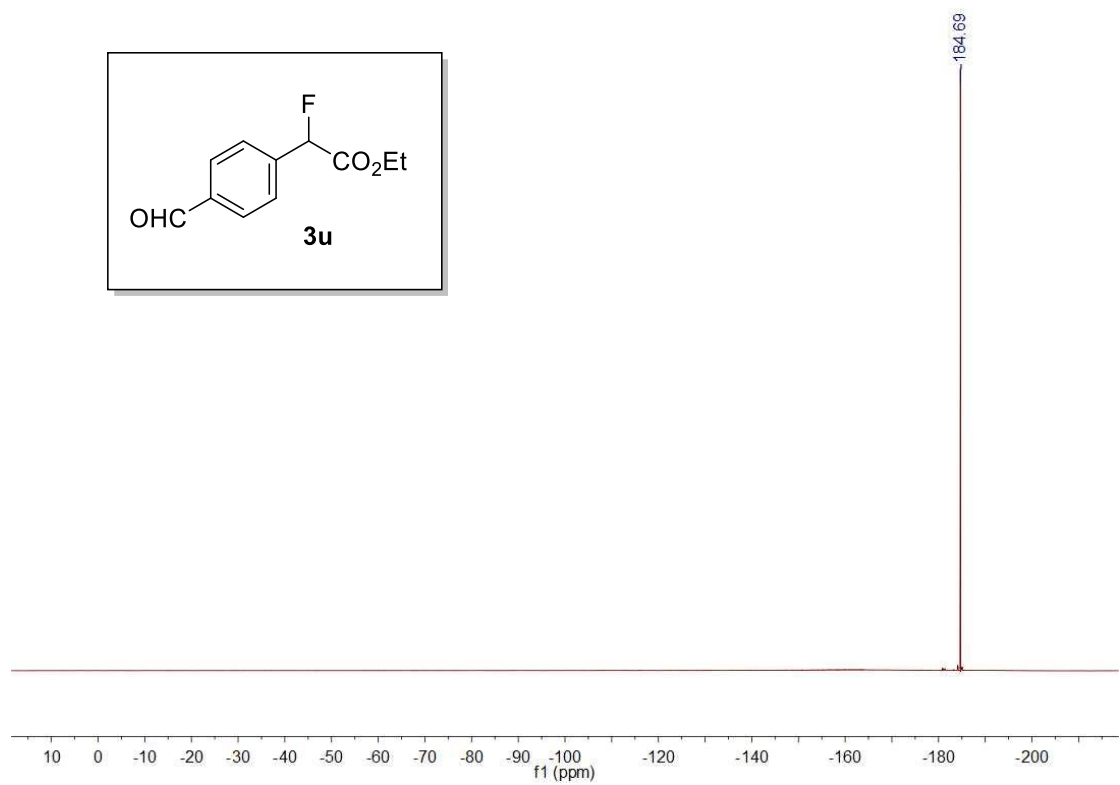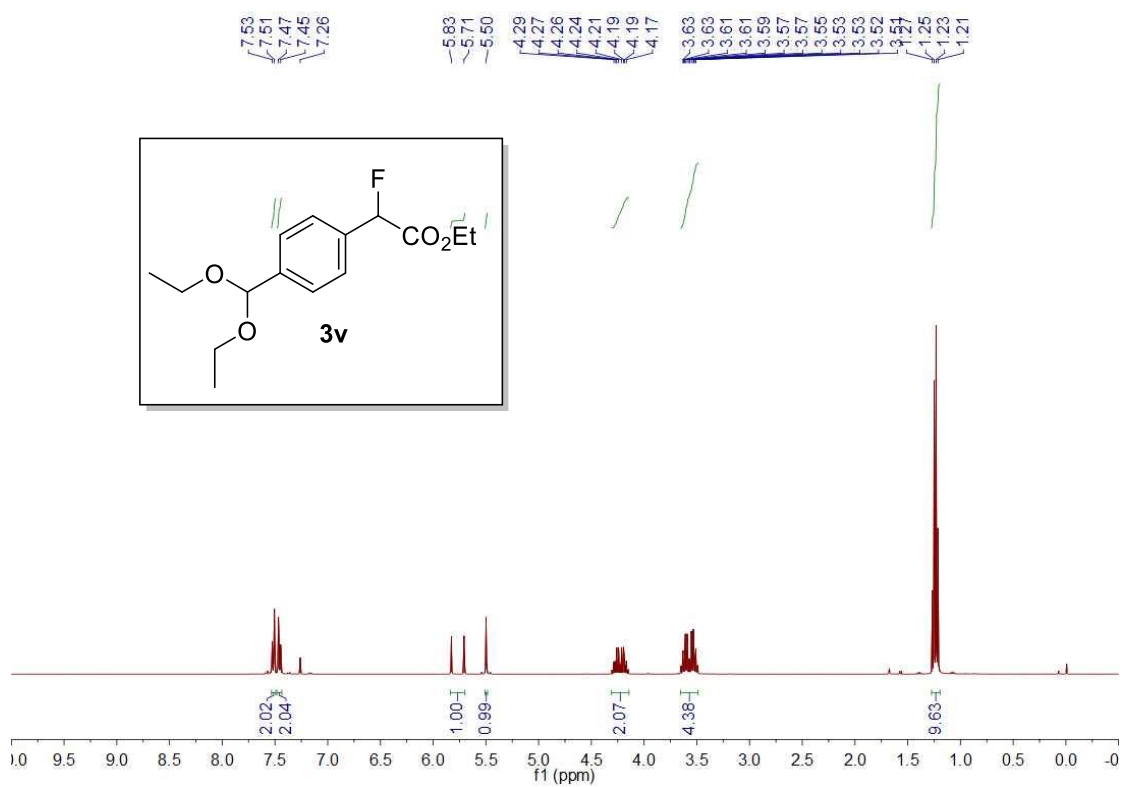

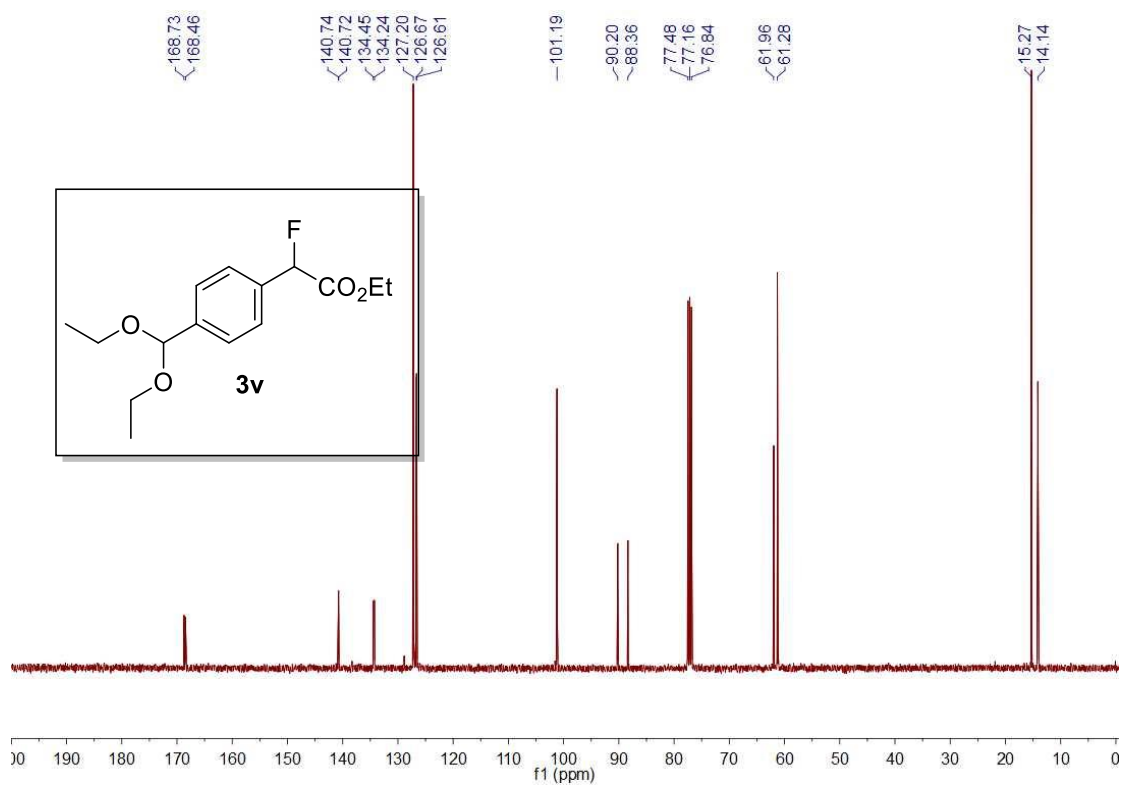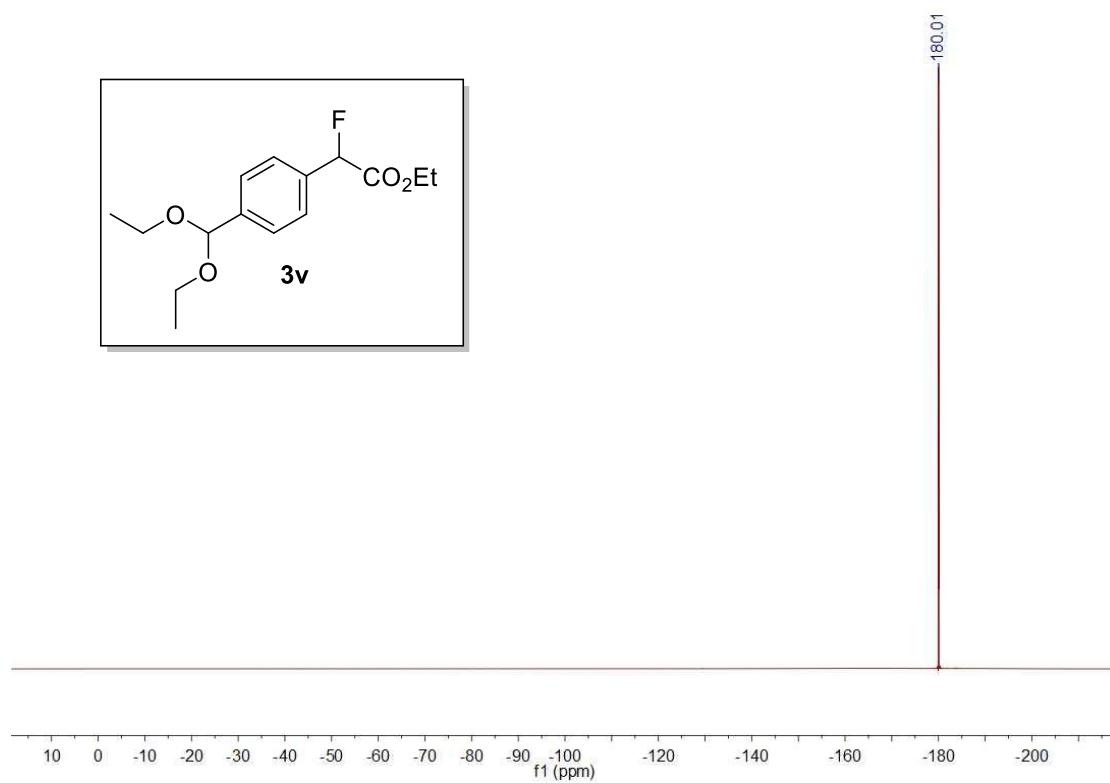

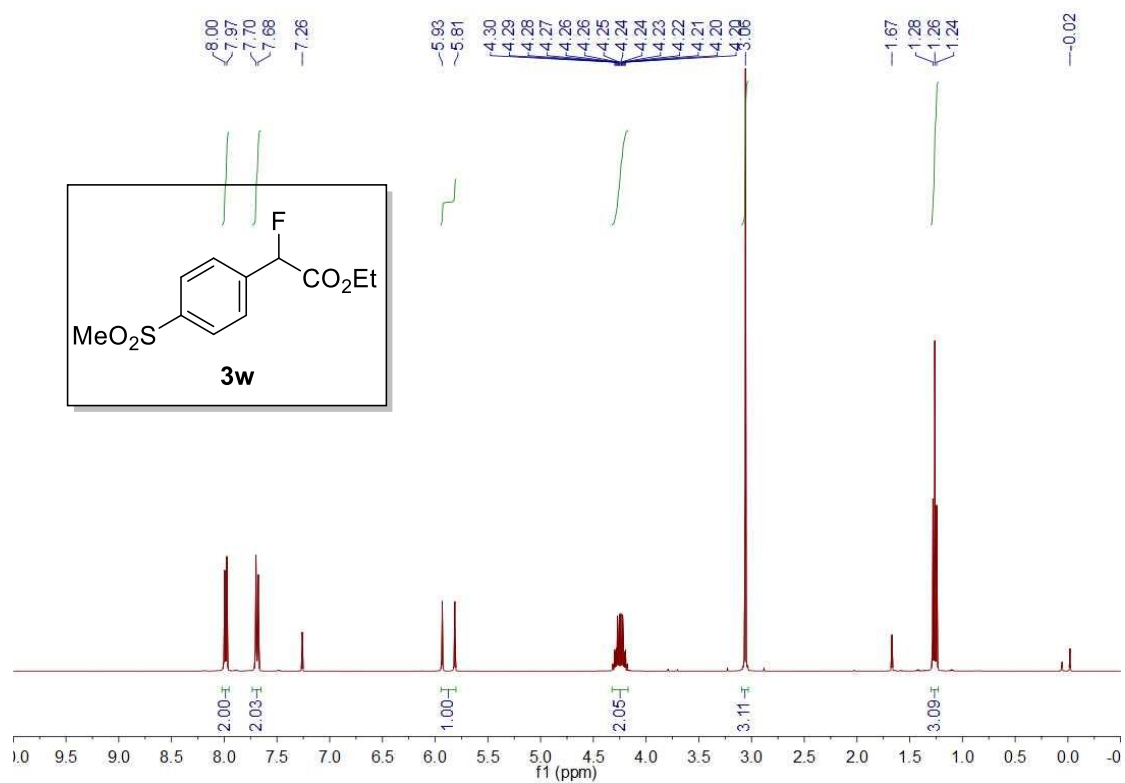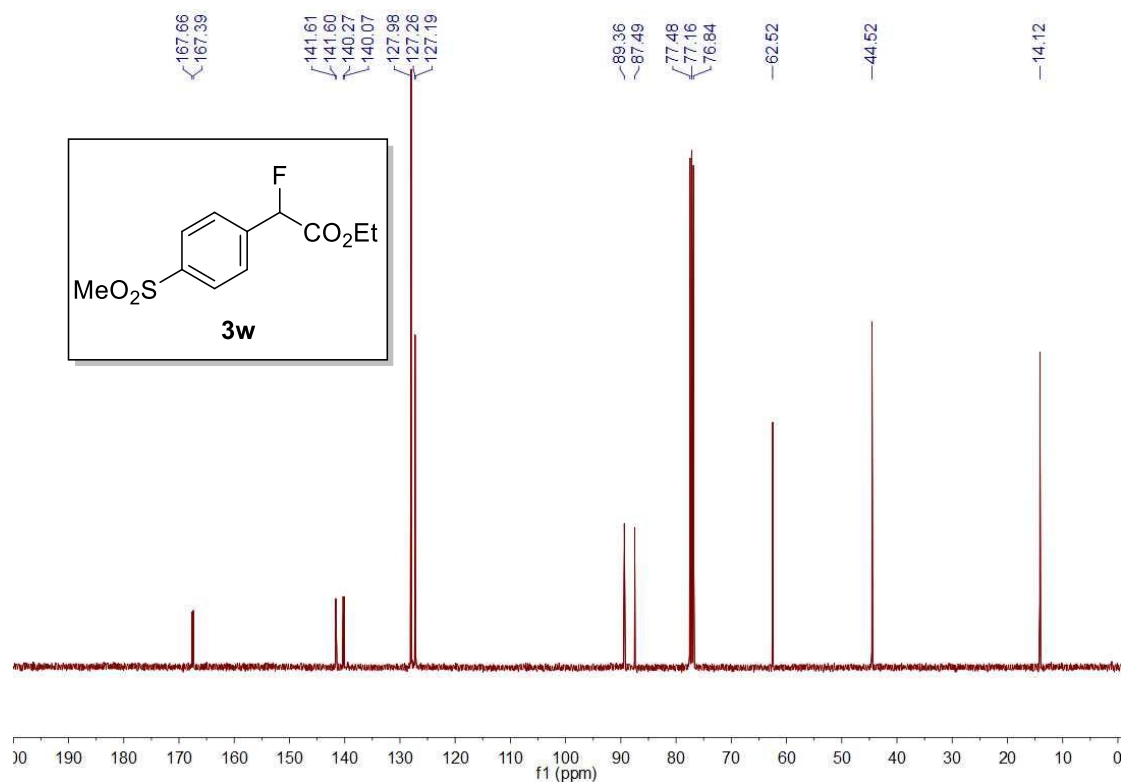

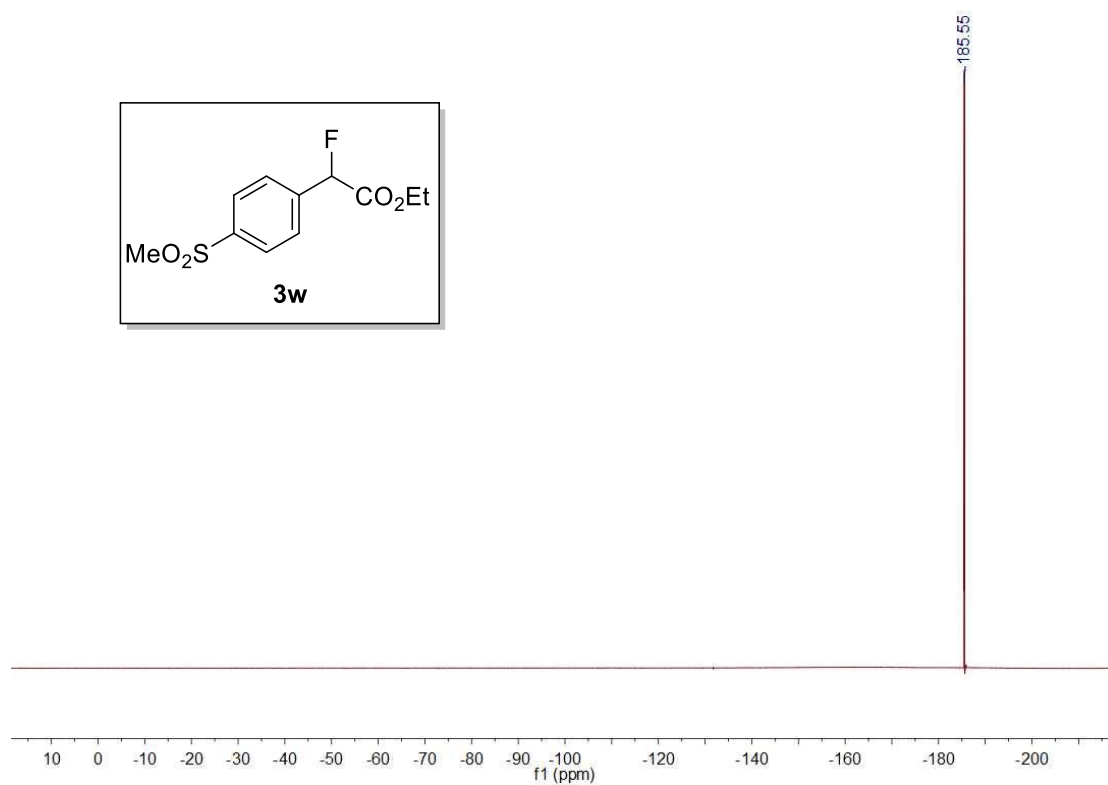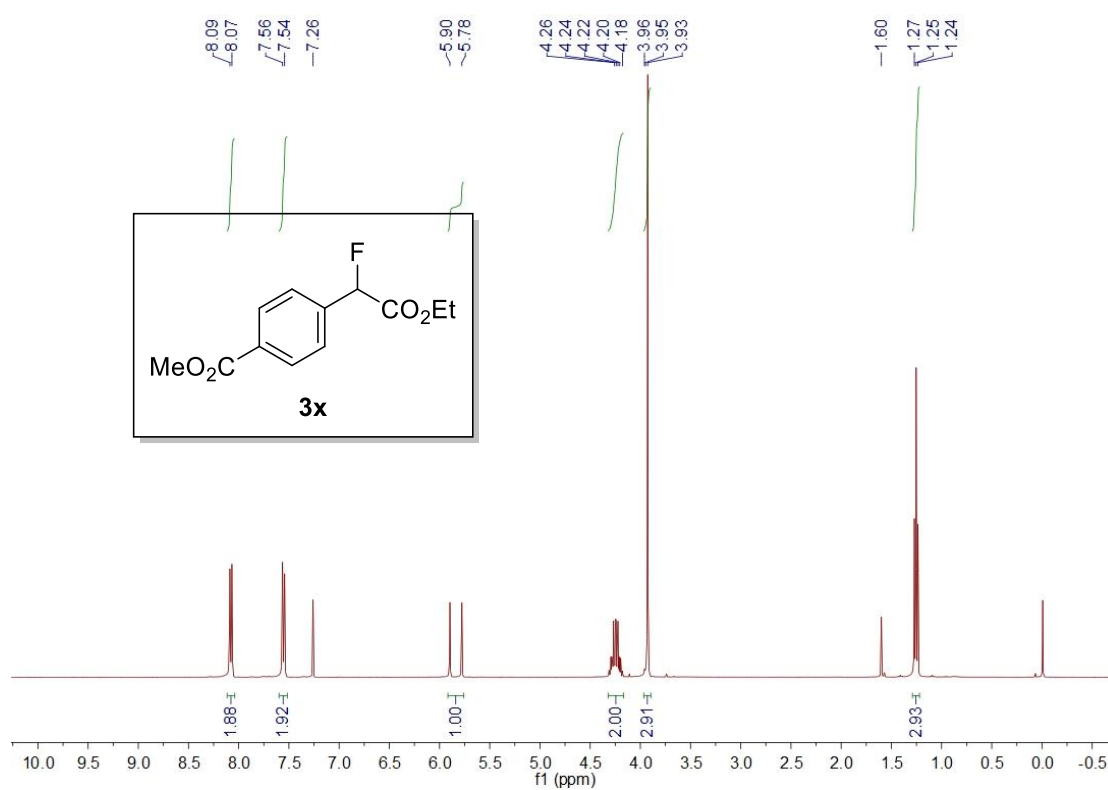

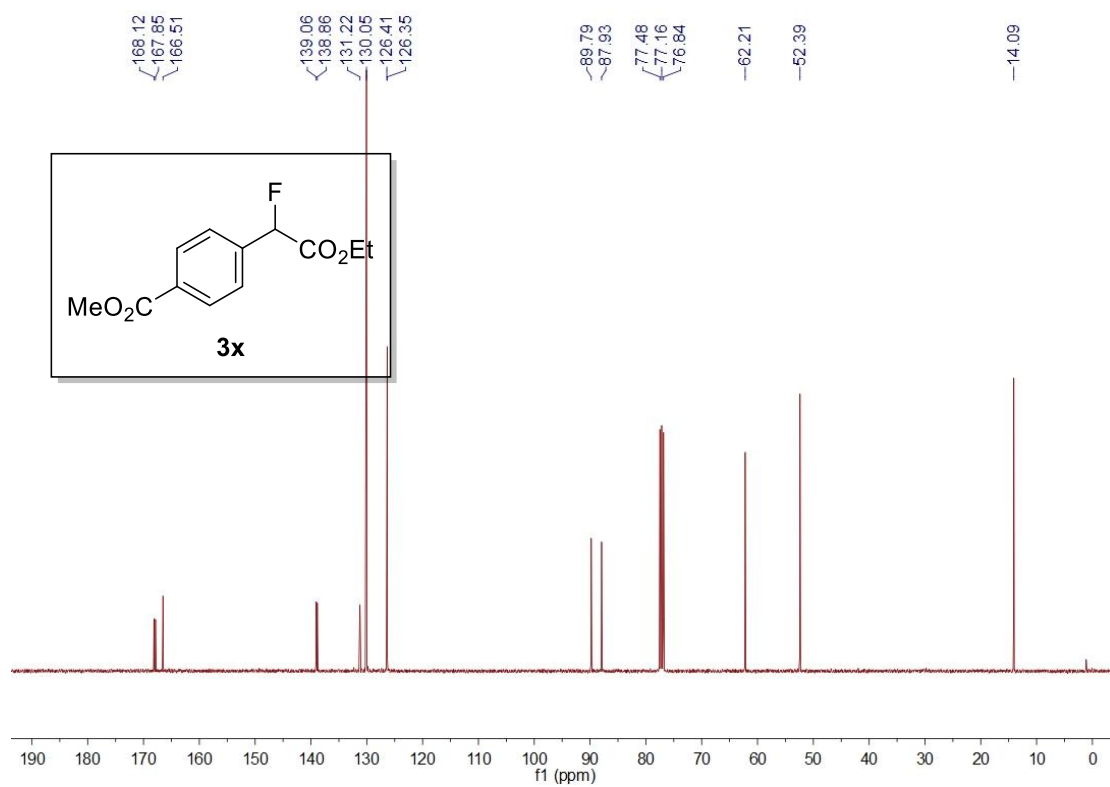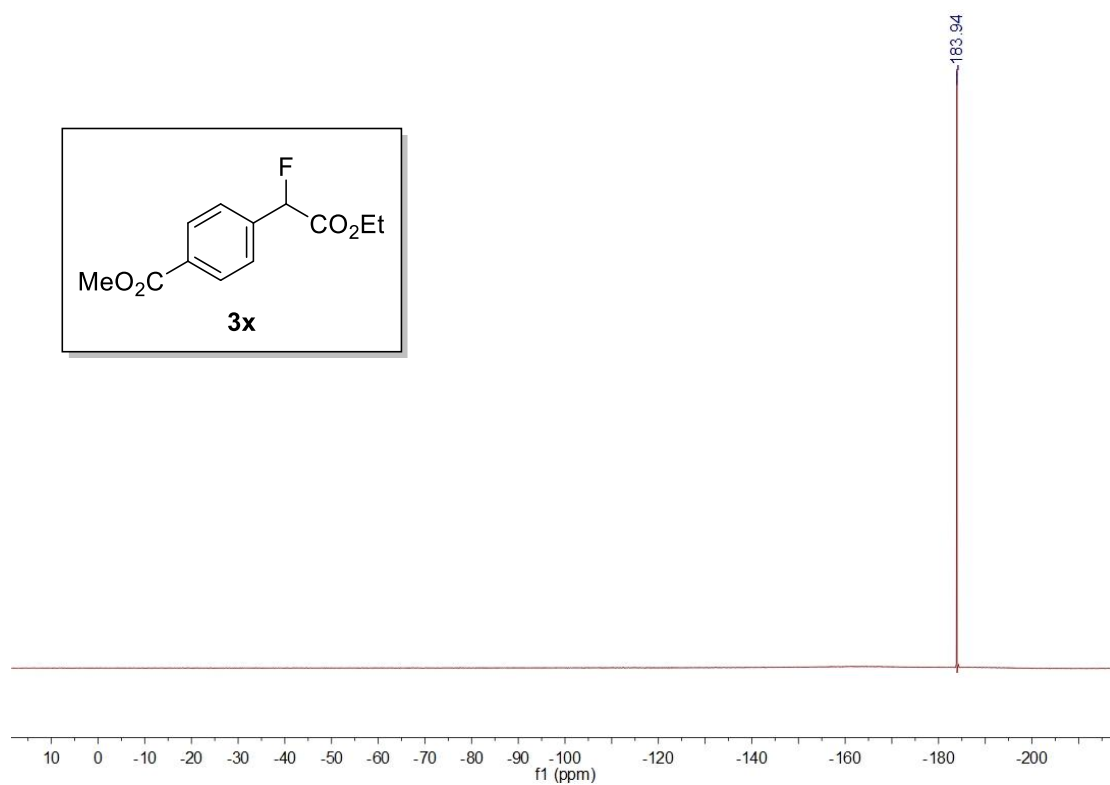

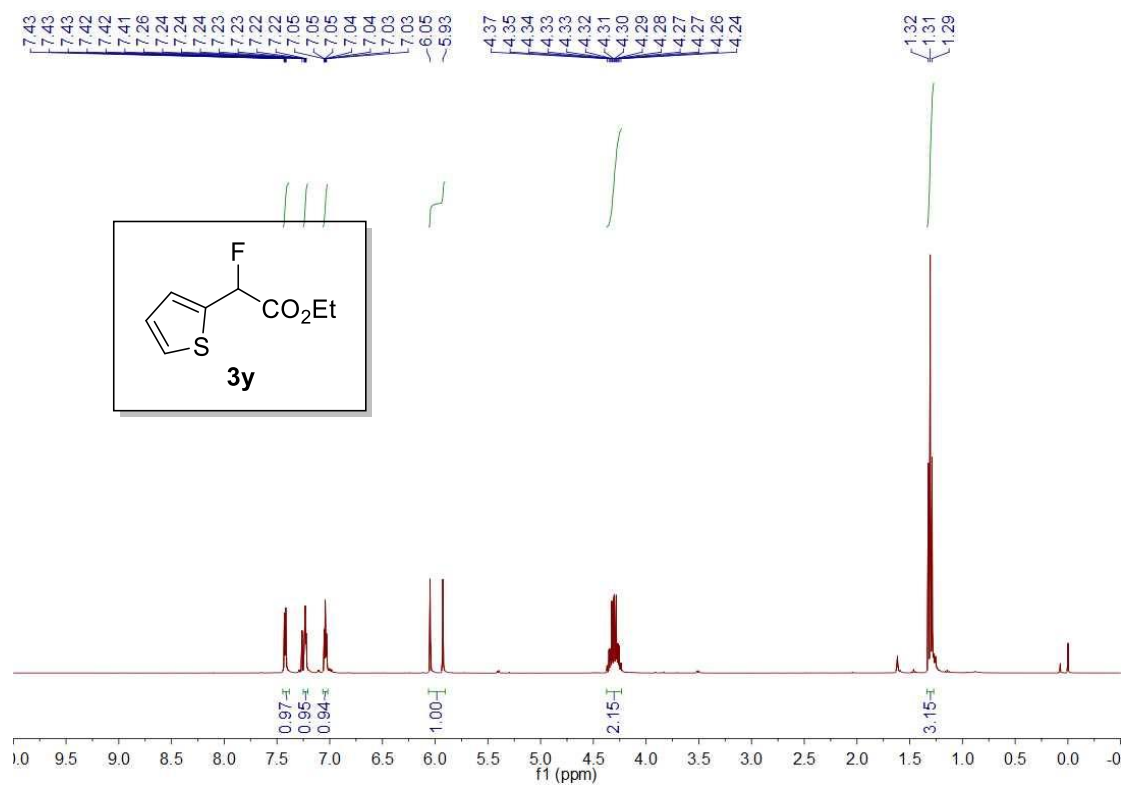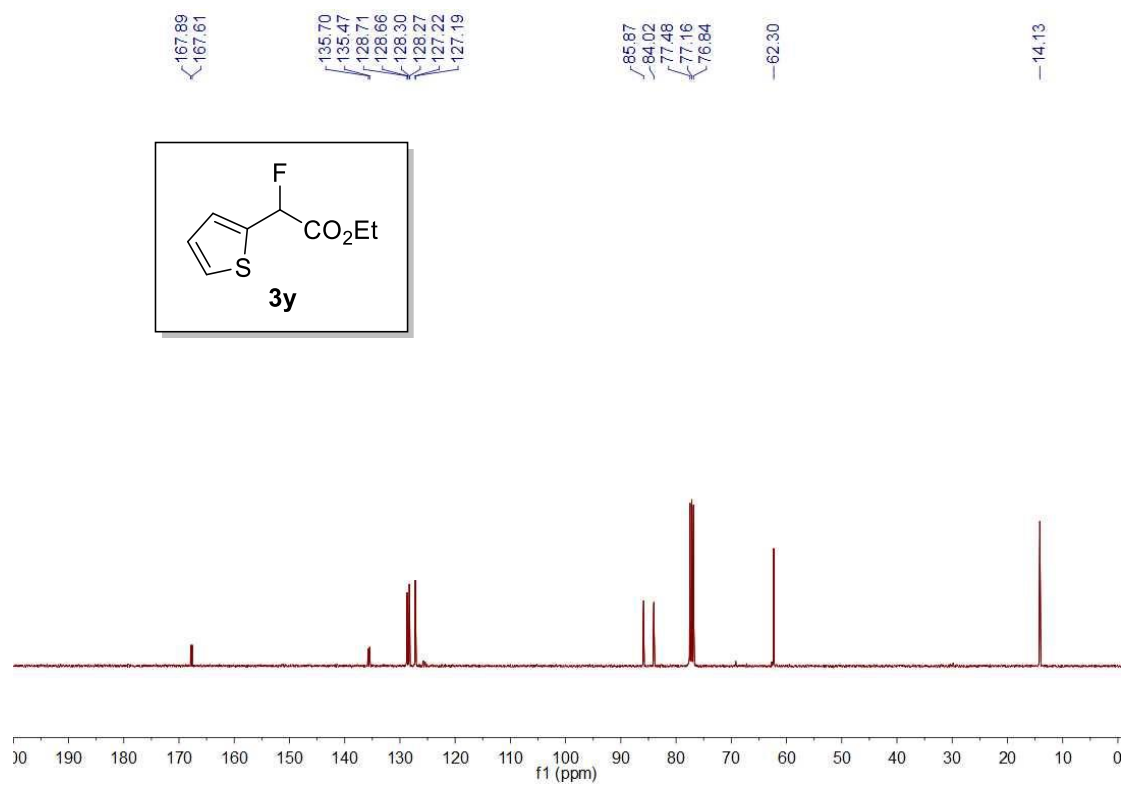

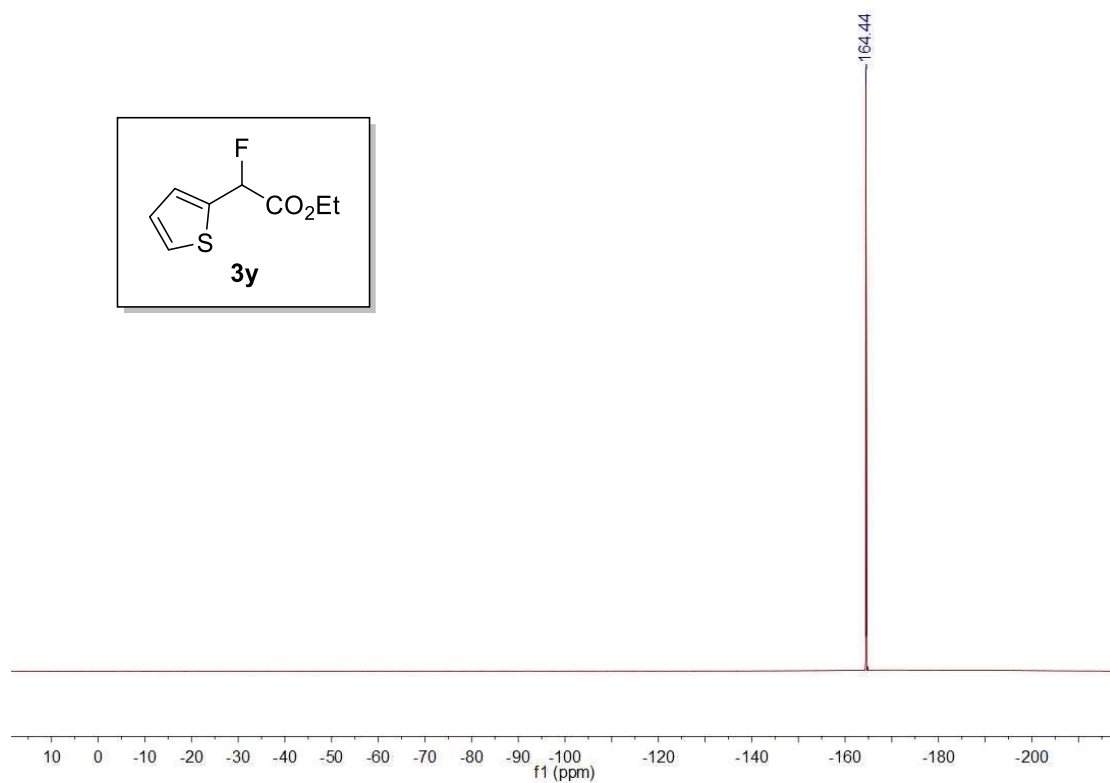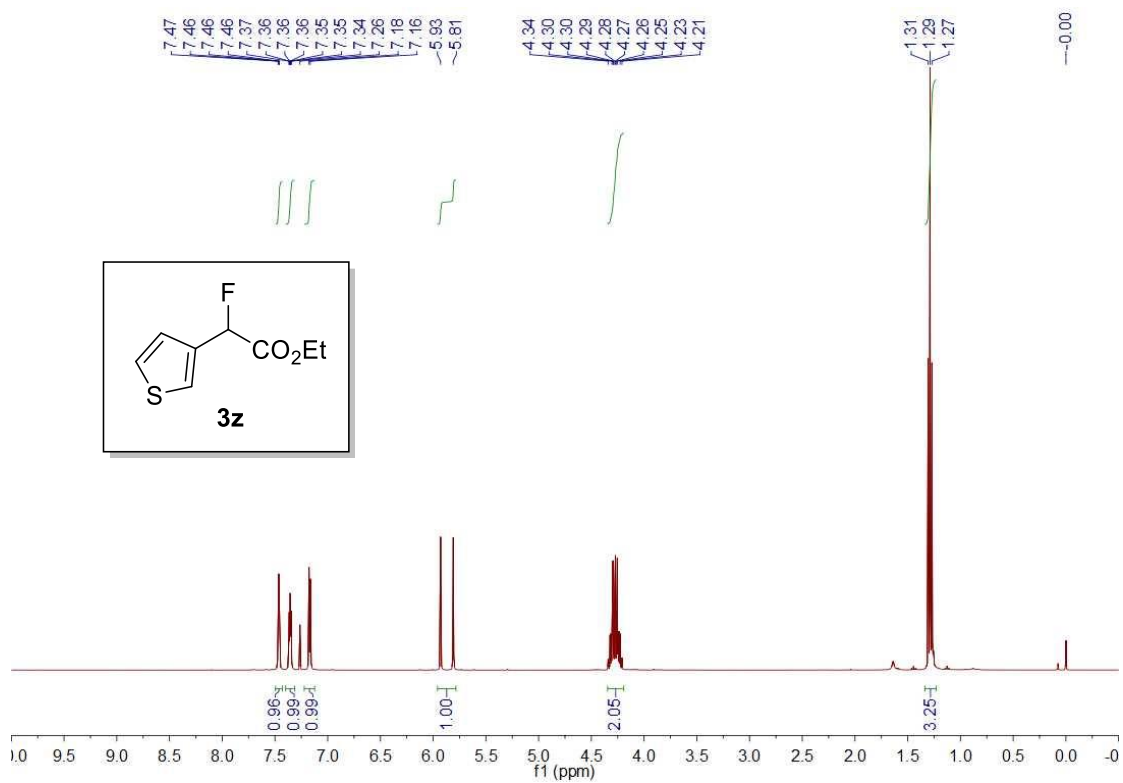

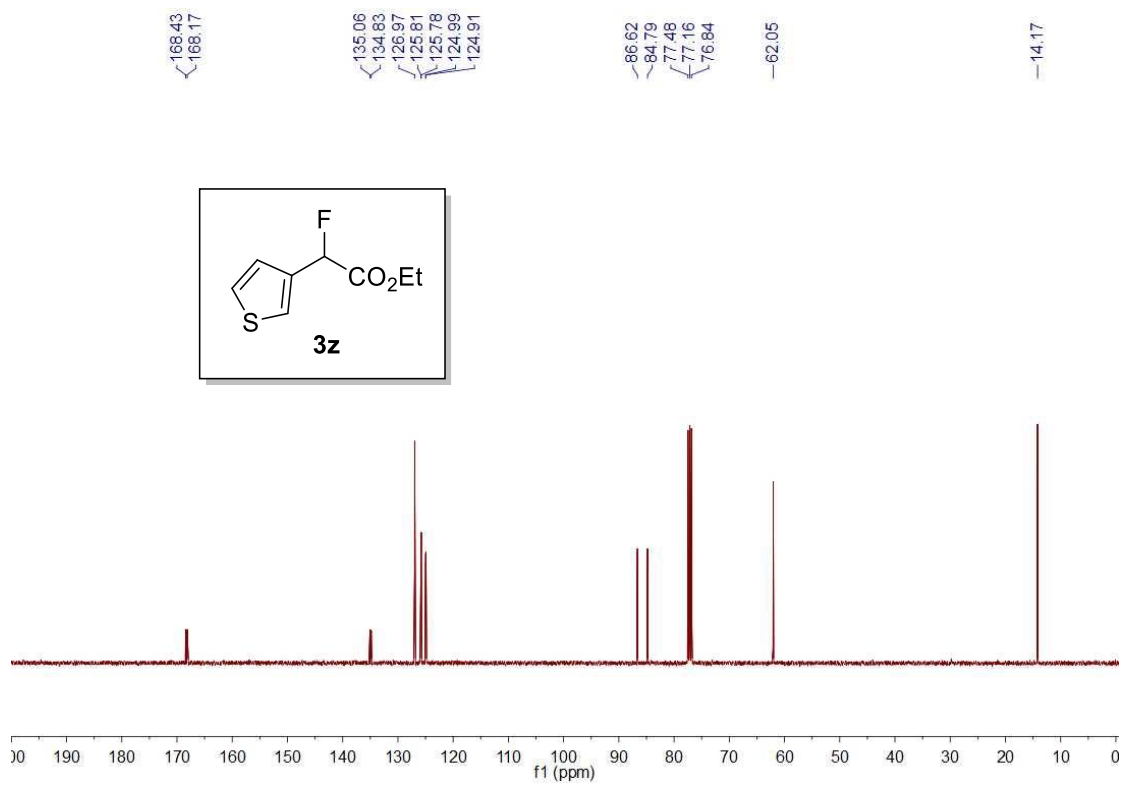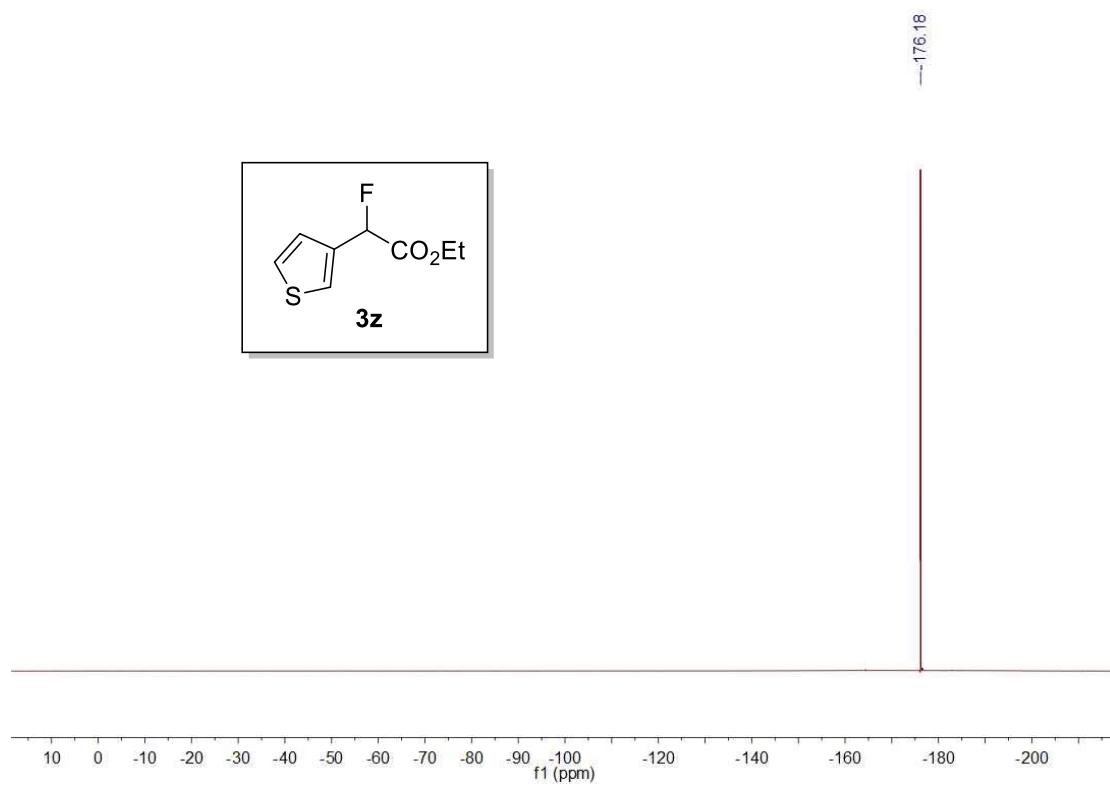



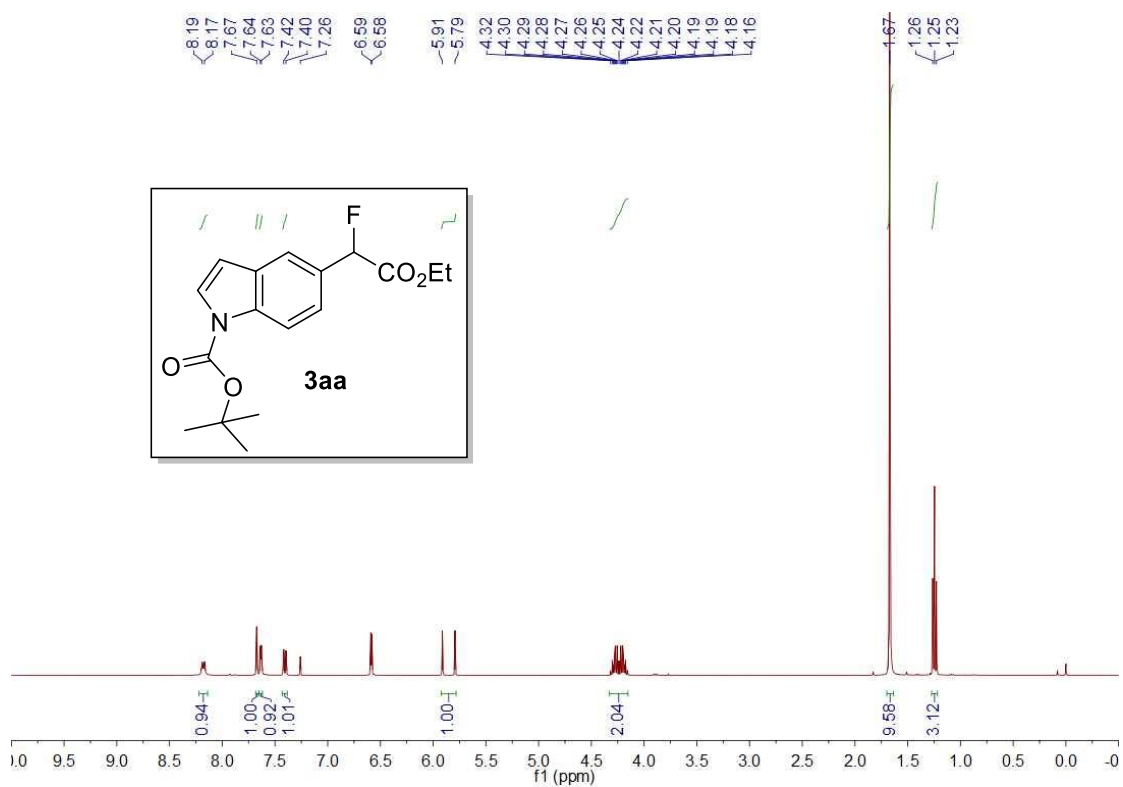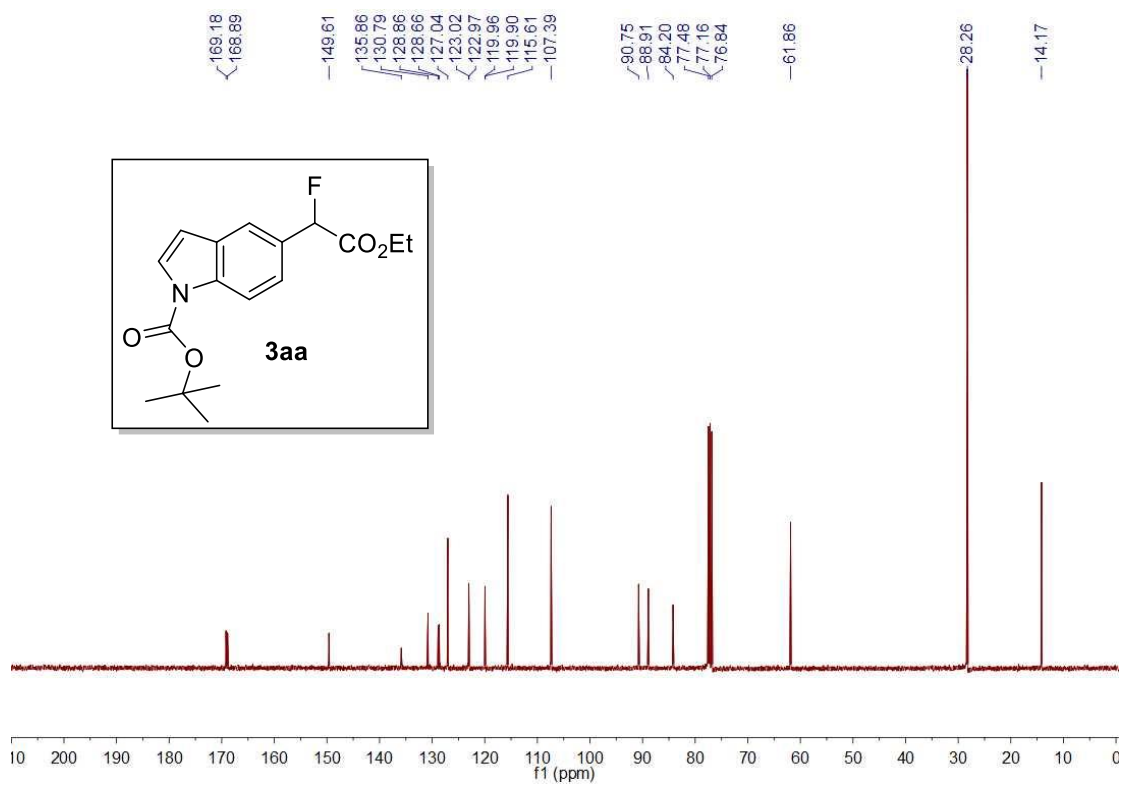

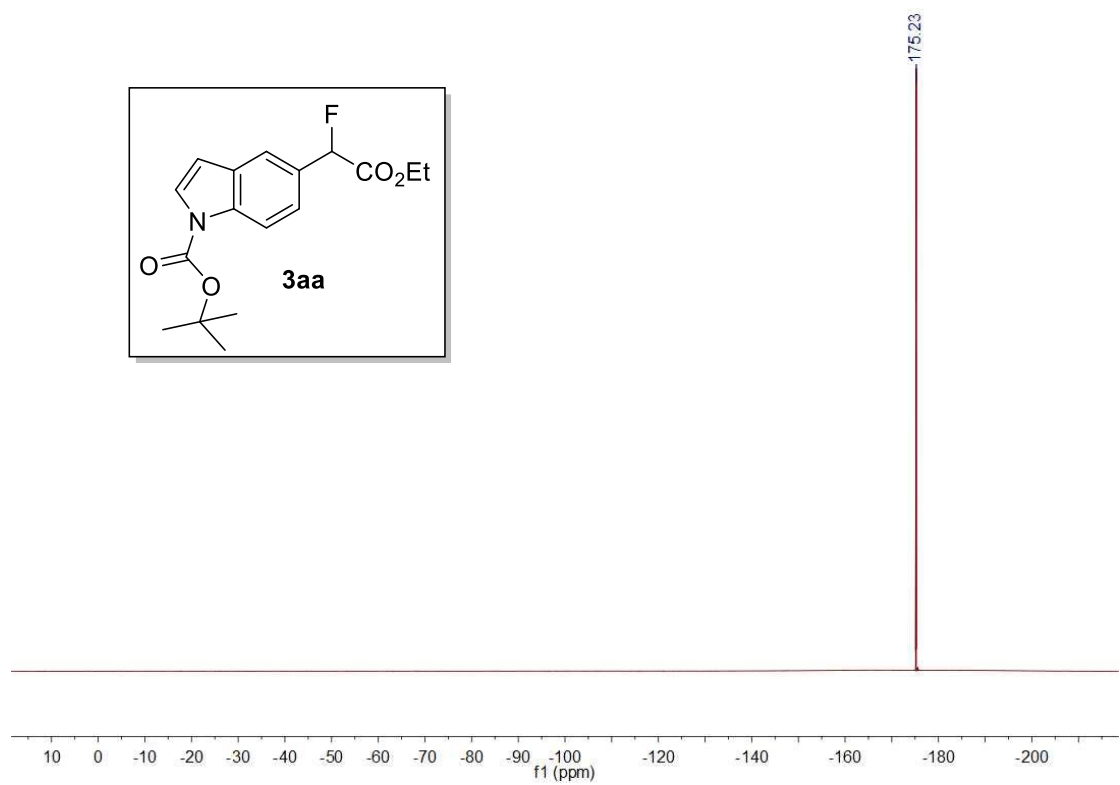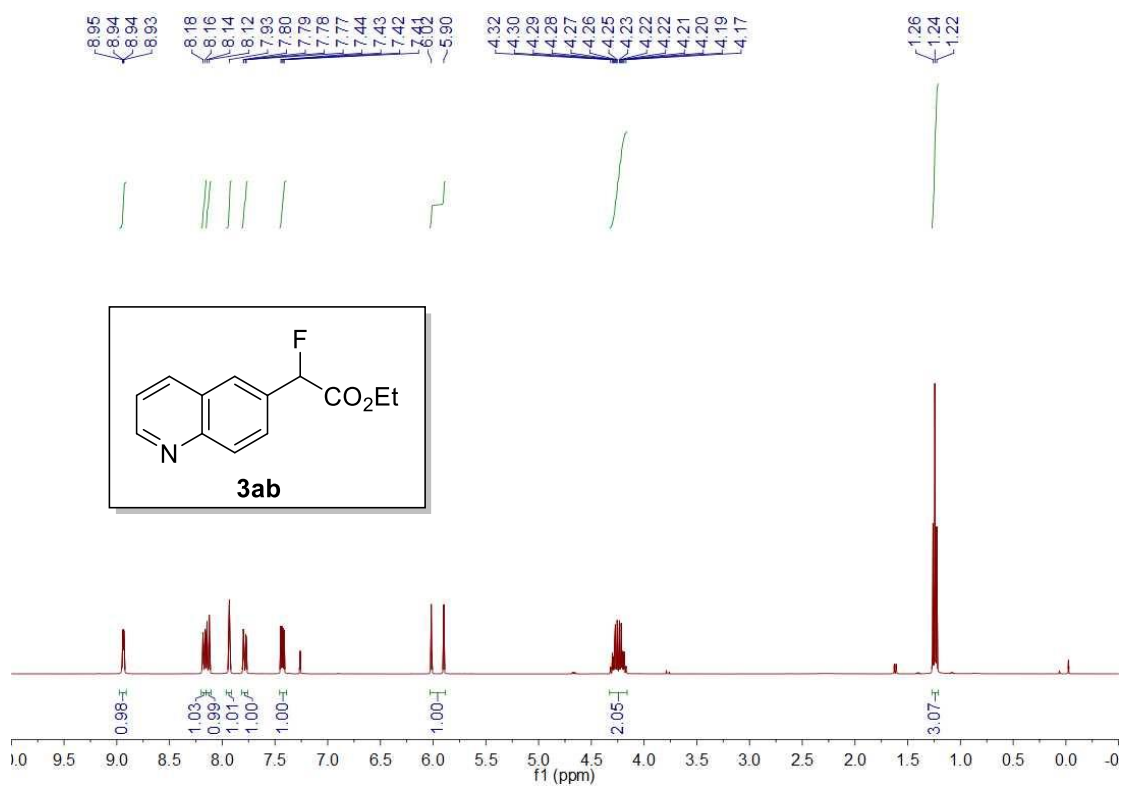

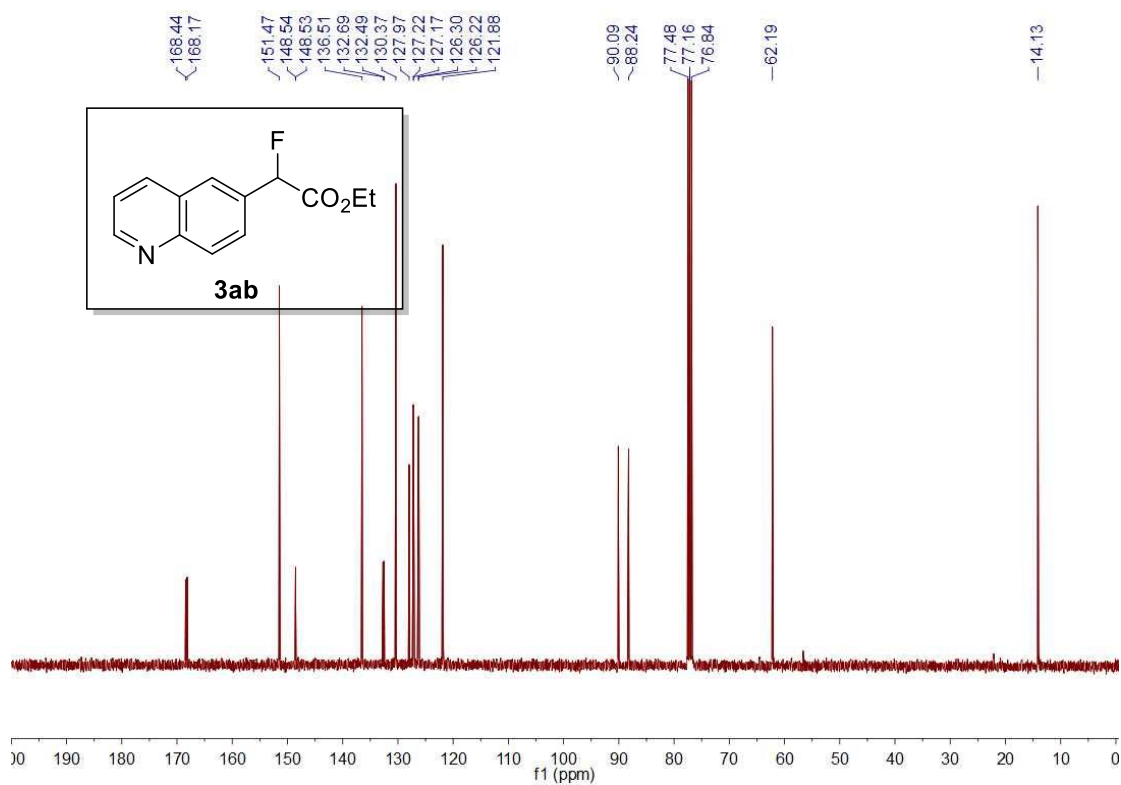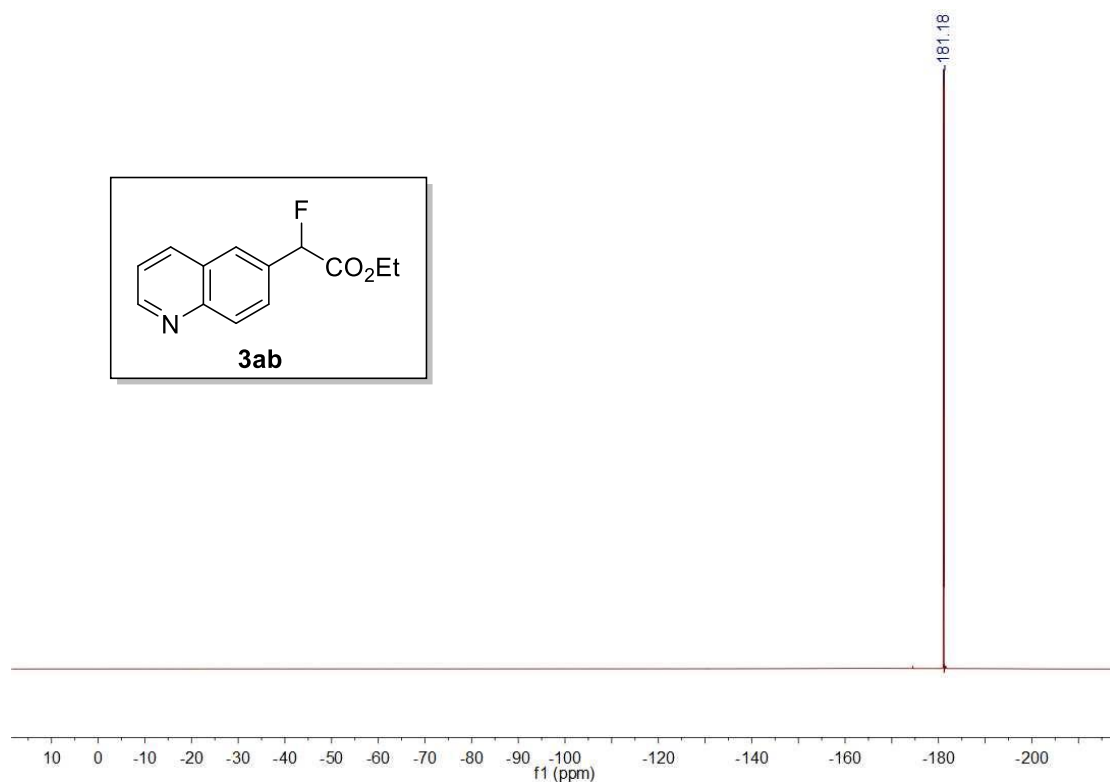

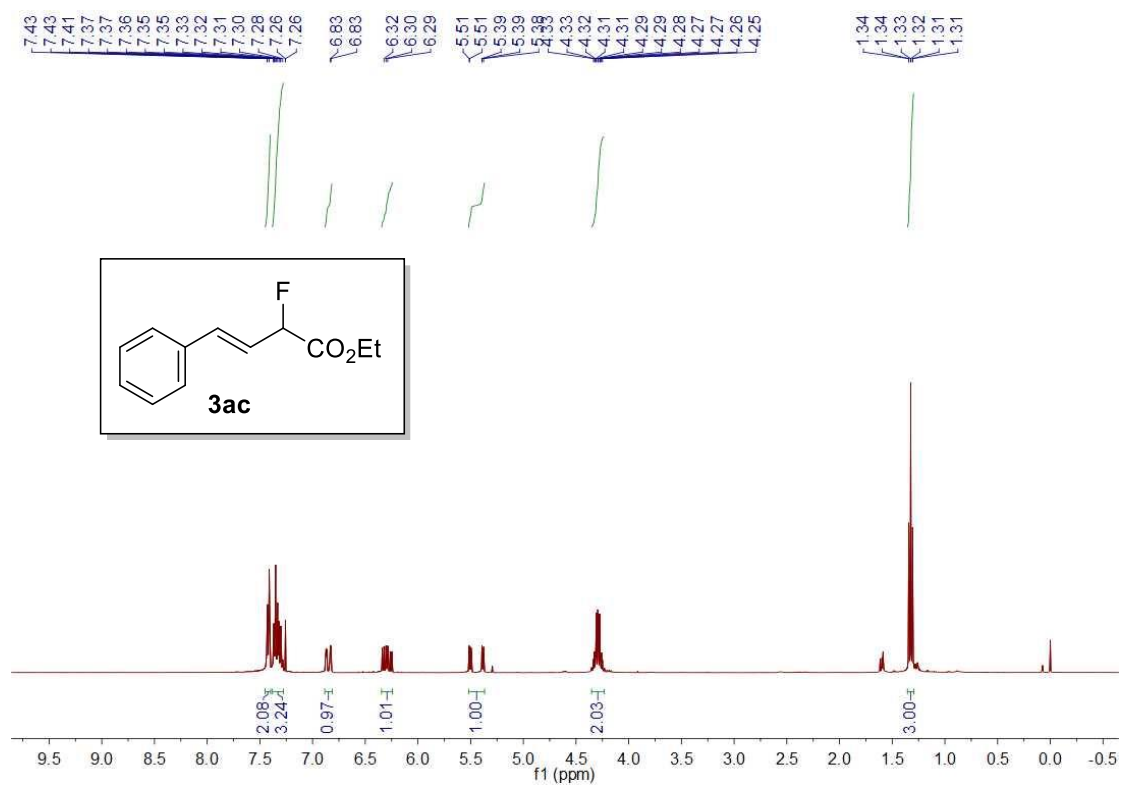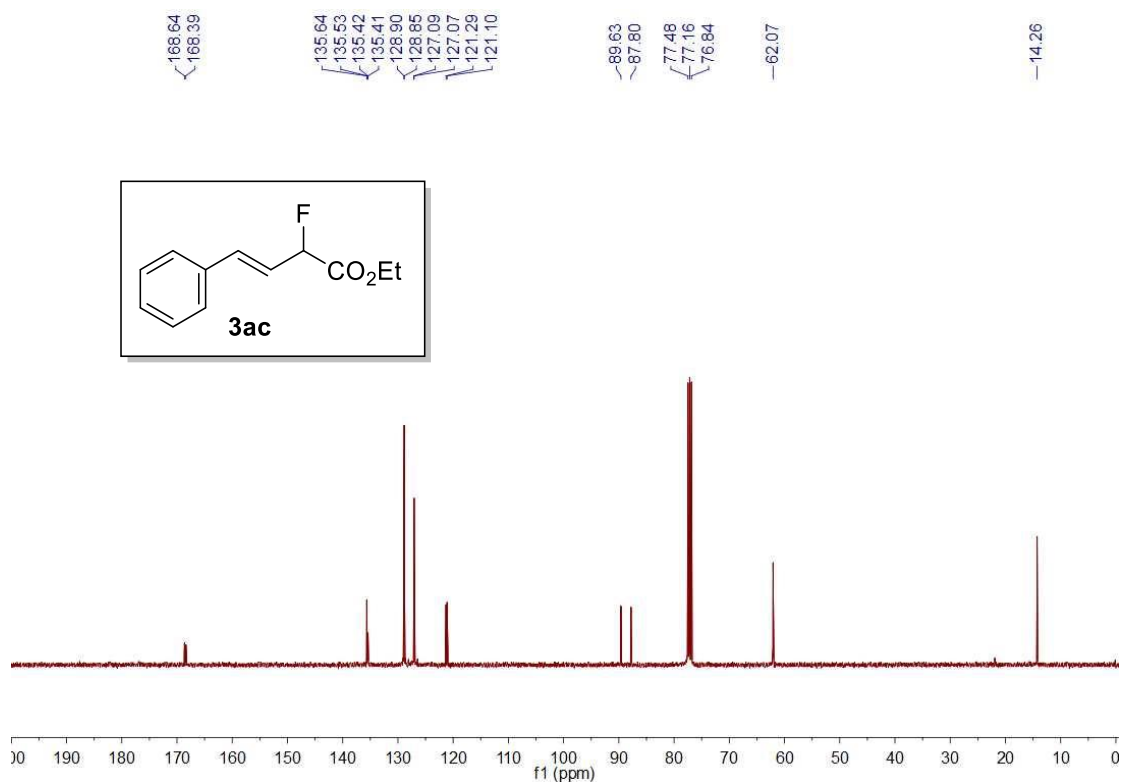

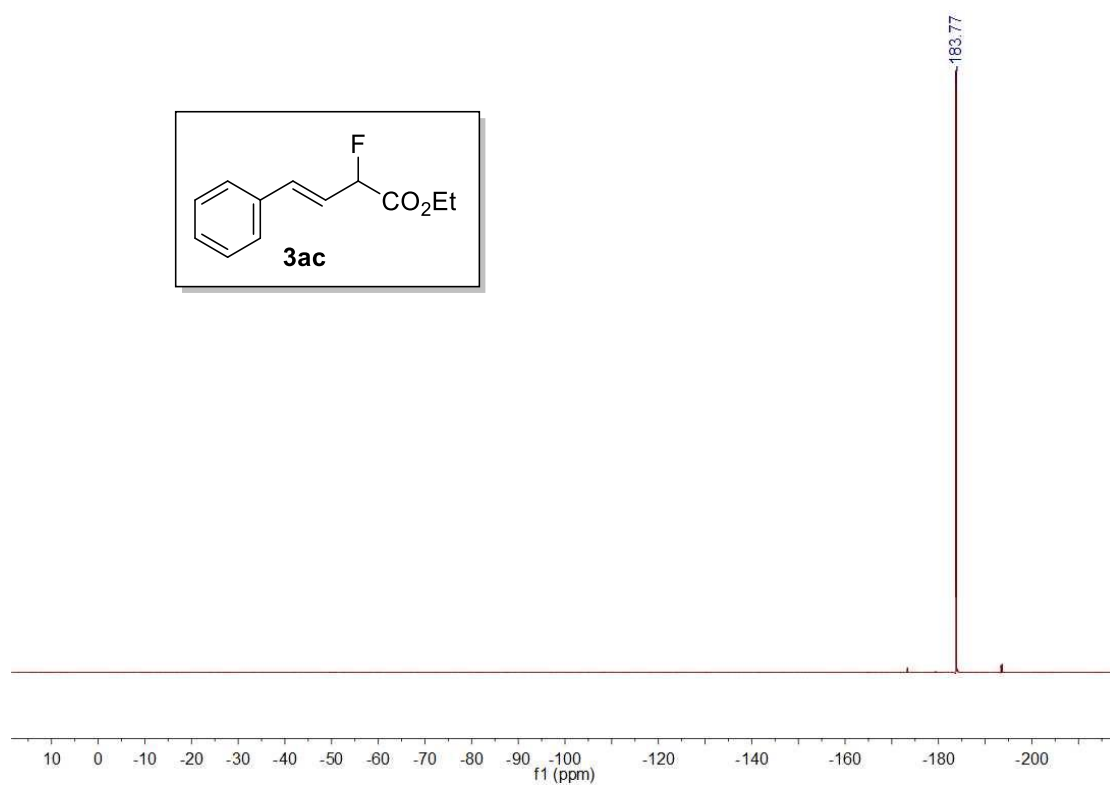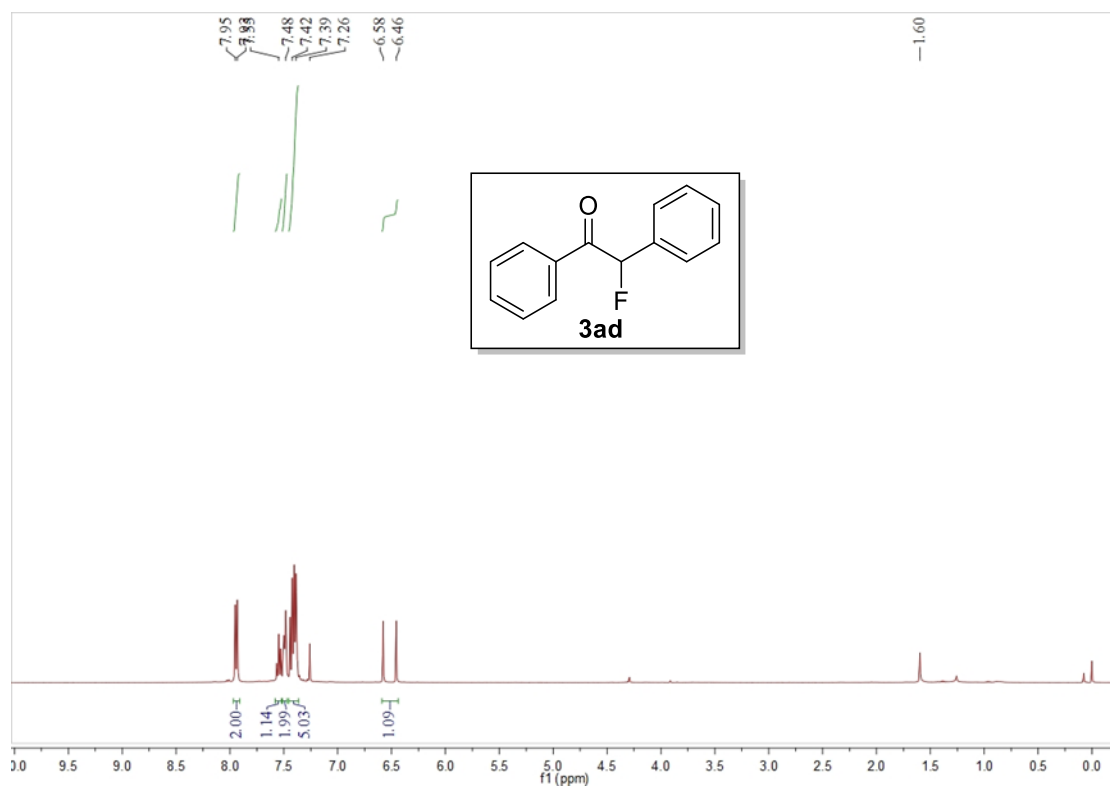

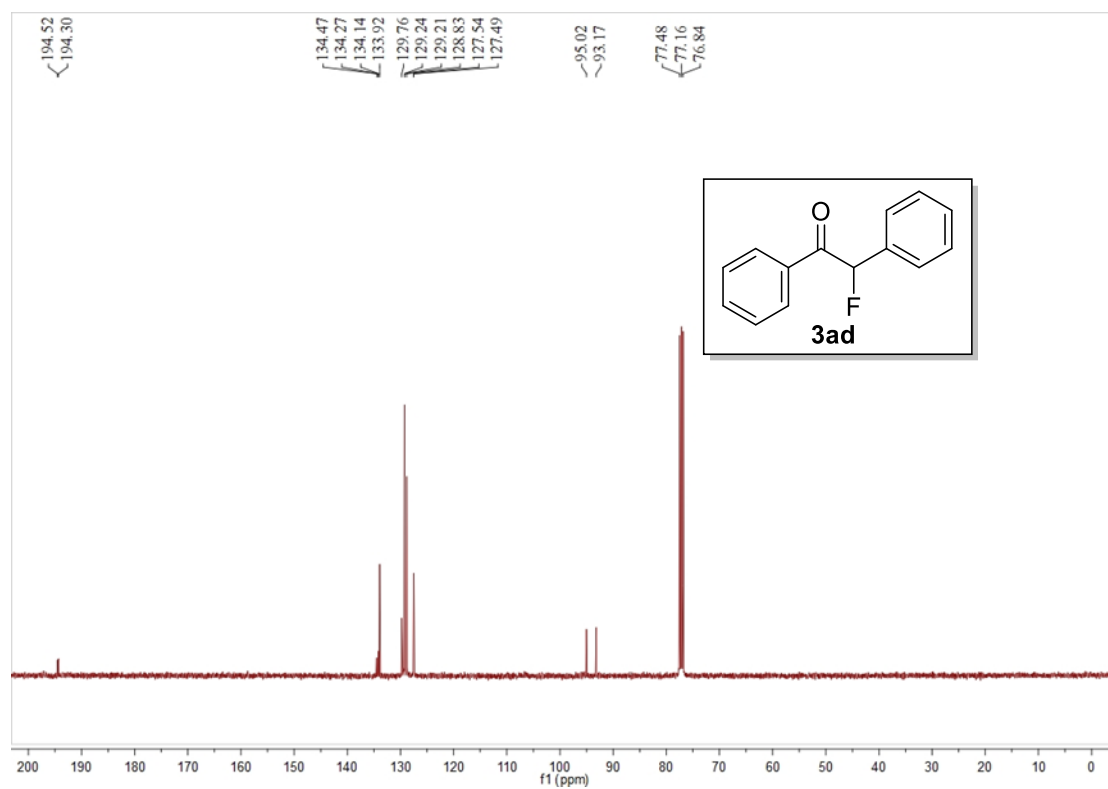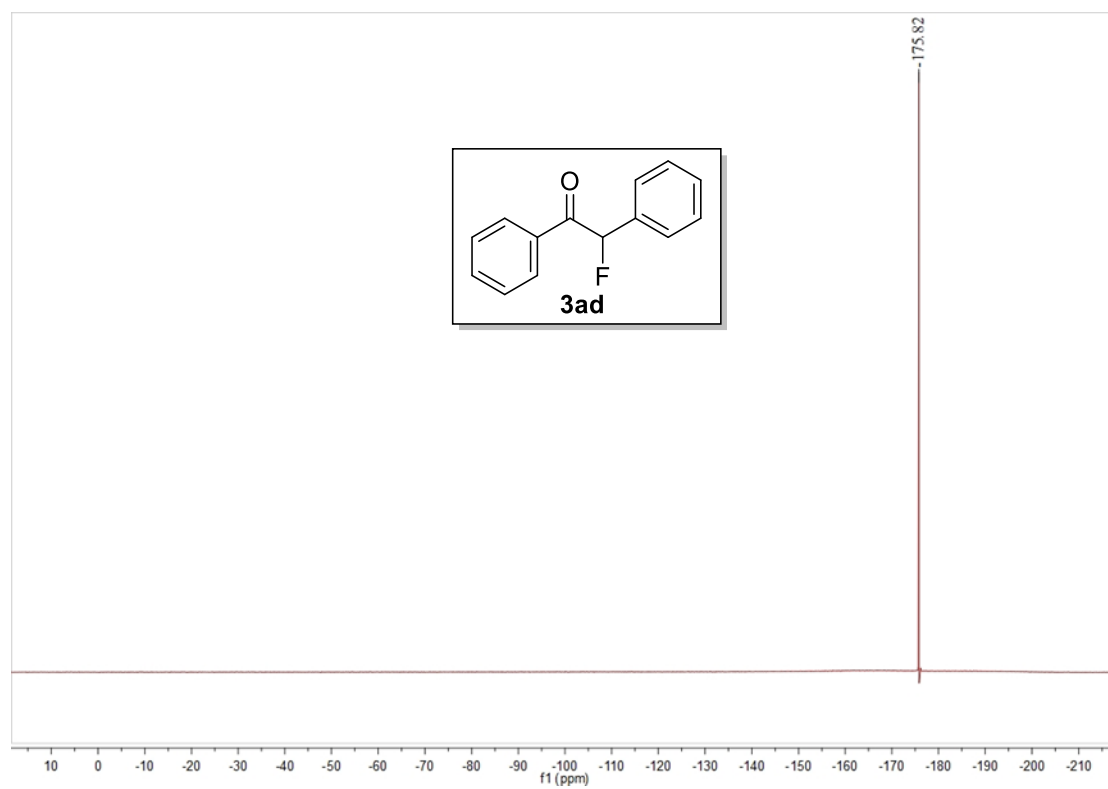

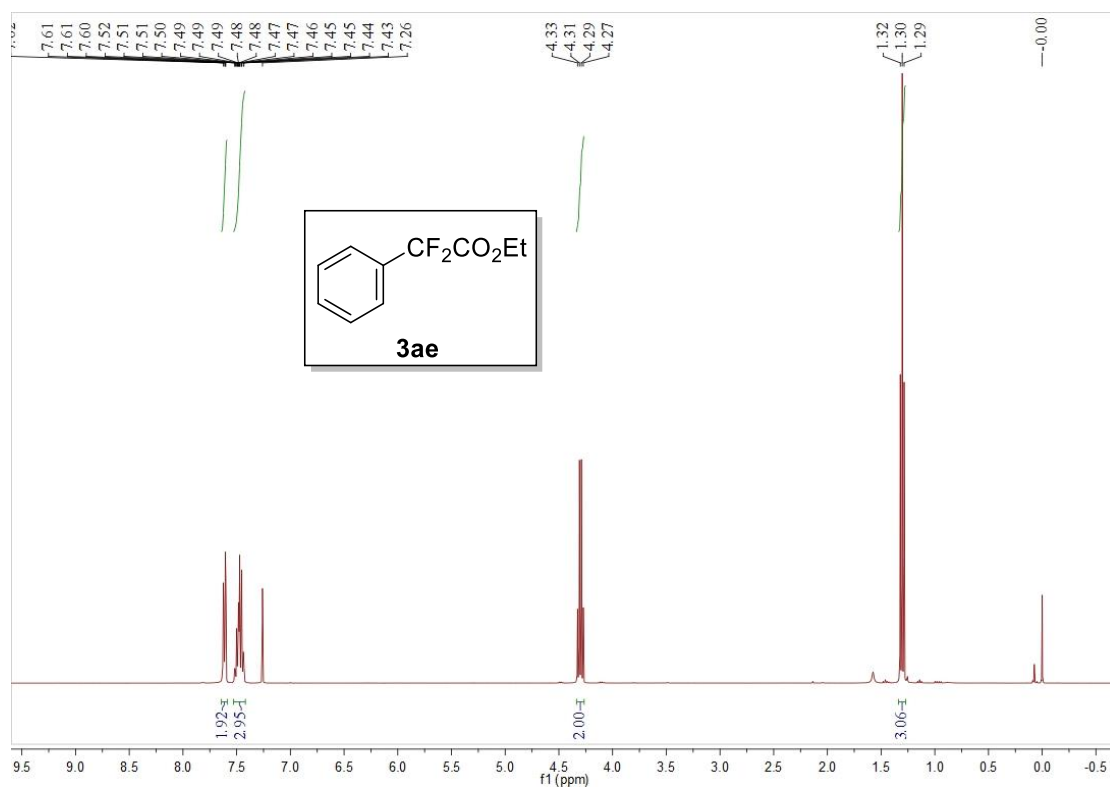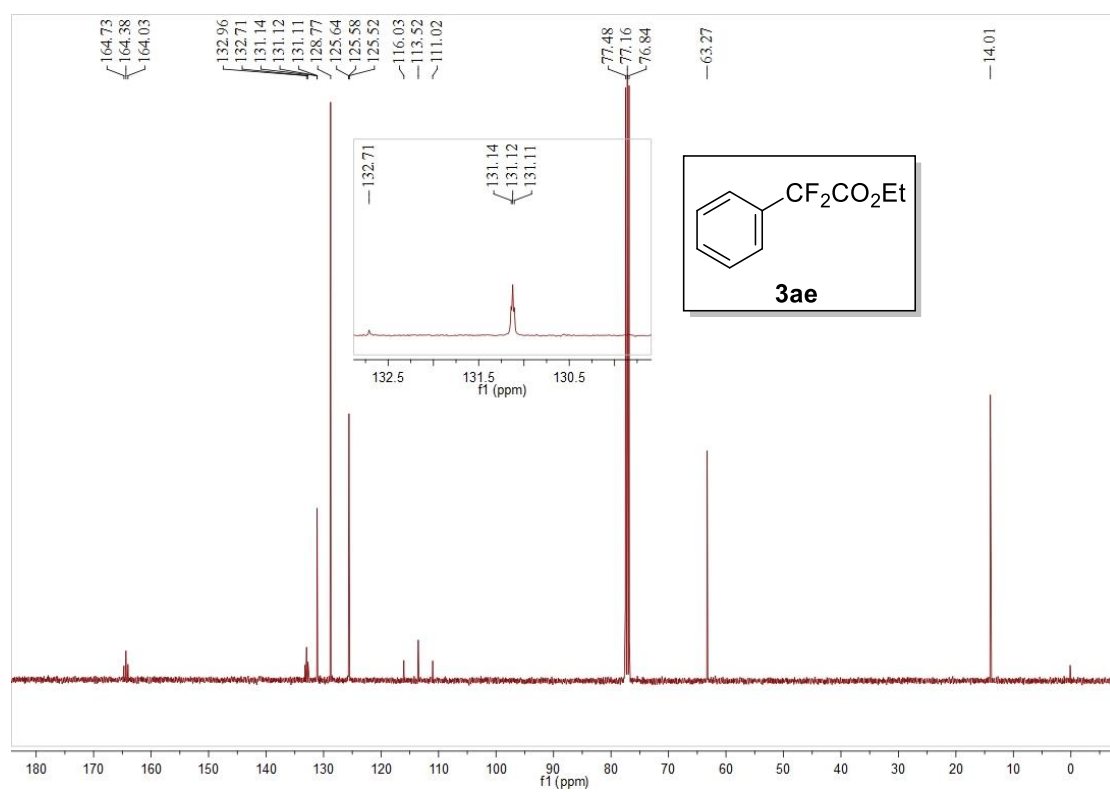

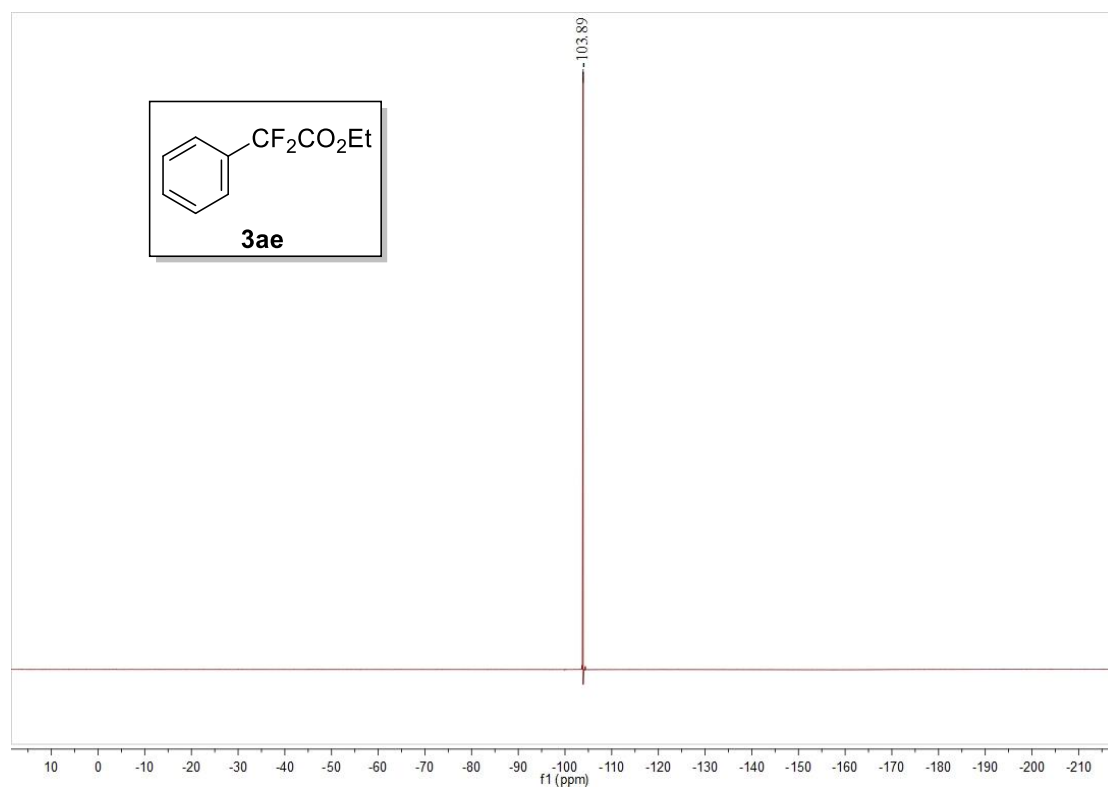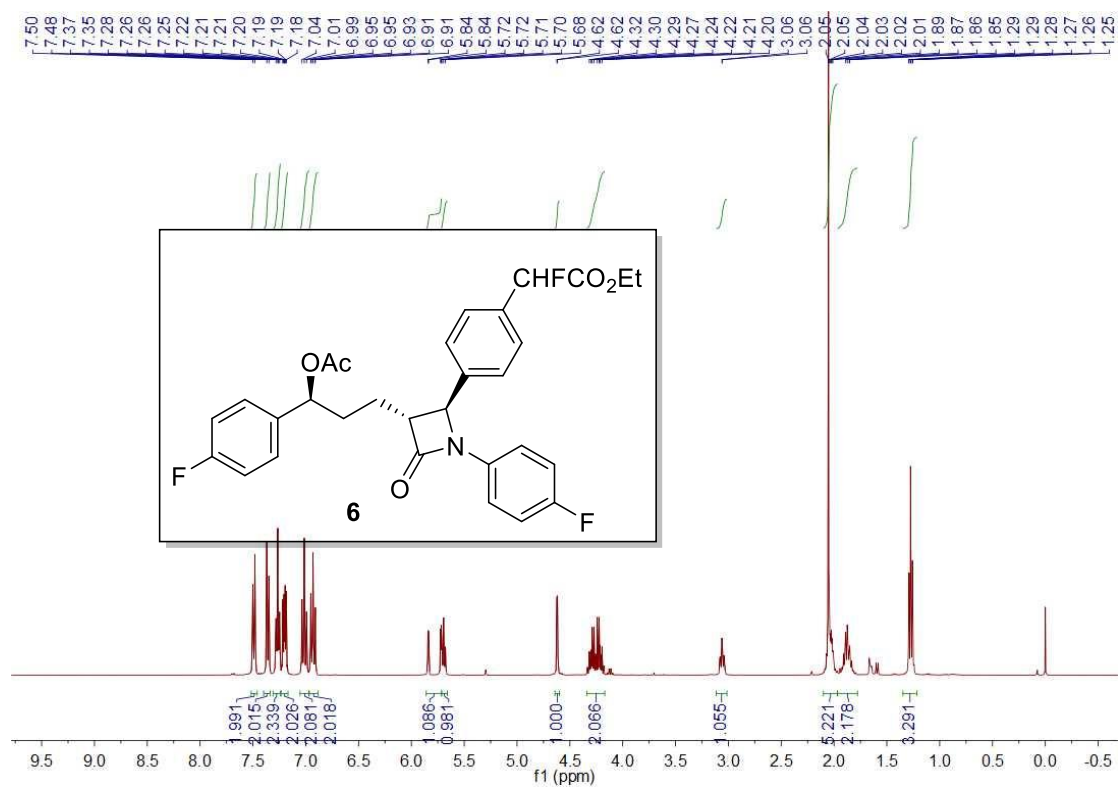



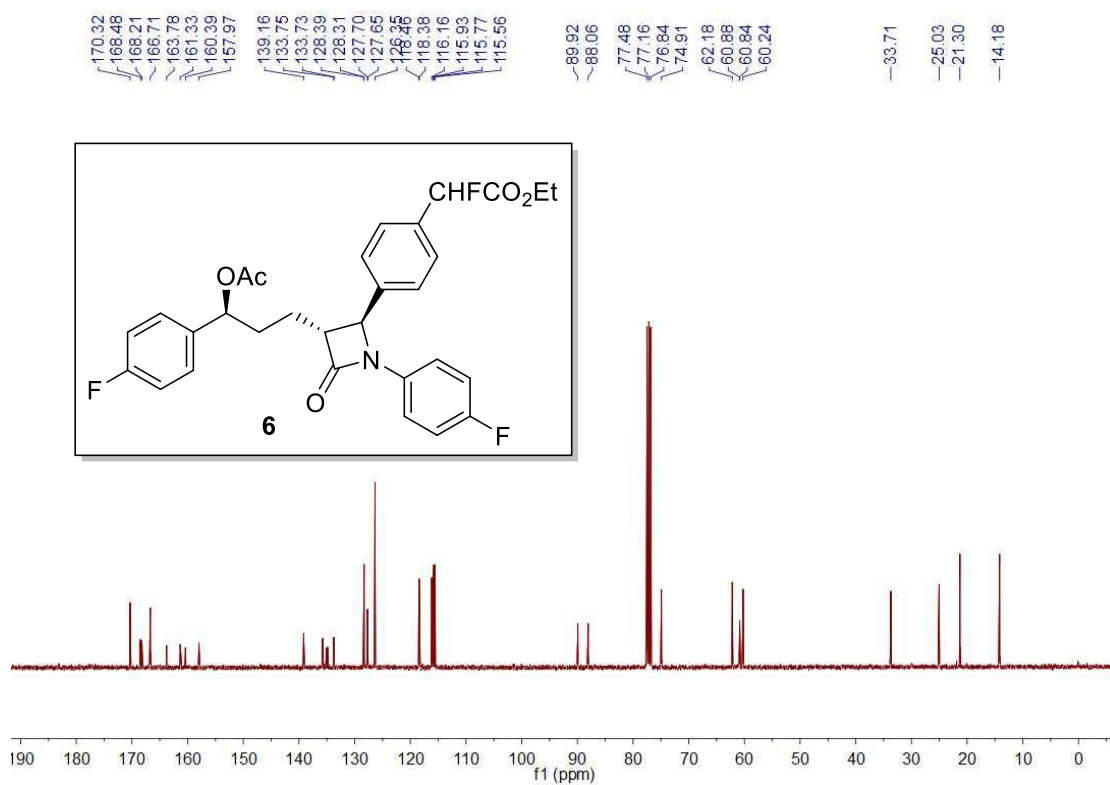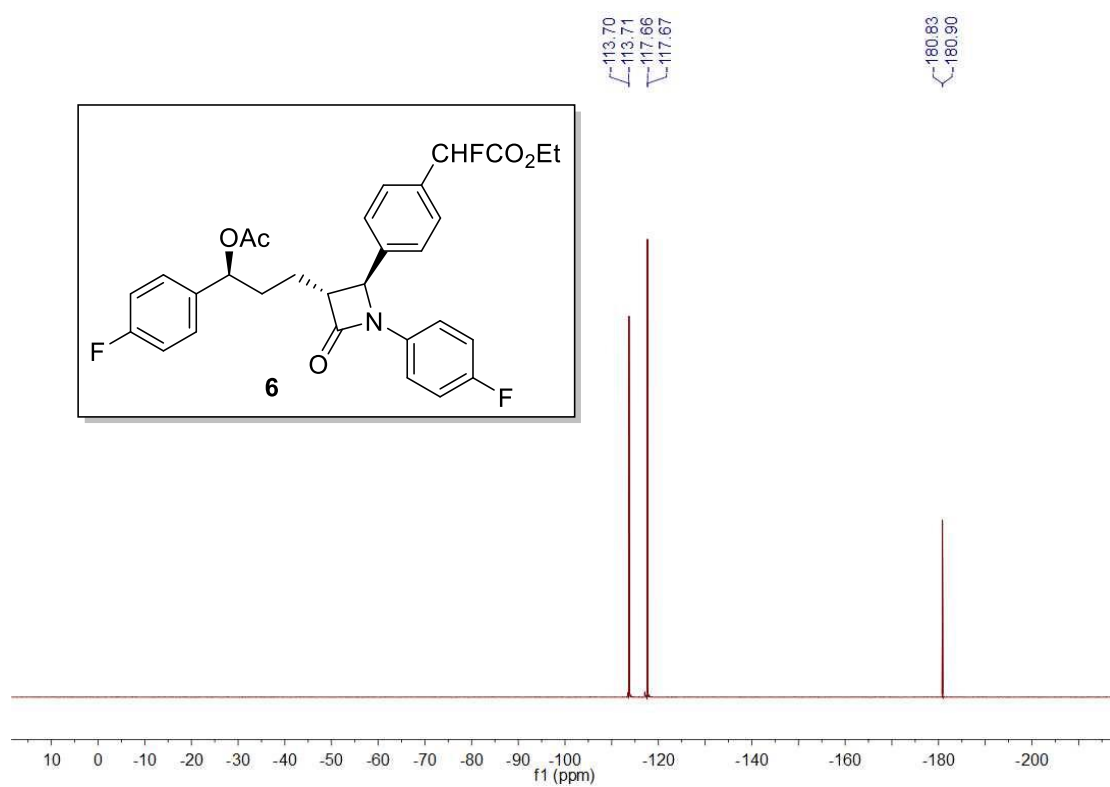

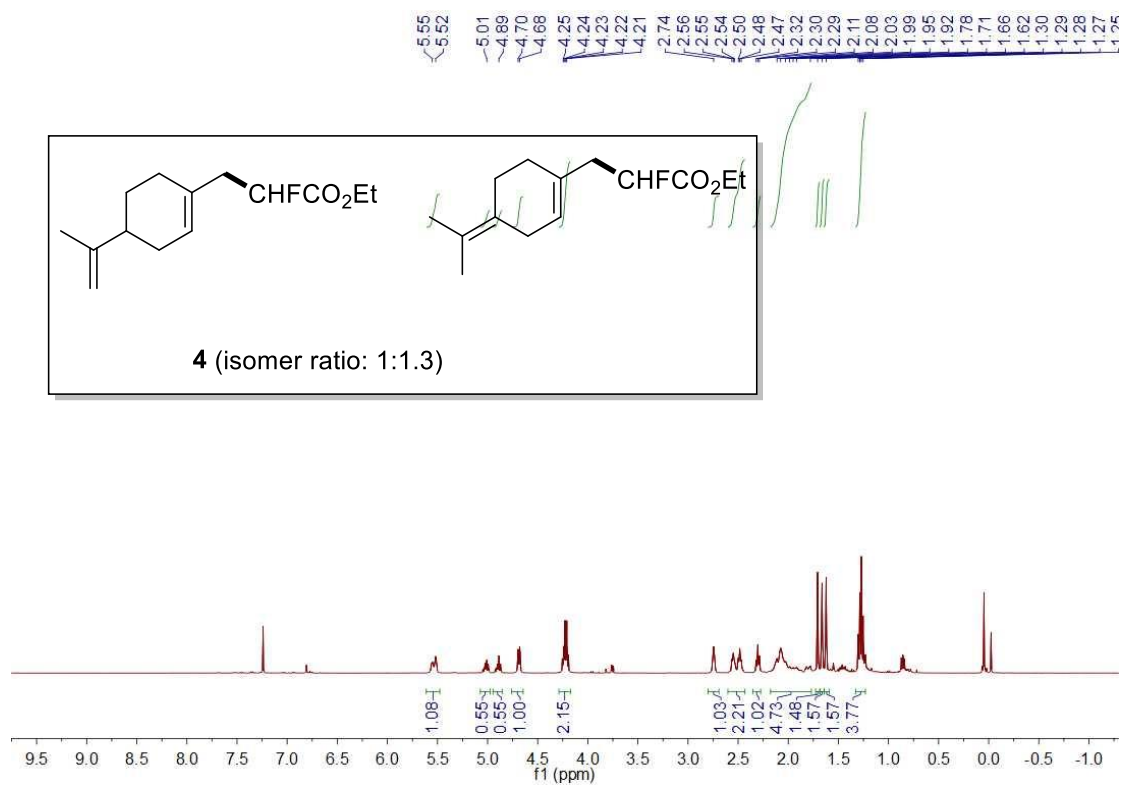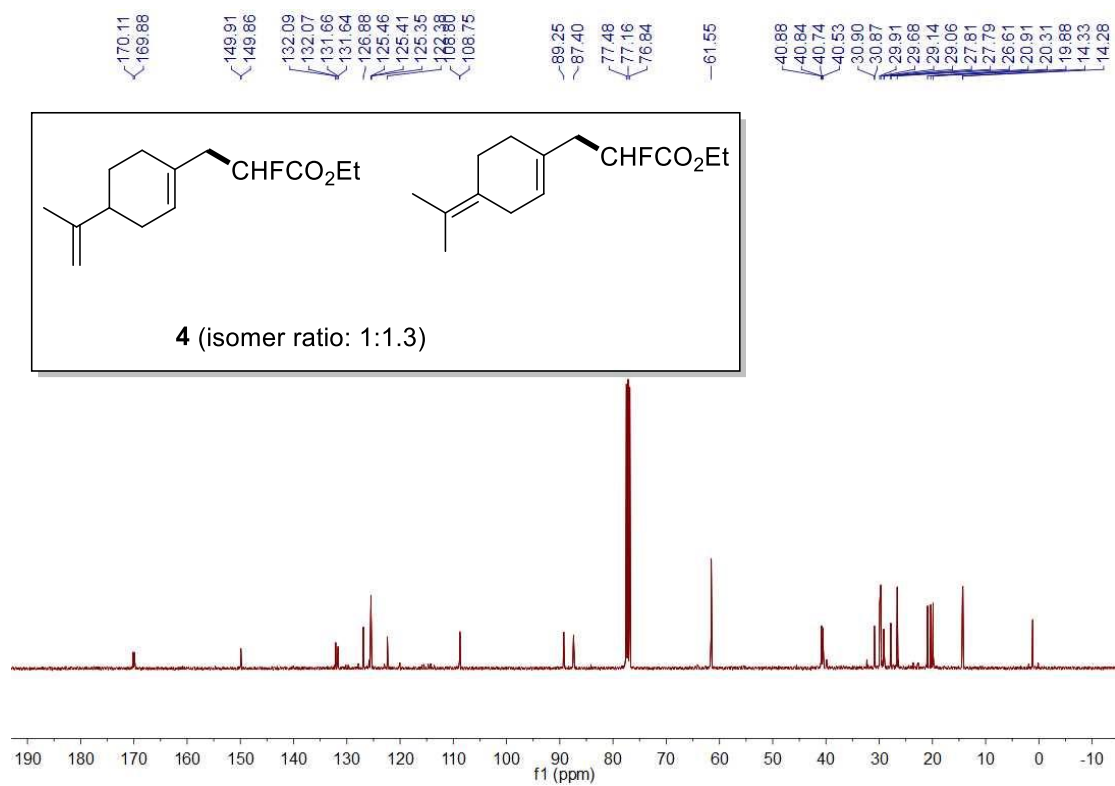

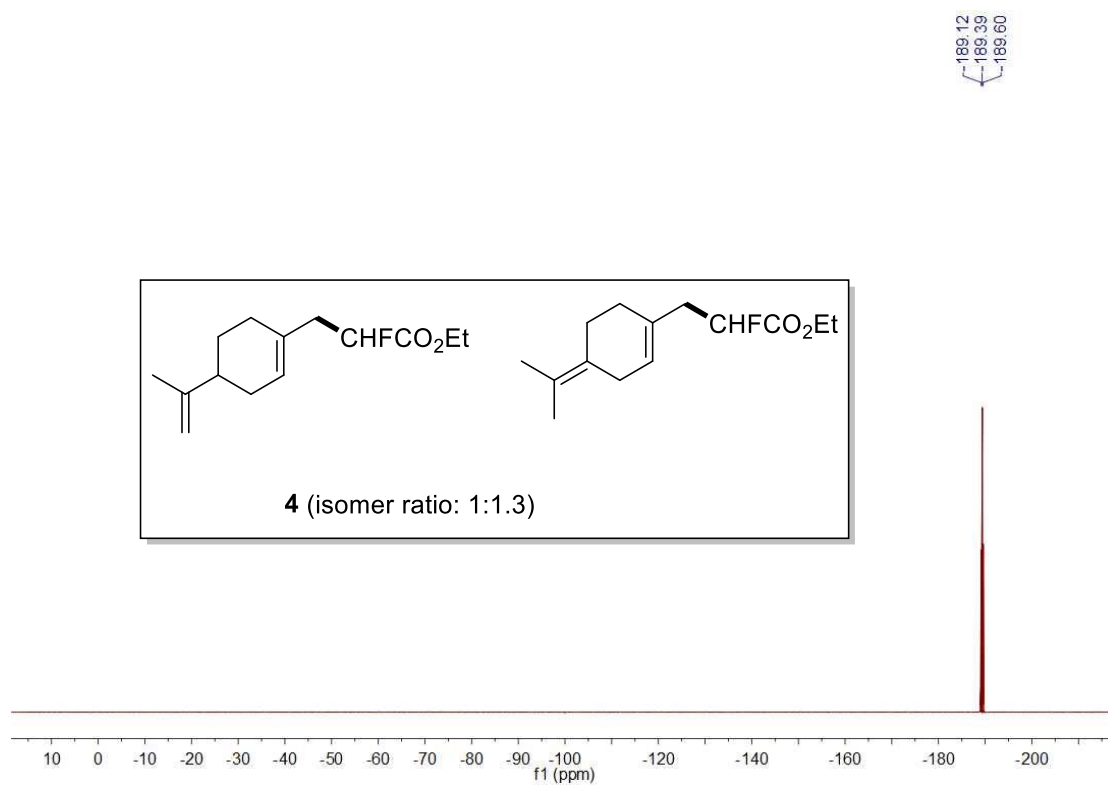

Supplement: Supplementary file 1 [file 6498723]
